1 **Disentangling Sources of Gene Tree Discordance in Phylotranscriptomic Datasets: A Case**  
2 **Study from Amaranthaceae s.l.**

3

4 Diego F. Morales-Briones<sup>1\*</sup>, Gudrun Kadereit<sup>2</sup>, Delphine T. Tefarikis<sup>2</sup>, Michael J. Moore<sup>3</sup>,  
5 Stephen A. Smith<sup>4</sup>, Samuel F. Brockington<sup>5</sup>, Alfonso Timoneda<sup>5</sup>, Won C. Yim<sup>6</sup>, John C.  
6 Cushman<sup>6</sup>, Ya Yang<sup>1\*</sup>

7

8 <sup>1</sup> Department of Plant and Microbial Biology, University of Minnesota-Twin Cities, 1445  
9 Gortner Avenue, St. Paul, MN 55108, USA

10 <sup>2</sup> Institut für Molekulare Physiologie, Johannes Gutenberg-Universität Mainz, D-55099, Mainz,  
11 Germany

12 <sup>3</sup> Department of Biology, Oberlin College, Science Center K111, 119 Woodland Street, Oberlin,  
13 OH 44074-1097, USA

14 <sup>4</sup> Department of Ecology & Evolutionary Biology, University of Michigan, 830 North University  
15 Avenue, Ann Arbor, MI 48109-1048, USA

16 <sup>5</sup> Department of Plant Sciences, University of Cambridge, Tennis Court Road, Cambridge, CB2  
17 3EA, United Kingdom

18 <sup>6</sup> Department of Biochemistry and Molecular Biology, University of Nevada, Reno, NV, 89577,  
19 USA

20

21 \* Correspondence to be sent to: Diego F. Morales-Briones and Ya Yang. Department of Plant and  
22 Microbial Biology, University of Minnesota, 1445 Gortner Avenue, St. Paul, MN 55108, USA,  
23 Telephone: +1 612-625-6292 (YY) Email: [dfmoralesb@gmail.com](mailto:dfmoralesb@gmail.com); [yangya@umn.edu](mailto:yangya@umn.edu)

24 **Abstract.**— Phylogenomic datasets have become common and fundamental to understanding the  
25 phylogenetic relationships of recalcitrant groups across the Tree of Life. At the same time,  
26 working with large genomic or transcriptomic datasets requires special attention to the processes  
27 that generate gene tree discordance, such as data processing and orthology inference, incomplete  
28 lineage sorting, hybridization, model violation, and uninformative gene trees. Methods to  
29 estimate species trees from phylogenomic datasets while accounting for all sources of conflict  
30 are not available, but a combination of multiple approaches can be a powerful tool to tease apart  
31 alternative sources of conflict. Here using a phylotranscriptomic analysis in combination with  
32 reference genomes, we explore sources of gene tree discordance in the backbone phylogeny of  
33 the plant family Amaranthaceae s.l. The dataset was analyzed using multiple phylogenetic  
34 approaches, including coalescent-based species trees and network inference, gene tree  
35 discordance analyses, site pattern test of introgression, topology test, synteny analyses, and  
36 simulations. We found that a combination of processes might have acted, simultaneously and/or  
37 cumulatively, to generate the high levels of gene tree discordance in the backbone of  
38 Amaranthaceae s.l. Furthermore, other analytical shortcomings like uninformative genes as well  
39 as misspecification of the model of molecular evolution seem to contribute to tree discordance  
40 signal in this family. Despite the comprehensive phylogenomic dataset and detailed analyses  
41 presented here, no single source can confidently be pointed out to account for the strong signal of  
42 gene tree discordance, suggesting that the backbone of Amaranthaceae s.l. might be a product of  
43 an ancient and rapid lineage diversification, and remains —and probably will remain—  
44 unresolved even with genome-scale data. Our work highlights the need to test for multiple  
45 sources of conflict in phylogenomic analyses and provide a set of recommendations moving  
46 forward in disentangling ancient and rapid diversification.

47 **Keywords:** Amaranthaceae; gene tree discordance; hybridization; incomplete lineage sorting;  
48 phylogenomics; transcriptomics; species tree; species network.

49

50

51

52

53

54

55

56

57

58

59

60

61

62

63

64

65

66

67

68

69

70 The detection of gene tree discordance is ubiquitous in the phylogenomic era. As large  
71 phylogenomic datasets are becoming more common (e.g. Jarvis et al. 2014; Misof et al. 2014;  
72 Wickett et al. 2014; Hughes et al. 2018; Walker et al. 2018; Laumer et al. 2019; Varga et al.  
73 2019), exploring gene tree heterogeneity in such datasets (e.g. Salichos et al. 2014; Smith et al.  
74 2015; Huang et al. 2016; Arcila et al. 2017; Pease et al. 2018, is essential for inferring  
75 phylogenetic relationships while accommodating and understanding the underlying processes  
76 that produce gene tree conflict.

77         Discordance among gene trees can be the product of multiple sources. These include  
78 errors and noise in data assembly and filtering, hidden paralogy, incomplete lineage sorting  
79 (ILS), gene duplication/loss (Pamilo and Nei 1988; Doyle 1992; Maddison 1997; Galtier and  
80 Daubin 2008), random noise from uninformative genes, as well as misspecified model  
81 parameters of molecular evolution such as substitutional saturation, codon usage bias, or  
82 compositional heterogeneity (Foster 2004; Cooper 2014; Cox et al. 2014; Li et al. 2014; Liu et  
83 al. 2014). Among these potential sources of gene tree discordance, ILS is the most studied in the  
84 systematics literature (Edwards 2009), and a number of phylogenetic inference methods have  
85 been developed that accommodate ILS as the source of discordance (reviewed in Edwards et al.  
86 2016; Mirarab et al. 2016; Xu and Yang 2016). More recently, methods that account for  
87 additional processes such as hybridization or introgression have gained attention. These include  
88 methods that estimate phylogenetic networks while accounting for ILS and hybridization  
89 simultaneously (Yu et al. 2014; Yu and Nakhleh 2015; Solís-Lemus and Ané 2016; Wen et al.  
90 2016b; Wen and Nakhleh 2018; Zhang et al. 2018a; Zhu et al. 2018; Zhu et al. 2019), and  
91 methods that detect introgression based on site patterns or phylogenetic invariants (Green et al.

92 2010; Durand et al. 2011; Patterson et al. 2012; Eaton and Ree 2013; Pease and Hahn 2015;  
93 Elworth et al. 2018; Glémin et al. 2019; Kubatko and Chifman 2019).

94       The above sources of gene tree discordance can act alone, but most often multiple  
95 sources may contribute to gene tree heterogeneity (Holder et al. 2001; Buckley et al. 2006;  
96 Maureira-Butler et al. 2008; Joly et al. 2009; Meyer et al. 2017; Knowles et al. 2018; Glémin et  
97 al. 2019). However, at present no method can estimate species trees from phylogenomic data  
98 while modeling multiple sources of conflict and molecular substitution simultaneously. To  
99 overcome these limitations, the use of multiple phylogenetic tools and data partitioning schemes  
100 in phylogenomic datasets have become a common practice in order to disentangle sources of  
101 gene tree heterogeneity and resolve recalcitrant relationships at deep and shallow nodes of the  
102 Tree of Life (e.g. Duchêne et al. 2018; Prasanna et al. 2019; Alda et al. 2019; Roycroft et al.  
103 2019; Widhelm et al. 2019).

104       Here we explore these issues in the plant family Amaranthaceae s.l., including the  
105 previously segregated family Chenopodiaceae (Hernández-Ledesma et al. 2015; The  
106 Angiosperm Phylogeny Group et al. 2016). With c. 2050 to 2500 species in 181 genera and a  
107 worldwide distribution (Hernández-Ledesma et al. 2015), Amaranthaceae s.l. are iconic for the  
108 repeated evolution of complex traits representing adaptations to extreme environments such as  
109 C<sub>4</sub> photosynthesis in hot and often dry environments (e.g. Kadereit et al. 2012; Bena et al. 2017),  
110 various modes of extreme salt tolerance (e.g. Flowers and Colmer 2015; Piirainen et al. 2017)  
111 that in several species are coupled with heavy metal tolerance (Moray et al. 2016), and very fast  
112 seed germination and production of multiple diaspore types on one individual (Kadereit et al.  
113 2017). Amaranthaceae s.l. contains a number of crops, some of them with a long cultivation  
114 history, such as the pseudocereals quinoa and amaranth (Jarvis et al. 2017), and some that have

115 been taken under cultivation more recently, such as sugar beet (Dohm et al. 2014), spinach,  
116 glassworts, and *Salsola soda*. Many species of the family are important fodder plants in arid  
117 regions and several are currently being investigated for their soil ameliorating and desalinating  
118 effects. Reference genomes are available for *Beta vulgaris* (sugar beet, subfamily Betoideae;  
119 Dohm et al. 2014), *Chenopodium quinoa* (quinoa, Chenopodioideae; Jarvis et al. 2017), *Spinacia*  
120 *oleracea* (spinach; Chenopodioideae; Xu et al. 2017) and *Amaranthus hypochondriacus*  
121 (amaranth; Amaranthoideae; Lightfoot et al. 2017), representing three of the 13 currently  
122 recognized subfamilies (sensu Kadereit et al. 2003; Kadereit et al. 2017).

123         Within the core Caryophyllales the previously recognized families Amaranthaceae s.s.  
124 and Chenopodiaceae have always been regarded as closely related and their separate family  
125 status has been subjected to phylogenetic and taxonomic debate repeatedly (see Kadereit et al.  
126 2003; Masson and Kadereit 2013; Hernández-Ledesma et al. 2015; Walker et al. 2018; Fig. 1).  
127 Their common ancestry was first concluded from a number of shared morphological, anatomical  
128 and phytochemical synapomorphies and later substantiated by molecular phylogenetic studies  
129 with the Achatocarpaceae as sister group (see Kadereit et al. 2003 and references therein).  
130 Amaranthaceae s.s. has a predominant tropical and subtropical distribution with the highest  
131 diversity found in the Neotropics, eastern and southern Africa and Australia (Müller and Borsch  
132 2005), while the previously segregated family Chenopodiaceae predominantly occurs in  
133 temperate regions and semi-arid or arid environments of subtropical regions (Kadereit et al.  
134 2003). The key problem has always been the species-poor and heterogeneous subfamilies  
135 Polycnemoideae and Betoideae, which do not fit comfortably morphologically in either the  
136 Chenopodiaceae or Amaranthaceae s.s. (cf. Table 5 in Kadereit et al. 2003). Polycnemoideae are  
137 similar in ecology and distribution to Chenopodiaceae but share important floral traits such as

## GENE TREE DISCORDANCE IN PHYLOTRANSCRIPTOMICS

7

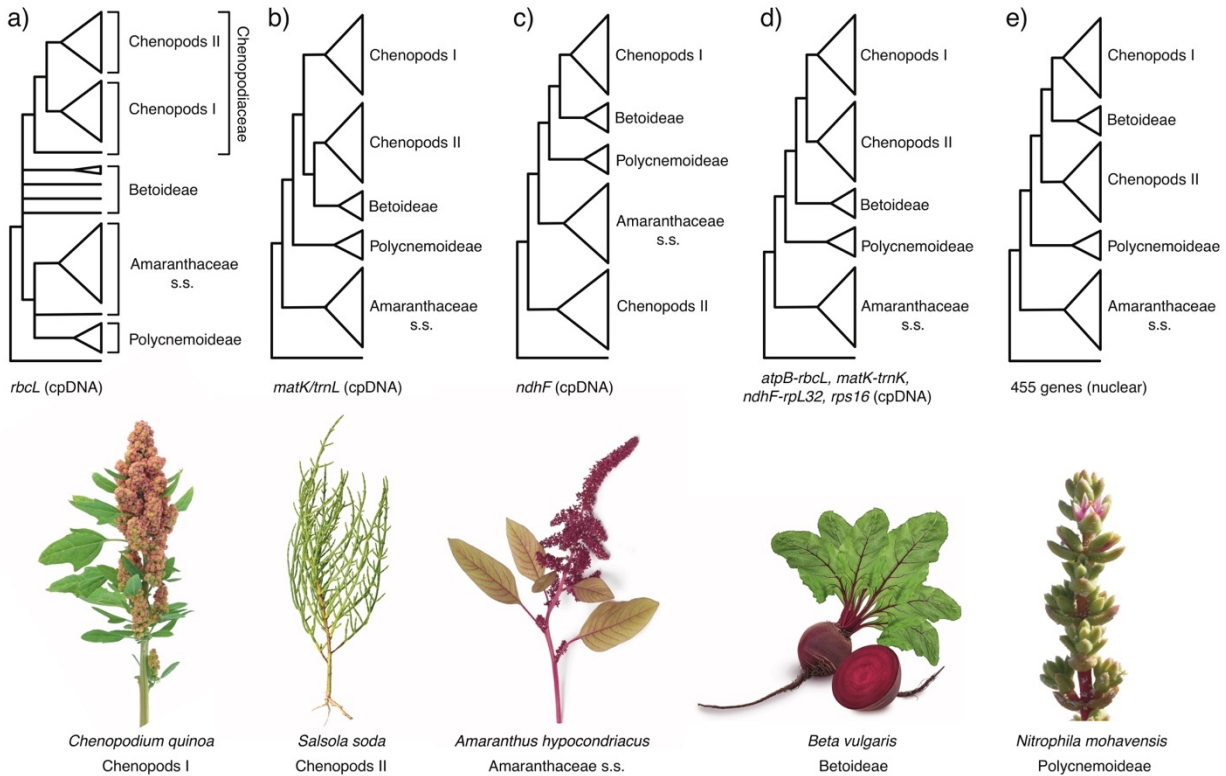

138

139

140 **FIGURE 1.** Phylogenetic hypothesis of Amaranthaceae s.l. from previous studies. a) Kadereit et  
141 al. (2003) using the chloroplast (cpDNA) *rbcL* coding region. b) Müller and Borsch (2005);  
142 using the chloroplast *matK* coding region and partial *trnL* intron. c) Hohmann et al. (2006) using  
143 the chloroplast *ndhF* coding region. d) Kadereit et al. (2017) using the chloroplast *atpB-rbcL*  
144 spacer, *matK* with *trnL* intron, *ndhF-rpL32* spacer, and *rps16* intron e) Walker et al. (2018) using  
145 455 nuclear genes from transcriptome data. Major clades of Amaranthaceae s.l. named following  
146 the results of this study. Image credits: *Amaranthus hypochondriacus* by Picture Partners, *Beta*  
147 *vulgaris* by Olha Huchek, *Chenopodium quinoa* by Diana Mower, *Nitrophila mohavensis* by  
148 James M. André, and *Salsola soda* by Homeydesign.

149

150 petaloid tepals, filament tubes and 2-locular anthers with Amaranthaceae s.s. Morphologically,  
151 Betoideae fit into either of the two traditionally circumscribed families but have a unique fruit  
152 type—a capsule that opens with a circumscissile lid (Kadereit et al. 2006). Both Betoideae and

153 Polycnemoideae show strongly disjunct distribution patterns, occurring each with only a few  
154 species on three different continents. Furthermore, the genera of both subfamilies display a  
155 number of morphologically dissociating features. Both intercontinental disjunctions of species-  
156 poor genera and unique morphological traits led to the hypothesis that Betoideae and  
157 Polycnemoideae might be relicts of, or from hybridization among early-branching lineages in  
158 Amaranthaceae s.l. (Hohmann et al. 2006; Masson and Kadereit 2013).

159 Previous molecular phylogenetic analyses struggled to resolve the relationships among  
160 Betoideae, Polycnemoideae and the rest of the Amaranthaceae s.l. (Kadereit et al. 2003; Müller  
161 and Borsch 2005; Kadereit et al. 2012; Masson and Kadereit 2013; Walker et al. 2018). The first  
162 phylogenomic study of Amaranthaceae s.l. by Walker et al. (2018) revealed that gene tree  
163 discordance mainly occurred at deeper nodes of the phylogeny involving Betoideae.  
164 Polycnemoideae was resolved as sister to Chenopodiaceae in Walker et al. (2018), albeit with  
165 low (17%) gene tree concordance, which contradicted previous analyses based on chloroplast  
166 data (Masson and Kadereit 2013). However, only a single species of Betoideae (the cultivated  
167 beet and its wild relative) was sampled in Walker et al. (2018). In addition, sources of conflicting  
168 signals among species trees remained unexplored.

169 In this study, we leverage 71 publicly available transcriptomes, 17 newly sequenced  
170 transcriptomes, and 4 reference genomes that span all 13 subfamilies of Amaranthaceae s.l. and  
171 include increased taxon sampling in Betoideae. Consistent with previous analyses, we identified  
172 high levels of gene tree discordance in the backbone phylogeny of Amaranthaceae s.l. Using a  
173 combination of phylogenetic approaches, we explored multiple sources that can explain such  
174 conflict. We tested for 1) ancient hybridization, focusing on the hypothesis of the hybrid origin  
175 of Polycnemoideae and Betoideae, between Amaranthaceae s.s. and Chenopodioideae, 2)



176 discordance produced by misspecifications of model of molecular evolution, and 3) discordance  
177 due to ILS as a result of short internal branches in the backbone phylogeny of Amaranthaceae s.l.  
178 In addition, we comprehensively updated the phylotranscriptomic pipeline of Yang and Smith  
179 (2014) with additional features of filtering isoforms and spurious tips. Our results showed that  
180 both species network and site pattern methods that model gene flow while accounting for ILS  
181 detected signals of multiple hybridization events in Amaranthaceae s.l. However, when these  
182 hybridization events were analyzed individually, most of the gene tree discordance could be  
183 explained by uninformative gene trees. In addition, the high level of gene tree discordance in  
184 Amaranthaceae s.l. could also be explained by three consecutive short branches that produce  
185 anomalous gene trees. Combined, our results showed that multiple processes might have  
186 contributed to the gene tree discordance in Amaranthaceae s.l., and that we might not be able to  
187 distinguish among these processes even with genomic-scale sampling and synteny information.  
188 Finally, we make recommendations on strategies for disentangling multiple sources of gene tree  
189 discordance in phylogenomic datasets.

190

191

## MATERIALS AND METHODS

192

193 An overview of all dataset and phylogenetic analyses can be found in Figure S1. Scripts for raw  
194 data processing, assembly, translation, and homology and orthology search can be found at  
195 [https://bitbucket.org/yanglab/phylogenomic\\_dataset\\_construction/](https://bitbucket.org/yanglab/phylogenomic_dataset_construction/) as part of an updated  
196 ‘phylogenomic dataset construction’ pipeline (Yang and Smith 2014).

197

198

199 *Taxon sampling, transcriptome sequencing*

200 We sampled 92 species (88 transcriptomes and four genomes) representing all 13 currently  
201 recognized subfamilies and 16 out of 17 tribes of Amaranthaceae s.l. (sensu [Kadereit et al.  
202 2003; Kadereit et al. 2017]). In addition, 13 outgroups across the Caryophyllales were included  
203 (ten transcriptomes and three genomes; Table S1). We generated 17 new transcriptomes for this  
204 study (Table S2). For *Tidestromia oblongifolia*, tissue collection, RNA isolation, library  
205 preparation was carried out using the KAPA Stranded mRNA-Seq Kits (KAPA Biosystems,  
206 Wilmington, Massachusetts, USA). The library was multiplexed with 10 other samples from a  
207 different project on an Illumina HiSeq2500 platform with V4 chemistry at the University of  
208 Michigan Sequencing Core (Yang et al. 2017). For the remaining 16 samples total RNA was  
209 isolated from c. 70-125 mg leaf tissue collected in liquid nitrogen using the RNeasy Plant Mini  
210 Kit (Qiagen) following the manufacturer's protocol (June 2012). A DNase digestion step was  
211 included with the RNase-Free DNase Set (Qiagen). Quality and quantity of RNA were checked  
212 on the NanoDrop (Thermo Fisher Scientific) and the 2100 Bioanalyzer (Agilent Technologies).  
213 Library preparation was carried out using the TruSeq® Stranded Total RNA Library Prep Plant  
214 with RiboZero probes (96 Samples. Illumina, #20020611). Indexed libraries were normalized,  
215 pooled and size selected to 320bp +/- 5% using the Pippin Prep HT instrument to generate  
216 libraries with mean inserts of 200 bp, and sequenced on the Illumina HiSeq2500 platform with  
217 V4 chemistry at the University of Minnesota Genomics Center. Reads from all 17 libraries were  
218 paired-end 125 bp.

219

220

221

222 *Transcriptome data processing and assembly*

223 We processed raw reads for all 98 transcriptome datasets (except *Bienertia sinuspersici*) used in  
224 this study (88 ingroups + 10 outgroups; Table S1). Sequencing errors in raw reads were corrected  
225 with Rcorrector (Song and Florea 2015) and reads flagged as uncorrectable were removed.  
226 Sequencing adapters and low-quality bases were removed with Trimmomatic v0.36  
227 (SLIDINGWINDOW:4:5 LEADING:5 TRAILING:5 MINLEN:25; Bolger et al. 2014).  
228 Additionally, reads were filtered for chloroplast and mitochondrial reads with Bowtie2 v 2.3.2  
229 (Langmead and Salzberg 2012) using publicly available Caryophyllales organelle genomes from  
230 the Organelle Genome Resources database (RefSeq; [Pruitt et al. 2007]; last accessed on October  
231 17, 2018) as references. Read quality was assessed with FastQC v 0.11.7  
232 (<https://www.bioinformatics.babraham.ac.uk/projects/fastqc/>). Finally, overrepresented  
233 sequences detected with FastQC were discarded. *De novo* assembly was carried out with Trinity  
234 v 2.5.1 (Haas et al. 2013) with default settings, but without in silico normalization. Assembly  
235 quality was assessed with Transrate v 1.0.3 (Smith-Unna et al. 2016). Low quality and poorly  
236 supported transcripts were removed using individual cut-off values for three contig score  
237 components of Transrate: 1) proportion of nucleotides in a contig that agrees in identity with the  
238 aligned read,  $s(\text{Cnuc}) \leq 0.25$ ; 2) proportion of nucleotides in a contig that have one or more  
239 mapped reads,  $s(\text{Ccov}) \leq 0.25$ ; and 3) proportion of reads that map to the contig in correct  
240 orientation,  $s(\text{Cord}) \leq 0.5$ . Furthermore, chimeric transcripts (*trans-self* and *trans-multi-gene*)  
241 were removed following the approach described in Yang and Smith (2013) using *Beta vulgaris*  
242 as the reference proteome, and percentage similarity and length cutoffs of 30 and 100,  
243 respectively. In order to remove isoforms and assembly artifacts, filtered reads were remapped to  
244 filtered transcripts with Salmon v 0.9.1 (Patro et al. 2017) and putative genes were clustered with

245 Corset v 1.07 (Davidson and Oshlack 2014) using default settings, except that we used a minimal  
246 of five reads as threshold to remove transcripts with low coverage (-m 5). Only the longest  
247 transcript of each putative gene inferred by Corset was retained. Our previous benchmark study  
248 have shown that Corset followed by selecting the longest transcript for each putative gene  
249 performed well in reducing isoforms and assembly artifacts, especially in polyploid species  
250 (Chen et al. 2019). Filtered transcripts were translated with TransDecoder v 5.0.2 (Haas et al.  
251 2013) with default settings and the proteome of *Beta vulgaris* and *Arabidopsis thaliana* to  
252 identify open reading frames. Finally, translated amino acid sequences were further reduced with  
253 CD-HIT v 4.7 (-c 0.99; [Fu et al. 2012]) to remove near-identical amino acid sequences.

254

#### 255 *Homology and orthology inference*

256 Initial homology inference was carried out following Yang and Smith (2014) with some  
257 modification. First, an all-by-all BLASTN search was performed on coding sequences (CDS)  
258 using an *E* value cutoff of 10 and max\_target\_seqs set to 100. Raw BLAST output was filtered  
259 with a hit fraction of 0.4. Then putative homologs groups were clustered using MCL v 14-137  
260 (van Dongen 2000) with a minimal minus log-transformed *E* value cutoff of 5 and an inflation  
261 value of 1.4. Finally, only clusters with a minimum of 25 taxa were retained. Individual clusters  
262 were aligned using MAFFT v 7.307 (Katoh and Standley 2013) with settings ‘-genafpair -  
263 maxiterate 1000’. Aligned columns with more than 90% missing data were removed using Phyx  
264 (Brown et al. 2017). Homolog trees were built using RAxML v 8.2.11 (Stamatakis 2014) with a  
265 GTR-CAT model and clade support assessed with 200 rapid bootstrap (BS) replicates. Spurious  
266 or outlier long tips were detected and removed with TreeShrink v 1.0.0 (Mai and Mirarab 2018).  
267 Monophyletic and paraphyletic tips that belonged to the same taxon were removed keeping the

268 tip with the highest number of characters in the trimmed alignment. After visual inspection of ca.  
269 50 homolog trees, internal branches longer than 0.25 were likely representing deep paralogs.  
270 These branches were cut apart, keeping resulting subclades with a minimum of 25 taxa.  
271 Homolog tree inference, tip masking, outlier removal, and deep paralog cutting was carried out  
272 for a second time using the same settings to obtain final homologs. Orthology inference was  
273 carried out following the ‘monophyletic outgroup’ approach from Yang and Smith (2014),  
274 keeping only ortholog groups with at least 25 ingroup taxa. The ‘monophyletic outgroup’  
275 approach filters for clusters that have outgroup taxa being monophyletic and single-copy, and  
276 therefore filters for single- and low-copy genes. It then roots the gene tree by the outgroups,  
277 traverses the rooted tree from root to tip, and removes the side with less taxa when gene  
278 duplication is detected at any given node.

279

### 280 *Chloroplast assembly*

281 Although DNase treatment is carried out to remove genomic DNA, due to its high copy number,  
282 chloroplast sequences are often carried over in RNA-seq libraries. In addition, as young leaf  
283 tissue was used for RNA-seq, RNA from chloroplast genes are expected to be represented,  
284 especially in libraries prepared using a RiboZero approach. To investigate phylogenetic signal  
285 from plastome sequences, *de novo* assemblies were carried out with the Fast-Plast v.1.2.6  
286 pipeline ( <https://github.com/mrmckain/Fast-Plast>) using the organelle reads from the filtering  
287 step. No complete or single-contig plastomes were obtained. Filtered contigs produced by  
288 Spades v 3.9.0 (Bankevich et al. 2012) were mapped to the closest available reference plastome  
289 (with an Inverted Repeat removed; Table S3) and manually edited in Geneious v.11.1.5 (Kearse  
290 et al. 2012) to produce final oriented contigs.

291

292

*Assessment of recombination*

293 Coalescent species tree methods assume that there is no recombination within loci and free  
294 recombination between loci. To determine the presence of recombination in our dataset, we used  
295 the  $\Phi$  (pairwise homoplasy index) test for recombination, as implemented in PhiPack (Bruen et  
296 al. 2006). We tested recombination on the final set of ortholog alignments (with a minimum of  
297 25 taxa) with the default sliding window size of 100 bp.

298

299

*Nuclear phylogenetic analysis*

300 We used concatenation and coalescent-based methods to reconstruct the phylogeny of  
301 Amaranthaceae s.l. Sequences from final orthologs were aligned with MAFFT, columns were  
302 trimmed with Phyx requiring a minimal occupancy of 30%, and alignments with at least 1,000  
303 characters and 99 out of 105 taxa were retained. We first estimated a maximum likelihood (ML)  
304 tree of the concatenated matrix with RAxML using a partition-by-gene scheme with GTR-CAT  
305 model for each partition and clade support assessed with 200 rapid bootstrap (BS) replicates. To  
306 estimate a coalescent-based species tree, first we inferred individual ML gene trees using  
307 RAxML with a GTR-CAT model and 200 BS replicates to assess clade support. Individual gene  
308 trees were then used to estimate a species tree with ASTRAL-III v5.6.3 (Zhang et al. 2018b)  
309 using local posterior probabilities (LPP; Sayyari and Mirarab 2016) to assess clade support.

310

311

*Detecting and visualizing nuclear gene tree discordance*

312 To explore discordance among gene trees, we first calculated the internode certainty all (ICA)  
313 value to quantify the degree of conflict on each node of a target tree (i.e. species tree) given

314 individual gene trees (Salichos et al. 2014). In addition, we calculated the number of conflicting  
315 and concordant bipartitions on each node of the species trees. We calculated both the ICA scores  
316 and the number of conflicting/concordant bipartitions with Phyparts (Smith et al. 2015), mapping  
317 against the estimated ASTRAL species trees, using individual gene trees with BS support of at  
318 least 50% for the corresponding node. Additionally, in order to distinguish strong conflict from  
319 weakly supported branches, we evaluated tree conflict and branch support with Quartet Sampling  
320 (QS; Pease et al. 2018) using 100 replicates. Quartet Sampling subsamples quartets from the  
321 input tree and alignment and assess the confidence, consistency, and informativeness of each  
322 internal branch by the relative frequency of the three possible quartet topologies (Pease et al.  
323 2018)

324         Furthermore, in order to visualize conflict, we built a cloudogram using DensiTree v2.2.6  
325 (Bouckaert and Heled 2014). We filtered the final ortholog alignments to include only 41 species  
326 (38 ingroup and 3 outgroups) in order to include as many orthologs as possible while  
327 representing all main clades of Amaranthaceae s.l. (see results). Individual gene trees were  
328 inferred as previously described. Trees were time-calibrated with TreePL v1.0 (Smith and  
329 O'Meara 2012) by fixing the crown age of Amaranthaceae s.l. to 66–72.1 based on a pollen  
330 record of *Polyporina cribraria* from the late Cretaceous (Maastrichtian; Srivastava 1969), and  
331 the root for the reduced 41-species dataset (most common recent ancestor of Achatocarpaceae  
332 and Aizoaceae) was set to 95 Ma based on the time-calibrated plastome phylogeny of  
333 Caryophyllales from Yao et al. (2019).

334

335

336

337 *Chloroplast phylogenetic analysis*

338 Assembled contigs (excluding one inverted repeat region) were aligned with MAFFT with the  
339 setting ‘--auto’. Two samples (*Dysphania schraderiana* and *Spinacia turkestanica*) were  
340 removed due to low sequence occupancy. Using the annotations of the reference genomes (Table  
341 S3), the coding regions of 78 genes were extracted and each gene alignment was visually  
342 inspected in Geneious to check for potential misassemblies. From each gene alignment taxa with  
343 short sequences (i.e. < 50% of the aligned length) were removed and realigned with MAFFT.  
344 The genes *rpl32* and *ycf2* were excluded from downstream analyses due to low taxon occupancy  
345 (Table S4). For each individual gene we performed extended model selection (Kalyaanamoorthy  
346 et al. 2017) followed by ML gene tree inference and 1,000 ultrafast bootstrap replicates for  
347 branch support (Hoang and Chernomor 2018) in IQ-Tree v.1.6.1 (Nguyen et al. 2015). For the  
348 concatenated matrix we searched for the best partition scheme (Lanfear et al. 2012) followed by  
349 ML gene tree inference and 1,000 ultrafast bootstrap replicates for branch support in IQ-Tree.  
350 Additionally, we evaluated branch support with QS using 1,000 replicates and gene tree  
351 discordance with PhyParts in the ML and species tree. Finally, to identify the origin of the  
352 chloroplast reads (i.e. genomic or RNA), we predicted RNA editing from CDS alignments using  
353 PREP (Mower 2009) with the alignment mode (PREP-aln), and a cutoff value of 0.8.

354

355 *Species network analysis using a reduced 11-taxon dataset*

356 We inferred species networks that model ILS and gene flow using a maximum pseudo-likelihood  
357 approach (Yu and Nakhleh 2015). Species network searches were carried out with PhyloNet  
358 v.3.6.9 (Than et al. 2008) with the command ‘InferNetwork\_MPL’ and using the individual gene  
359 trees as input. Due to computational restrictions, and given our main focus was to search for



360 potential reticulating events among major clades of Amaranthaceae s.l., we reduced our taxon  
361 sampling to one outgroup and ten ingroup taxa including two representative species from each of  
362 the five well-supported major lineages in Amaranthaceae s.l. (see results). We filtered the final  
363 105-taxon ortholog alignments to include genes that have all 11 taxa [referred herein as 11-  
364 taxon(net) dataset]. After realignment and trimming we kept genes with a minimum of 1,000  
365 aligned base pairs and individual ML gene trees were inferred with RAxML with a GTR-  
366 GAMMA model and 200 bootstrap replicates. We carried out 10 independent network searches  
367 allowing for up to five hybridization events for each search. To estimate the optimum number of  
368 hybridizations, first we optimized the branch lengths and inheritance probabilities and computed  
369 the likelihood of the best scored network from each of the five maximum hybridization events  
370 searches. Network likelihoods were estimated given the individual gene trees, as implemented in  
371 Yu et al. (2012), using the command ‘CalGTProb’ in PhyloNet. Then, we performed model  
372 selection using the bias-corrected Akaike information criterion (AICc; Sugiura 1978), and the  
373 Bayesian information criterion (BIC; Schwarz 1978). The number of parameters was set to the  
374 number of branch lengths being estimated plus the number of hybridization probabilities being  
375 estimated. The number of gene trees used to estimate the likelihood was used to correct for finite  
376 sample size. To compare network models to bifurcating trees, we also estimated ML and  
377 coalescent-based species trees as well as a chloroplast tree with the same taxon sampling used in  
378 the network searches. Tree inferences were carried out as previously described for the ML,  
379 coalescent-based, and chloroplast trees, respectively.

380

381

382

383 *Hypothesis testing and detecting introgression using four-taxon datasets*

384 Given the signal of multiple clades potentially involved in hybridization events detected by

385 PhyloNet (see results), we next conducted quartet analyses to explore a single event at a time.

386 First, we further reduced the 11-taxon(net) dataset to six taxa that included one outgroup genome

387 (*Mesembryanthemum crystallinum*) and one ingroup from each of the five major ingroup clades:

388 *Amaranthus hypochondriacus* (genome), *Beta vulgaris* (genome), *Chenopodium quinoa*

389 (genome), *Caroxylon vermiculatum* (transcriptome), and *Polycnemum majus* (transcriptome) to

390 represent Amaranthaceae s.s., Betoideae, 'Chenopods I', 'Chenopods II' and Polycnemoideae,

391 respectively. We carried out a total of ten quartet analyses using all ten four-taxon combinations

392 that included three out of five ingroup species and one outgroup. We filtered the final set of 105-

393 taxon ortholog alignments for genes with all four taxa for each combination and inferred

394 individual gene trees as described before. For each quartet we carried out the following analyses.

395 We first estimated a species tree with ASTRAL and explored gene tree conflict with PhyParts.

396 We then explored individual gene tree resolution by calculating the Tree Certainty (TC) score

397 (Salichos et al. 2014) in RAxML using the majority rule consensus tree across the 200 bootstrap

398 replicates. Next, we explored potential correlation between TC score and alignment length, GC

399 content and alignment gap proportion using a linear regression model in R v.3.6.1 (R Core Team

400 2019). Finally, we tested for the fit of gene trees to the three possible rooted quartet topologies

401 for each gene using the approximately unbiased (AU) tests (Shimodaira 2002). We carried out

402 ten constraint searches for each of three topologies in RAxML with the GTR-GAMMA model,

403 then calculated site-wise log-likelihood scores for the three constraint topologies in RAxML

404 using the GTR-GAMMA and carried out the AU test using Consel v.1.20 (Shimodaira and

405 Hasegawa 2001). In order to detect possible introgression among species of each quartet, first we

406 estimated a species network with PhyloNet using a full maximum likelihood approach (Yu et al.  
407 2014) with 100 independent searches while optimizing the likelihood of the branch lengths and  
408 inheritance probabilities for every proposed species network. Furthermore, we also carried out  
409 the ABBA/BABA test to detect introgression (Green et al. 2010); Durand et al. 2011; Patterson  
410 et al. 2012) in each quartet. We calculated the  $D$ -statistic and associated  $z$  score for the null  
411 hypothesis of no introgression ( $D = 0$ ) following each quartet ASTRAL species tree for taxon  
412 order assignment using 100 jackknife replicates and a block size of 10,000 bp with evobiR v1.2  
413 (Blackmon and Adams) in R.

414         Additionally, to visualize any genomic patterns of the phylogenetic history of *Beta*  
415 *vulgaris* regarding its relationship with Amaranthaceae s.s. and Chenopodiaceae, we first  
416 identified syntenic regions between the genomes of *Beta vulgaris* and the outgroup  
417 *Mesembryanthemum crystallinum* using the SynNet pipeline  
418 (<https://github.com/zhaotao1987/SynNet-Pipeline>; Zhao and Schranz 2019). We used  
419 DIAMOND v.0.9.24.125 (Buchfink et al. 2015) to perform all-by-all inter- and intra-pairwise  
420 protein searches with default parameters, and MCScanX (Wang et al. 2012) for pairwise synteny  
421 block detection with default parameters, except match score (-k) that was set to five. Then, we  
422 plot the nine chromosomes of *Beta vulgaris* by assigning each of the 8,258 orthologs of the  
423 quartet composed of *Mesembryanthemum crystallinum* (outgroup), *Amaranthus*  
424 *hypochondriacus*, *Beta vulgaris*, and *Chenopodium quinoa* (BC1A) to synteny blocks and to one  
425 of the three possible quartet topologies based on best likelihood score.

426

427

428 *Assessment of substitutional saturation, codon usage bias, compositional heterogeneity, and*  
429 *model of sequence evolution misspecification*

430 We refiltered the final 105-taxon ortholog alignments to again include genes that have the same  
431 11 taxa (referred herein as 11-taxon(tree) dataset used for the species network analyses. We  
432 realigned individual genes using MACSE v.2.03 (Ranwez et al. 2018) to account for codon  
433 structure and frameshifts. Codons with frameshifts were replaced with gaps, and ambiguous  
434 alignment sites were removed using GBLOCKS v0.9b (Castresana 2000) while accounting for  
435 codon alignment (-t=c -b1=6 -b2=6 -b3=2 -b4=2 -b5=h). After realignment and removal of  
436 ambiguous sites, we kept genes with a minimum of 300 aligned base pairs. To detect potential  
437 saturation, we plotted the uncorrected genetic distances against the inferred distances as  
438 described in Philippe and Forterre (1999). The level of saturation was determined by the slope of  
439 the linear regression between the two distances where a shallow slope (i.e  $< 1$ ) indicates  
440 saturation. We estimated the level of saturation by concatenating all genes and dividing the first  
441 and second codon positions from the third codon positions. We calculated uncorrected, and  
442 inferred distances with the TN93 substitution model using APE v5.3 (Paradis and Schliep 2019)  
443 in R. To determine the effect of saturation in the phylogenetic inferences we estimated individual  
444 gene trees using three partition schemes. We inferred ML trees with an unpartitioned alignment,  
445 a partition by first and second codon positions, and the third codon positions, and by removing  
446 all third codon positions. All tree searches were carried out in RAxML with a GTR+GAMMA  
447 model and 200 bootstrap replicates. A species tree for each of the three data schemes was  
448 estimated with ASTRAL and gene tree discordance was examined with PhyParts.

449 Codon usage bias was evaluated using a correspondence analysis of the Relative  
450 Synonymous Codon Usage (RSCU), which is defined as the number of times a particular codon

451 is observed relative to the number of times that the codon would be observed in the absence of  
452 any codon usage bias (Sharp and Li 1986). RSCU for each codon in the 11-taxon concatenated  
453 alignment was estimated with CodonW v.1.4.4 (Peden 1999). Correspondence analysis was  
454 carried out using FactoMineR v1.4.1(Lê et al. 2008) in R. To determine the effect of codon usage  
455 bias in the phylogenetic inferences we estimated individual gene trees using codon-degenerated  
456 alignments. Alignments were recoded to eliminate signals associated with synonymous  
457 substitutions by degenerating the first and third codon positions using ambiguity coding using  
458 DEGEN v1.4 (Regier et al. 2010; Zwick et al. 2012). Gene tree inference and discordance  
459 analyses were carried out on the same three data schemes as previously described.

460 To examine the presence of among-lineage compositional heterogeneity, individual genes  
461 were evaluated using the compositional homogeneity test that uses a null distribution from  
462 simulations as proposed by Foster (2004). We performed the compositional homogeneity test by  
463 optimizing individual gene trees with a GTR-GAMMA model and 1,000 simulations in P4  
464 (Foster 2004). To assess if compositional heterogeneity had an effect in species tree inference  
465 and gene tree discordance, gene trees that showed the signal of compositional heterogeneity were  
466 removed from saturation and codon usage analyses and the species tree and discordance analyses  
467 were rerun.

468 To explore the effect of sequence evolution model misspecification, we reanalyzed the  
469 datasets from the saturation and codon usage analyses using inferred gene trees that accounted  
470 for model selection. We performed extended model selection followed by ML gene tree  
471 inference and 1,000 ultrafast bootstrap replicates for branch support in IQ-Tree. Species tree  
472 inference, conflict analysis and removal of genes with compositional heterogeneity were carried  
473 out as previously described.

474 Finally, we also used amino acid alignments from MACSE to account for substitutional  
475 saturation. Amino acid positions with frameshifts were replaced with gaps, and ambiguous  
476 alignment sites were removed with Phyx requiring a minimal occupancy of 30%. We inferred  
477 individual gene trees with IQ-tree to account for a model of sequence evolution and carried out  
478 species tree inference, conflict analysis, and removal of genes with compositional heterogeneity  
479 as described for the nucleotide alignments.

480

#### 481 *Polytomy test*

482 To explore if the gene tree discordance among the main clades of Amaranthaceae s.l. could be  
483 explained by polytomies instead of bifurcating nodes, we carried out the polytomy test by  
484 Sayyari and Mirarab (2018) as implemented in ASTRAL. This test uses quartet frequencies to  
485 assess whether a branch should be replaced with a polytomy while accounting for ILS. We  
486 performed the polytomy test using the gene trees inferred from the saturation and codon usage  
487 analyses [11-taxon(tree) dataset]. Because this test can be sensitive to gene tree error (Syyari and  
488 Mirarab 2018), we ran the analyses using the original gene trees and also using gene trees where  
489 branches with less than 75% of bootstrap support were collapsed.

490

#### 491 *Coalescent simulations*

492 To investigate if gene tree discordance can be explained by ILS alone, we carried out coalescent  
493 simulations similar to Cloutier et al. (2019) An ultrametric species tree with branch lengths in  
494 mutational units ( $\mu T$ ) was estimated by constraining an ML tree search of the 11-taxon(net)  
495 concatenated alignment (from individual MAFFT gene alignment) to the ASTRAL species tree  
496 topology with a GTR+GAMMA model while enforcing a strict molecular clock in PAUP v4.0a

497 (build 165; Swofford 2002). The mutational branch lengths from the constrained tree and branch  
498 lengths in coalescent units ( $\tau = T/4N_e$ ) from the ASTRAL species trees were used to estimate the  
499 population size parameter theta ( $\Theta = \mu T/\tau$ ; Degnan and Rosenberg 2009) for internal branches.  
500 Terminal branches were set with a population size parameter theta of one. We used the R  
501 package Phybase v. 1.4 (Liu and Yu 2010) which uses the formula from Rannala and Yang  
502 (2003) to simulate 10,000 gene trees using the constraint tree and the estimated theta values.  
503 Then the tree-to-tree distances using the Robinson and Foulds (1981) metric was calculated  
504 between the species tree and each gene tree and compared with the distribution of tree-to-tree  
505 distances between the species tree and the simulated gene tree. Tree-to-tree distances were  
506 calculated using the R package Phangorn v2.5.3 (Schliep 2011). We ran simulations in seven  
507 species trees and associated gene tree distribution to represent the trees and gene tree  
508 distributions from the saturation, codon usage and model selection analyses that accounted for  
509 branch length variation in the species trees and individual gene tree inference. Following  
510 Maureira-Butler et al. (2008), if the tree-to-tree distances between the species trees and gene  
511 trees were larger than 95% of the distribution of tree-to-tree distances of the species trees and the  
512 simulated gene trees then ILS alone is considered unlikely to explain the gene tree heterogeneity.

513

#### 514 *Test of anomaly zone*

515 Anomaly zone occurs where a set of short internal branches in the species tree produces gene  
516 trees that differ from the species tree more frequently than those that are concordant [ $a(x)$ ; as  
517 defined in equation 4 of Degnan and Rosenberg (2006)]. To explore if gene tree discordance  
518 observed in Amaranthaceae s.l. is a product of the anomaly zone, we estimated the boundaries of  
519 the anomaly zone [ $a(x)$ ; as defined in equation 4 of Degnan and Rosenberg (2006)] for the

520 internal nodes of the species tree. Here,  $x$  is the branch length (coalescent units) in the species  
521 tree that has a descendant internal branch. If the length of the descendant internal branch ( $y$ ) is  
522 smaller than  $a(x)$ , then the internode pair is in the anomaly zone and is likely to produce anomaly  
523 gene trees (AGTs). We carried out the calculation of  $a(x)$  following Linkem et al. (2016) in the  
524 same 11-taxon(tree) ASTRAL species trees used for coalescent simulations to account for branch  
525 length variation. Additionally, to establish the frequency of gene trees that were concordant with  
526 the estimated species trees, we quantified the frequency of all 105 possible rooted gene trees  
527 (when clades of Amaranthaceae s.l. are monophyletic). We calculated tree-to-tree distances  
528 between the 105 possible topologies and all 5,936 gene trees and counted how many times a  
529 topology had a distance of zero among the set of gene trees.

530

531

## RESULTS

532

533

### *Transcriptome sequencing, assembly, translation, and quality control*

534

535

536

537

538

539

540

541

542

We generated 17 new transcriptomes of Amaranthaceae s.l. for this study. Raw reads are available from the NCBI Sequence Read Archive (BioProject: XXXX; Table S2). The number of raw read pairs ranged from 17 to 27 million. For the 16 samples processed using RiboZero organelle reads accounted for 15% to 52% of read pairs (Table S2). For *Tidestromia oblongifolia* that poly-A enrichment was carried out in library prep with ~5% of raw reads were from organelle (Table S2). Number of final CDS (after quality control and redundancy reduction) used for all-by-all homology search can be found in Table S5. The final number of orthologs from the ‘monophyletic outgroup’ approach was 13,024 with a mean of 9,813 orthologs per species (Table S6).



543

544

*Assessment of recombination*

545 The test for recombination,  $\Phi$ , identified 82 out of the 13,024 genes from the final set of  
546 orthologs (with a minimum of 25 taxa) with a strong signal of recombination ( $p \leq 0.05$ ; Table  
547 S7). Alignments that showed signal of recombination were removed from all subsequent  
548 phylogenetic analyses.

549

550

*Analysis of the nuclear dataset of Amaranthaceae s.l.*

551 The final set of nuclear orthologous genes included 936 genes with at least 99 out of 105 taxa  
552 and 1,000 bp in aligned length after removal of low occupancy columns (the 105-taxon dataset,  
553 Fig. S1). The concatenated matrix consisted of 1,712,054 columns with a gene and character  
554 occupancy of 96% and 82%, respectively. The species tree from ASTRAL and the concatenated  
555 ML tree from RAxML recovered the exact same topology with most clades with the highest  
556 support [i.e. bootstrap percentage (BS) = 100, local posterior probabilities (LPP) = 1; Fig. 2; Figs  
557 S2–S3]. Our phylogenetic analyses recovered Chenopodiaceae as monophyletic with the  
558 subfamilies and relationships among them similar to Kadereit et al. (2017). Betoideae was placed  
559 as sister of Chenopodiaceae, while Polycnemoideae was placed as sister (BS = 97, LPP = 0.98)  
560 to the clade composed of Chenopodiaceae and Betoideae. Finally, we recovered Amaranthaceae  
561 s.s. with an overall topology concordant to Kadereit et al. (2017), with the exception of *Iresine*  
562 that is placed among the Aervoids (Fig. 2; Figs S2–S3).

563

564

565

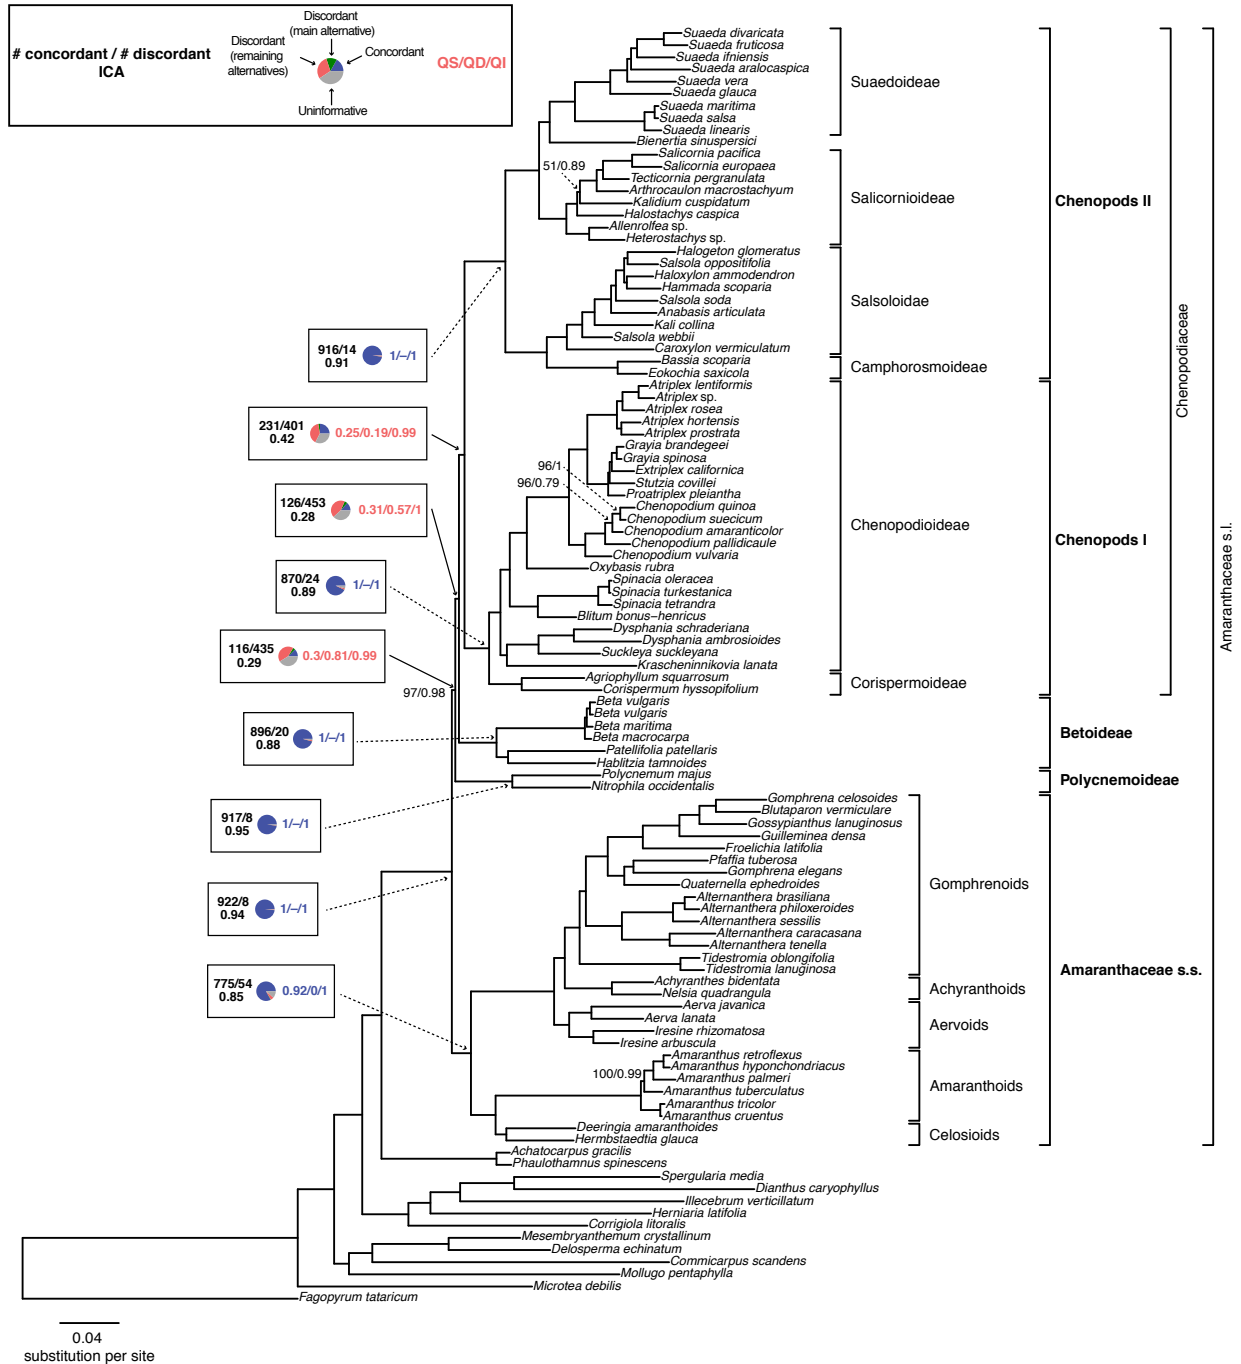

566

567 **FIGURE 2.** Maximum likelihood phylogeny of Amaranthaceae s.l. inferred from RAxML  
 568 analysis of the concatenated 936-nuclear gene supermatrix. All nodes have full support  
 569 (Bootstrap = 100/Local posterior probability = 100) unless noted next to nodes. Boxes contain  
 570 gene tree conflict and Quartet Sampling (QS) scores for major clades (see Figs S2–S3 for all  
 571 node scores). In each box, numbers on the upper left indicate the number of gene trees  
 572 concordant/conflicting with that node in the species tree, and the number on the lower left

573 indicate the Internode Certainty All (ICA) score. Pie charts present the proportion of gene trees  
574 that support that clade (blue), the proportion that support the main alternative bifurcation (green),  
575 the proportion that support the remaining alternatives (red), and the proportion (conflict or  
576 support) that have < 50% bootstrap support (gray). Number on the right of the pie chart indicates  
577 QS scores: Quartet concordance/Quartet differential/Quartet informativeness. QS scores in blue  
578 indicate support for individual major clades of Amaranthaceae s.l., while red scores indicate  
579 strong support for alternative relationships among them. Branch lengths are in number of  
580 substitutions per site (scale bar on the bottom).

581

582         The conflict analyses confirmed the monophyly of Amaranthaceae s.l. with most gene  
583 trees being concordant (922; ICA= 0.94) and full QS support (1/-/1; i.e. all sampled quartets  
584 supported that branch), but also recovered significant discordance in the backbone of the family  
585 (Fig. 2; Figs S2–S3). The monophyly of Chenopodiaceae s.s. was supported only by 231 out of  
586 632 informative gene trees (ICA = 0.42) and the QS score (0.25/0.19/0.99) suggested weak  
587 quartet support with a skewed frequency for an alternative placement of two well-defined clades  
588 within Chenopodiaceae s.s., herein referred to as ‘Chenopods I’ and ‘Chenopods II’ (Fig. 2; Figs  
589 S2–S3). ‘Chenopods I’ and ‘Chenopods II’ were each supported by the majority of gene trees,  
590 870 (ICA = 0.89) and 916 (ICA = 0.91), respectively and full QS support. The placement of  
591 Betoideae and Polycnemoideae as successive sisters of Chenopodiaceae also showed significant  
592 conflict (Fig. 2; Figs S2–S3). The placement of Betoideae was supported only by 126 out of 579  
593 informative gene trees (ICA = 0.28) and the QS score (0.31/0.57/1) also showed low support  
594 with the presence of supported alternative placements close to the same frequency. Similarly, the  
595 placement of Polycnemoideae was supported by only 116 out of 511 informative gene trees (ICA  
596 = 0.29) and low QS support (0.3/0.81/0.99) with alternative topologies close to equal  
597 frequencies. The monophyly of Amaranthaceae s.s. was highly supported by 755 gene trees (ICA

598 =0.85) and the QS score (0.92/0/1) also indicated high quartet support and no support for a single  
599 alternative topology.

600 Congruent with the overall low support in the backbone of Amaranthaceae s.l. from BS,  
601 LPP, ICA, QS, and PhyParts, the cloudogram of 41 species using 1,242 gene trees also showed  
602 significant conflict in the backbone of Amaranthaceae s.l. where no clear pattern can be  
603 identified regarding the relationships of the five main clades of Amaranthaceae s.l. (Fig. 3). In  
604 summary, analysis of nuclear genes recovered five well-supported clades in Amaranthaceae s.l.:  
605 Amaranthaceae s.s., Betoideae, ‘Chenopods I’, ‘Chenopods II’, and Polycnemoideae. However,  
606 relationships among these five clades showed a high level of conflict among genes (ICA scores  
607 and gene counts [pie charts]) and among subsampled quartets (QS scores), despite having high  
608 support from both BS and LPP scores.

609

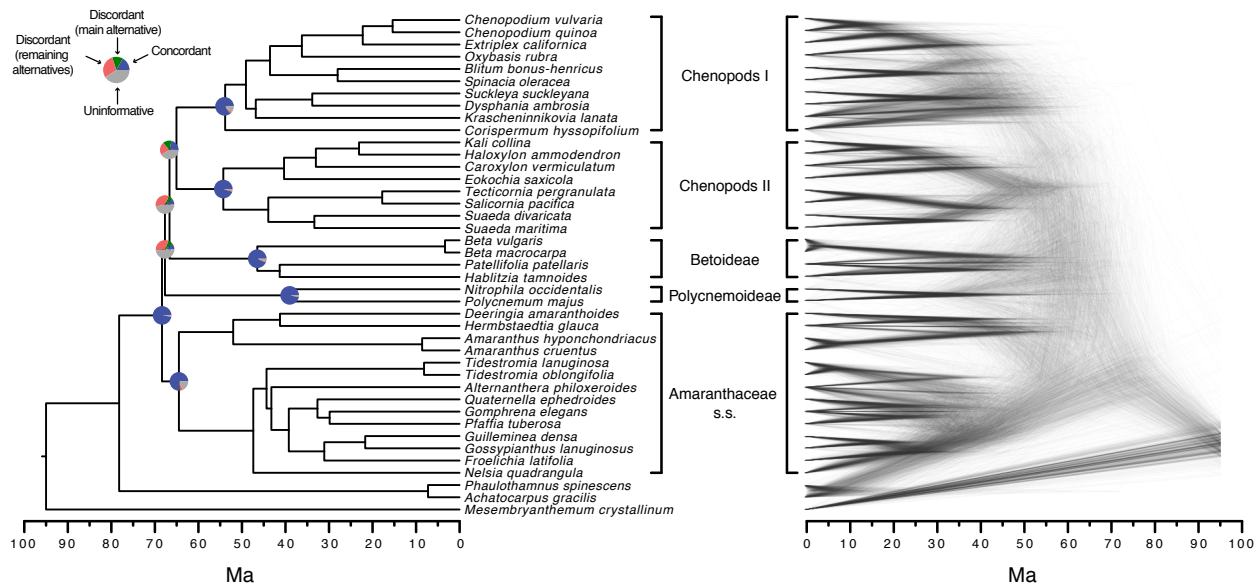

610

611 **FIGURE 3.** ASTRAL species tree (left) and cloudogram (right) inferred from 1,242 nuclear genes  
612 for the 41-taxon dataset of Amaranthaceae s.l. Pie charts on nodes present the proportion of gene  
613 trees that support that clade (blue), the proportion that support the main alternative bifurcation

614 (green), the proportion that support the remaining alternatives (red), and the proportion (conflict  
615 or support) that have < 50% bootstrap support (gray).

616

617 *Chloroplast phylogenetic analysis of Amaranthaceae s.l.*

618 The final alignment from 76 genes included 103 taxa and 55,517 bp in aligned length. The ML  
619 tree recovered the same five main clades within Amaranthaceae s.l. with the highest support (BS  
620 = 100; Fig. 4; Figs S4–S5). Within each main clade, relationships were fully congruent with  
621 (Kadereit et al. 2017) and mostly congruent with our nuclear analyses. However, the relationship  
622 among the five main clades differed from the nuclear tree. Here, Betoideae was retrieved as  
623 sister (BS = 100) of 'Chenopods I', while Amaranthaceae s.s. and Polycnemoideae were also  
624 recovered as sister clades (BS = 100). Furthermore, the clade formed by Betoideae and  
625 'Chenopods I', and Amaranthaceae s.s. and Polycnemoideae were recovered as sister groups (BS  
626 = 73), leaving 'Chenopods II' as sister to the former two. Conflict analysis confirmed the  
627 monophyly of Amaranthaceae s.l. with 51 out of 76 gene trees supporting this clade (ICA = 0.29)  
628 and full QS support (1/–/1). On the other hand, and similar to the nuclear phylogeny, conflict and  
629 QS analyses showed significant discordance in the backbone of the family (Fig. 4; Figs S4–S5).  
630 The sister relationship of Betoideae and 'Chenopods I' was supported by only 20 gene trees (ICA  
631 = 0.06), but it had a strong support from QS (0.84/0.88/0/94). The relationship between  
632 Amaranthaceae s.s. and Polycnemoideae was supported only by 15 gene trees (ICA = 0.07),  
633 while QS showed weak support (0.41/0.21/0.78) with signals of a supported secondary  
634 evolutionary history. The clade uniting Betoideae, 'Chenopods I', Amaranthaceae s.s., and  
635 Polycnemoideae was supported by only four-gene trees, with counter-support from both QS (-  
636 0.29/0.42/0.75) and ICA (-0.03), suggesting that most gene trees and sampled quartets supported  
637 alternative topologies. RNA editing prediction analysis revealed editing sites only on CDS

638 sequences of reference plastome genomes (Table S3), suggesting that cpDNA reads in RNA-seq  
 639 libraries come from RNA rather than DNA contamination from incomplete DNase digestion  
 640 during sample processing.

641

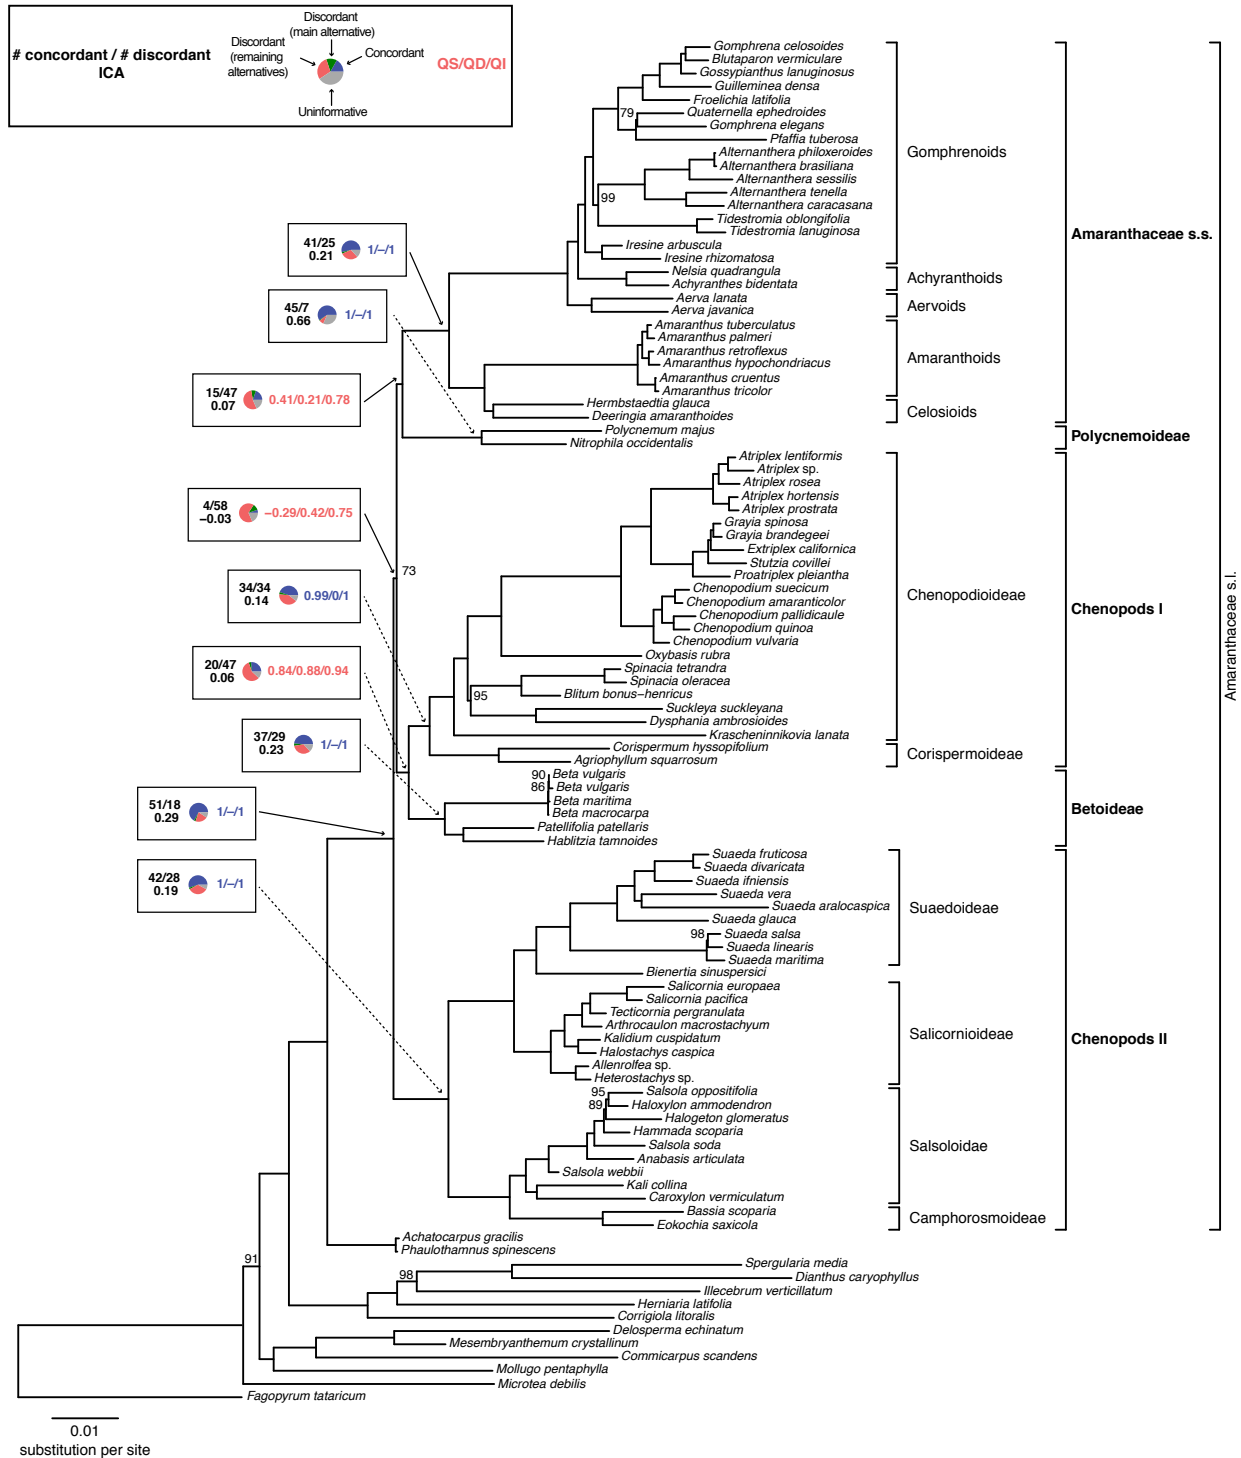

642

643 **FIGURE 4.** Maximum likelihood phylogeny of Amaranthaceae s.l. inferred from IQ-tree analysis  
644 of concatenated 76-chloroplast gene supermatrix. All nodes have full support (Bootstrap =  
645 100/Local posterior probability = 100) unless noted next to nodes. Boxes contain gene tree  
646 conflict and Quartet Sampling (QS) scores for major clades (see Figs S2–S3 for all node scores).  
647 In each box, numbers on the upper left indicate the number of gene trees concordant/conflicting  
648 with that node in the species tree, and the number on the lower left indicate the Internode  
649 Certainty All (ICA) score. Pie charts present the proportion of gene trees that support that clade  
650 (blue), the proportion that support the main alternative bifurcation (green), the proportion that  
651 support the remaining alternatives (red), and the proportion (conflict or support) that have < 50%  
652 bootstrap support (gray). Numbers on the right of the pie chart indicate QS scores: Quartet  
653 concordance/Quartet differential/Quartet informativeness. QS scores in blue indicate support for  
654 individual major clades of Amaranthaceae s.l., while red scores indicate strong support for  
655 alternative relationships among them. Branch lengths are in number of substitutions per site  
656 (scale bar on the bottom).

657

658 *Species network analysis of Amaranthaceae s.l.*

659 Due to the computational limit of species network analyses, we reduced our full 105-taxon  
660 dataset to ten ingroup taxa plus one outgroup taxon. In this reduced dataset two taxa were used to  
661 represent the diversity for each of the five well-supported ingroup clades within Amaranthaceae  
662 s.l. The reduced 11-taxon(net) dataset included 4,138 orthologous gene alignments with no  
663 missing taxon and a minimum of 1,000 bp (aligned length after removal of low occupancy  
664 columns). The 11-taxon(net) ASTRAL species tree was congruent with the 105-taxon tree, while  
665 both the nuclear and chloroplast ML trees from concatenated supermatrices both had different  
666 topologies than their corresponding 105-taxon trees (Fig. 5). PhyloNet identified up to five  
667 hybridization events among the clades of Amaranthaceae s.l. (Fig. 5), with the best model having  
668 five hybridization events involving all five clades (Table 1). ‘Chenopods II’ was involved in  
669 hybridization events in all networks with one to five hybridization events. Model selection



670 indicated that any species network was a better model than the bifurcating nuclear or chloroplast  
 671 trees (Table 1).

672

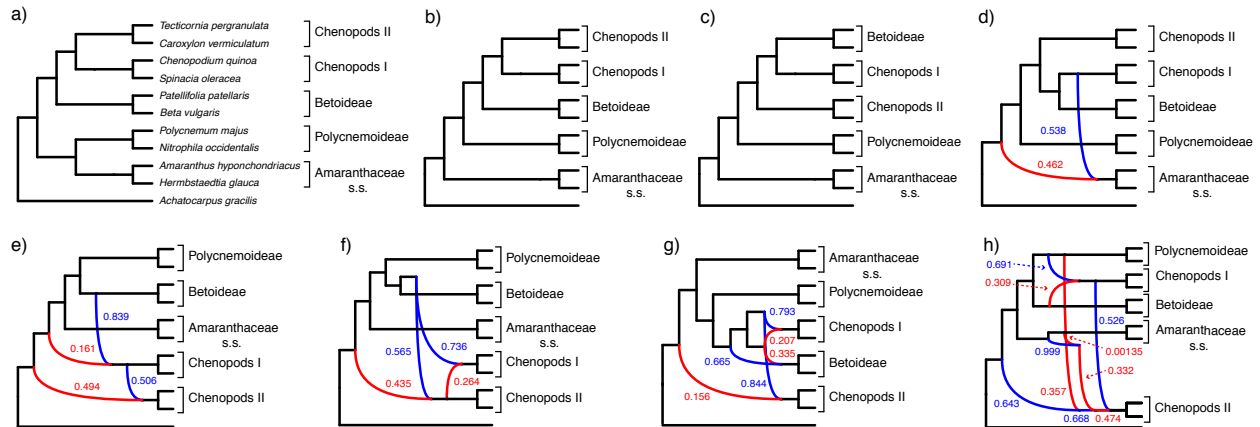

673

674 **FIGURE 5.** Species trees and species networks of the reduced 11-taxon(net) dataset of  
 675 Amaranthaceae s.l. a) Maximum likelihood phylogeny inferred from RAxML analysis of the  
 676 concatenated 4,138-nuclear gene supermatrix. b) Species tree inferred with ASTRAL using  
 677 4,138 nuclear genes. c) Maximum likelihood tree inferred from IQ-tree analysis of the  
 678 concatenated 76-chloroplast gene supermatrix. d–h). Best species network inferred from  
 679 PhyloNet pseudolikelihood analyses with 1 to 5 maximum number of hybridizations. Red and  
 680 blue indicates the minor and major edges, respectively, of hybrid nodes. Number next to the  
 681 branches indicates inheritance probabilities for each hybrid node.

682

683

684

685

686

687

688

689



690 **TABLE 1.** Model selection between maximum number of hybridizations in species networks searches.

691

| Topology            | Maximum        | Number of      | ln(L)               | Parameters | Number      | AICc               | $\Delta$ AICc | BIC                | $\Delta$ BIC |
|---------------------|----------------|----------------|---------------------|------------|-------------|--------------------|---------------|--------------------|--------------|
|                     | number of      | Number of      |                     |            |             |                    |               |                    |              |
|                     | hybridizations | hybridizations |                     |            | of loci     |                    |               |                    |              |
|                     | allowed        | hybridizations |                     |            |             |                    |               |                    |              |
| RAxML ML tree       | NA             | NA             | -24486.33124        | 19         | 4138        | 49048.84703        | 20589.66354   | 49130.89387        | 20546.62287  |
| ASTRAL species tree | NA             | NA             | -23448.39741        | 19         | 4138        | 46972.97939        | 18513.79589   | 47055.02622        | 18470.75522  |
| Chloroplast ML tree | NA             | NA             | -24568.33287        | 19         | 4138        | 49212.8503         | 20753.66681   | 49294.89713        | 20710.62614  |
| Network 1           | 1              | 1              | -21177.79113        | 21         | 4138        | 42439.80675        | 13980.62326   | 42530.46958        | 13946.19859  |
| Network 2           | 2              | 2              | -17275.62523        | 23         | 4138        | 34643.51881        | 6184.335324   | 34742.79372        | 6158.522728  |
| Network 3           | 3              | 2              | -16741.99114        | 23         | 4138        | 33576.25064        | 5117.067147   | 33675.52555        | 5091.254551  |
| Network 4           | 4              | 3              | -15415.80012        | 25         | 4138        | 30931.91638        | 2472.73289    | 31039.79943        | 2455.528435  |
| <b>Network 5</b>    | <b>5</b>       | <b>5</b>       | <b>-14171.37996</b> | <b>29</b>  | <b>4138</b> | <b>28459.18349</b> | <b>0</b>      | <b>28584.27099</b> | <b>0</b>     |

692

693

694

695

696

697

698

699

*Four-taxon analyses*

700 To test for hybridization events one at a time, we further reduced the 11-taxon(net) dataset to 10

701 four-taxon combinations that each included one outgroup and one representative each from three

702 out of the five major ingroup clades. Between 7,756 and 8,793 genes were used for each quartet

703 analysis (Table 2) and each quartet topology can be found in Figure 6. Only five out of the ten

704 bifurcating quartet species trees (H0 and more frequent gene tree) were compatible with the

705 nuclear species tree inferred from the complete 105-taxon dataset. The other five quartets

706 compatible with the complete-taxon species tree corresponded to the second most frequent

707 quartet gene trees, except for the quartet of Betoideae, ‘Chenopods II’ and Polycnemoideae

708 (PBC2, which correspond to the least frequent gene tree).

709

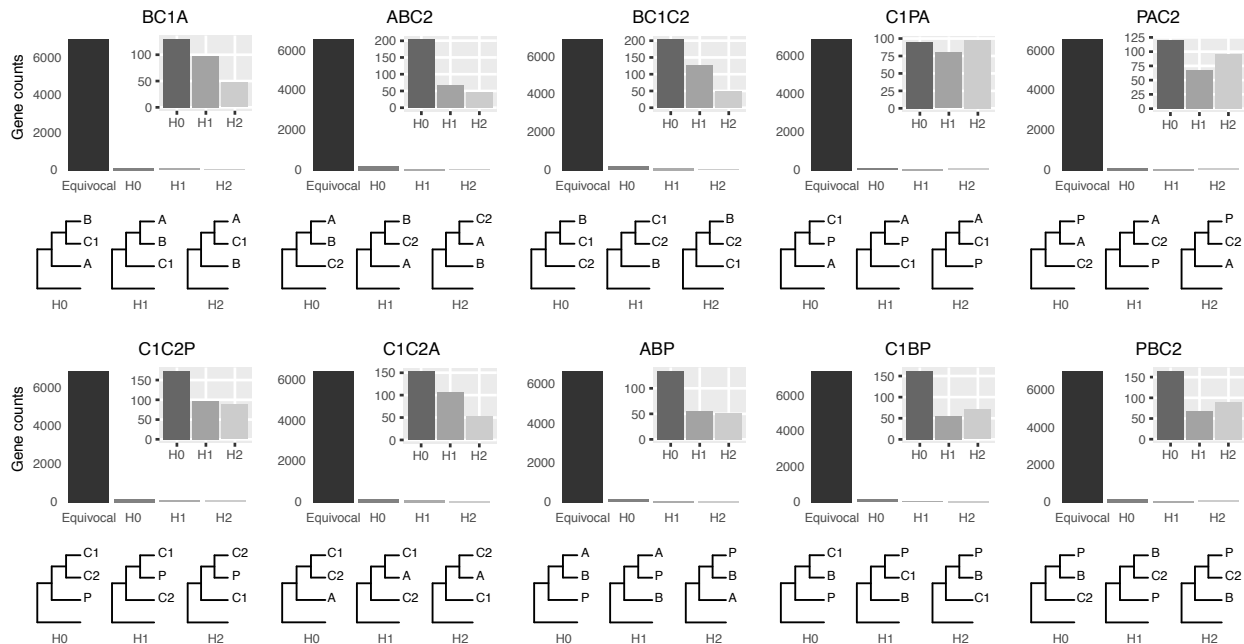

710

711 **FIGURE 6.** Gene counts from Approximate-Unbiased (AU) topology test of the 10 quartets from

712 the five main clades of Amaranthaceae s.l. AU tests were carried out between the three possible

713 topologies of each quartet. H0 represents the ASTRAL species tree of each quartet. Equivocal

714 indicates gene trees that fail to reject all three alternative topologies for a quartet with  $p \leq 0.05$ .  
715 Gene counts for each of the three alternative topologies represent gene trees supporting  
716 unequivocally one topology by rejecting the other two alternatives with  $p \leq 0.05$ . Insets represent  
717 gene count only for unequivocally topology support. Each quartet is named following the species  
718 tree topology, where the first two species are sister to each other (all topologies can be found in  
719 Figure S1). A = Amaranthaceae s.s. (represented by *Amarantus hypocondriacus*), B = Betoideae  
720 (*Beta vulgaris*), C1 = Chenopods I (*Chenopodium quinoa*), C2 = Chenopods II (*Caroxylum*  
721 *vermiculatum*), P = Polycnemoideae (*Polycnemonum majus*). All quartets are rooted with  
722 *Mesembryanthemum crystallinum*.

723

724           Similar to the 105-taxon and the 11-taxon(net) datasets, the conflict analyses recovered  
725 significant conflict among all three possible rooted quartet topologies in all ten quartets. In each  
726 of the ten quartets, the ASTRAL species tree topology (H0) was the most frequent among  
727 individual gene trees (raw counts) but only with 35%–41% of occurrences while the other two  
728 topologies varied between similar or slightly skewed frequencies (Fig. S6a; Table S8). Gene  
729 counts based on the raw likelihood scores from the constraint analyses showed similar patterns  
730 (Fig. S6b; Table S8). Furthermore, when gene counts were filtered by significant likelihood  
731 support (i.e.  $\Delta\text{AICc} \geq 2$ ), the number of trees supporting each of the three possible topologies  
732 dropped between 34% and 45%, but the species tree remained to be the most frequent topology  
733 for all quartets (Fig. S6b; Table S8). The AU topology tests failed to reject ( $p \leq 0.05$ )  
734 approximately 85% of the gene trees for any of the three possible quartet topologies and rejected  
735 all but a single topology in only 3%–4.5% of cases. Among the unequivocally selected gene  
736 trees, the frequencies among the three alternative topologies were similar to ones based on raw  
737 likelihood scores and overall the species tree was the most common topology for each quartet

738 (Fig 6; Table S8). Furthermore, the topology test clearly showed that most genes were  
739 uninformative for resolving the relationships among the major groups of Amaranthaceae s.l.

740 Across all ten quartets we found that most genes had very low TC scores (for any single  
741 node the maximum TC value is 1; Supplemental Fig. S7), showing that individual gene trees had  
742 also large conflict among bootstrap replicates, which is also a signal of uninformative genes and  
743 is concordant with the AU topology test results. Additionally, the linear models did not show any  
744 significant correlation between TC scores and alignment length, GC content or alignment gapless  
745 (Table S9), suggesting that filtering genes by any of these criteria are unlikely to increase the  
746 information content of the dataset.

747 Species network analyses followed by model selection using each of the four-taxon  
748 datasets showed that in seven out of the ten total quartets, the network with one hybridization  
749 event was a better model than any bifurcating tree topology. However, each of the best three  
750 networks from PhyloNet had very close likelihood scores and no significant  $\Delta$ AICc among them.  
751 For the remaining three quartets the most common bifurcating tree (H0; C1PA, C1BP, PBC2)  
752 was the best model (Table 2; Figs 6, S6, S8).

753

754

755

756

757

758

759

760

761 **TABLE 2.** Model selection between quartet tree topologies and species networks. Trees correspond to each of the three possible quartet  
 762 topologies where H0 is the ASTRAL quartet species tree. Networks correspond to the best three networks for searches with one  
 763 hybridization event allowed.

| Quartet <sup>a</sup> | Topology <sup>b</sup> | ln(L)              | Parameters | Number of loci | AICc               | ΔAICc       | BIC                | ΔBIC        |
|----------------------|-----------------------|--------------------|------------|----------------|--------------------|-------------|--------------------|-------------|
| BC1A                 |                       |                    |            |                |                    |             |                    |             |
|                      | H0                    | 9014.809786        | 5          | 8258           | 18049.62684        | 24.73436754 | 18074.71426        | 14.70279692 |
|                      | H1                    | 9072.456373        | 5          | 8258           | 18164.92002        | 140.0275408 | 18190.00743        | 129.9959702 |
|                      | H2                    | 9073.888783        | 5          | 8258           | 18167.78484        | 142.8923611 | 18192.87225        | 132.8607905 |
|                      | <b>Net 1</b>          | <b>-8998.43945</b> | <b>7</b>   | <b>8258</b>    | <b>18024.89248</b> | <b>0</b>    | <b>18060.01146</b> | <b>0</b>    |
|                      | Net 2                 | 8998.439526        | 7          | 8258           | 18024.89263        | 0.000151947 | 18060.01162        | 0.000151947 |
|                      | Net 3                 | 8998.441478        | 7          | 8258           | 18024.89653        | 0.004056302 | 18060.01552        | 0.004056302 |
| ABC2                 |                       |                    |            |                |                    |             |                    |             |
|                      | H0                    | 8516.854413        | 5          | 7811           | 17053.71651        | 12.87079823 | 17078.52527        | 2.950887757 |
|                      | H1                    | 8581.563051        | 5          | 7811           | 17183.13379        | 142.2880731 | 17207.94254        | 132.3681626 |
|                      | H2                    | 8582.670875        | 5          | 7811           | 17185.34944        | 144.5037223 | 17210.15819        | 134.5838118 |
|                      | <b>Net 1</b>          | <b>8506.415681</b> | <b>7</b>   | <b>7811</b>    | <b>17040.84572</b> | <b>0</b>    | <b>17075.57438</b> | <b>0</b>    |
|                      | Net 2                 | 8506.415769        | 7          | 7811           | 17040.84589        | 0.000176519 | 17075.57456        | 0.000176519 |
|                      | Net 3                 | -8506.42071        | 7          | 7811           | 17040.85577        | 0.010057548 | 17075.58444        | 0.010057548 |
| BC1C2                |                       |                    |            |                |                    |             |                    |             |
|                      | H0                    | 9140.191425        | 5          | 8385           | 18300.39001        | 156.347016  | 18325.55385        | 146.2848258 |
|                      | H1                    | 9201.981045        | 5          | 8385           | 18423.96925        | 279.9262567 | 18449.13309        | 269.8640665 |
|                      | H2                    | 9214.405292        | 5          | 8385           | 18448.81775        | 304.7747517 | 18473.98158        | 294.7125615 |

|       |              |                    |          |             |                    |             |                    |             |
|-------|--------------|--------------------|----------|-------------|--------------------|-------------|--------------------|-------------|
|       | <b>Net 1</b> | <b>9058.014812</b> | <b>7</b> | <b>8385</b> | <b>18144.04299</b> | <b>0</b>    | <b>18179.26902</b> | <b>0</b>    |
|       | Net 2        | 9058.019338        | 7        | 8385        | 18144.05205        | 0.009052497 | 18179.27807        | 0.009052497 |
|       | Net 3        | 9058.024046        | 7        | 8385        | 18144.06146        | 0.018468011 | 18179.28749        | 0.018468011 |
| CIPA  | <b>H0</b>    | <b>8932.927759</b> | <b>5</b> | <b>8134</b> | <b>17885.8629</b>  | <b>0</b>    | <b>17910.87456</b> | <b>0</b>    |
|       | H1           | 8936.145955        | 5        | 8134        | 17892.29929        | 6.436391285 | 17917.31095        | 6.436391285 |
|       | H2           | 8936.481125        | 5        | 8134        | 17892.96963        | 7.106730999 | 17917.98129        | 7.106730999 |
|       | Net 1        | 8932.077808        | 7        | 8134        | 17892.1694         | 6.306498884 | 17927.18227        | 16.30771403 |
|       | Net 2        | 8932.078011        | 7        | 8134        | 17892.16981        | 6.306905172 | 17927.18268        | 16.30812032 |
|       | Net 3        | 8932.078714        | 7        | 8134        | 17892.17121        | 6.308310587 | 17927.18408        | 16.30952573 |
| PAC2  | H0           | 8530.661274        | 5        | 7784        | 17081.33026        | 40.10000797 | 17106.12168        | 30.18704595 |
|       | H1           | -8552.9448         | 5        | 7784        | 17125.89731        | 84.66706025 | 17150.68873        | 74.75409823 |
|       | H2           | 8548.291438        | 5        | 7784        | 17116.59059        | 75.36033576 | 17141.382          | 65.44737374 |
|       | <b>Net 1</b> | <b>8506.607925</b> | <b>7</b> | <b>7784</b> | <b>17041.23025</b> | <b>0</b>    | <b>17075.93463</b> | <b>0</b>    |
|       | Net 2        | 8506.609795        | 7        | 7784        | 17041.23399        | 0.00373969  | 17075.93837        | 0.00373969  |
|       | Net 3        | 8506.618966        | 7        | 7784        | 17041.25233        | 0.02208072  | 17075.95671        | 0.02208072  |
| C1C2P | H0           | 9119.250871        | 5        | 8341        | 18258.50894        | 12.50997925 | 18283.64643        | 2.458344441 |
|       | H1           | 9163.685997        | 5        | 8341        | 18347.37919        | 101.38023   | 18372.51669        | 91.32859519 |
|       | H2           | -9164.83263        | 5        | 8341        | 18349.67246        | 103.6734974 | 18374.80995        | 93.62186263 |
|       | <b>Net 1</b> | <b>9108.992761</b> | <b>7</b> | <b>8341</b> | <b>18245.99896</b> | <b>0</b>    | <b>18281.18809</b> | <b>0</b>    |
|       | Net 2        | 9108.994383        | 7        | 8341        | 18246.00221        | 0.003244509 | 18281.19133        | 0.003244509 |

GENE TREE DISCORDANCE IN PHYLOTRANSCRIPTOMICS

|       |              |                    |          |             |                    |             |                    |             |
|-------|--------------|--------------------|----------|-------------|--------------------|-------------|--------------------|-------------|
|       | Net 3        | 9108.994843        | 7        | 8341        | 18246.00313        | 0.0041636   | 18281.19225        | 0.0041636   |
| C1C2A |              | -                  |          |             |                    |             |                    |             |
|       | H0           | 8447.623029        | 5        | 7756        | 16915.2538         | 63.6063012  | 16940.02717        | 53.70057058 |
|       | H1           | 8520.509174        | 5        | 7756        | 17061.02609        | 209.378593  | 17085.79946        | 199.4728624 |
|       | H2           | 8522.764578        | 5        | 7756        | 17065.5369         | 213.889401  | 17090.31027        | 203.9836704 |
|       | <b>Net 1</b> | <b>8411.816521</b> | <b>7</b> | <b>7756</b> | <b>16851.6475</b>  | <b>0</b>    | <b>16886.3266</b>  | <b>0</b>    |
|       | Net 2        | 8411.819912        | 7        | 7756        | 16851.65428        | 0.006781956 | 16886.33338        | 0.006781956 |
|       | Net 3        | 8411.820308        | 7        | 7756        | 16851.65507        | 0.007573446 | 16886.33417        | 0.007573446 |
| ABP   |              | -                  |          |             |                    |             |                    |             |
|       | H0           | 9008.115816        | 5        | 8206        | 18036.23895        | 3.307596079 | 18061.29474        | 6.711300872 |
|       | H1           | 9015.941176        | 5        | 8206        | 18051.88967        | 18.95831519 | 18076.94546        | 8.939418238 |
|       | H2           | 9014.738462        | 5        | 8206        | 18049.48424        | 16.55288764 | 18074.54003        | 6.533990688 |
|       | <b>Net 1</b> | <b>9002.458846</b> | <b>7</b> | <b>8206</b> | <b>18032.93135</b> | <b>0</b>    | <b>18068.00604</b> | <b>0</b>    |
|       | Net 2        | 9002.460142        | 7        | 8206        | 18032.93395        | 0.002592568 | 18068.00863        | 0.002592568 |
|       | Net 3        | 9002.464397        | 7        | 8206        | 18032.94246        | 0.011102577 | 18068.01714        | 0.011102577 |
| C1BP  |              | -                  |          |             |                    |             |                    |             |
|       | <b>H0</b>    | <b>9557.910518</b> | <b>5</b> | <b>8793</b> | <b>19135.82787</b> | <b>0</b>    | <b>19161.22959</b> | <b>0</b>    |
|       | H1           | 9661.475396        | 5        | 8793        | 19342.95762        | 207.1297559 | 19368.35935        | 207.1297559 |
|       | H2           | 9661.009687        | 5        | 8793        | 19342.0262         | 206.1983365 | 19367.42793        | 206.1983365 |
|       | Net 1        | -9556.24034        | 7        | 8793        | 19140.49343        | 4.665563813 | 19176.05266        | 14.82306554 |
|       | Net 2        | 9556.243036        | 7        | 8793        | 19140.49882        | 4.670955519 | 19176.05805        | 14.82845724 |
|       | Net 3        | 9556.246261        | 7        | 8793        | 19140.50527        | 4.677405326 | 19176.0645         | 14.83490705 |
| PBC2  |              | -                  |          |             |                    |             |                    |             |
|       | <b>H0</b>    | <b>9158.309463</b> | <b>5</b> | <b>8379</b> | <b>18336.62609</b> | <b>0</b>    | <b>18361.78635</b> | <b>0</b>    |

|       |             |   |      |             |             |             |             |
|-------|-------------|---|------|-------------|-------------|-------------|-------------|
| H1    | 9206.127177 | 5 | 8379 | 18432.26152 | 95.63542753 | 18457.42177 | 95.63542753 |
| H2    | 9205.933131 | 5 | 8379 | 18431.87343 | 95.24733612 | 18457.03368 | 95.24733612 |
| Net 1 | 9158.016519 | 7 | 8379 | 18344.04642 | 7.42032489  | 18379.26742 | 17.48107897 |
| Net 2 | 9158.017286 | 7 | 8379 | 18344.04795 | 7.421858749 | 18379.26896 | 17.48261282 |
| Net 3 | 9158.017377 | 7 | 8379 | 18344.04813 | 7.422042036 | 18379.26914 | 17.48279611 |

764 <sup>a</sup>Each quartet is named following the species tree topology, where the first two are sister. A = Amaranthaceae. s.s. (*Amaranthus*  
765 *hypochondriacus*), B = Betoideae (*Beta vulgaris*), C1 = Chenopods I (*Chenopodium quinoa*), C2 = Chenopods II (*Caroxylum*  
766 *vermiculatum*), P = Polycnemoideae (*Polycnemonum majus*).

767 <sup>b</sup>All quartet tree topologies can be found in Figure 6 and quartet network topologies in Figure S8.

768

769

770

771

772

773

774

775

776



777

778 The ABBA/BABA test results showed a significant signal of introgression within each of  
779 the ten quartets (Table 3). The possible introgression was detected between six out of the ten  
780 possible pairs of taxa. Potential introgression between Betoideae and Amaranthaceae s.s.,  
781 ‘Chenopods I’ or ‘Chenopods II’, and between ‘Chenopods I’ and Polycnemoideae was not  
782 detected.

783

784 **TABLE 3.** ABBA/BABA test results of Amaranthaceae s.l. five main groups quartets.

| Quartet (H0) <sup>a</sup> | Number  | Sites in  | Raw D- |        |             |          | P-value | Introgression direction |
|---------------------------|---------|-----------|--------|--------|-------------|----------|---------|-------------------------|
|                           | of loci | alignment | ABBA   | BABA   | statistic   | Z-score  |         |                         |
| BC1A <sup>b</sup>         | 8258    | 12778649  | 287226 | 254617 | 0.06018164  | 41.1085  | ≤ 0.001 | A⇔C1                    |
| ABC2                      | 7811    | 12105324  | 252772 | 376755 | -0.1969463  | 124.4161 | ≤ 0.001 | A⇔C2                    |
| BC1C2                     | 8385    | 13192317  | 306570 | 258349 | 0.08535914  | 54.59751 | ≤ 0.001 | C1⇔C2                   |
| C1PA <sup>b</sup>         | 8134    | 12635201  | 342350 | 286813 | 0.08827124  | 64.62297 | ≤ 0.001 | A⇔P                     |
| PAC2                      | 7784    | 12049734  | 344726 | 405627 | -0.08116313 | 42.88069 | ≤ 0.001 | C2⇔P                    |
| C1C2P <sup>b</sup>        | 8341    | 13127397  | 445384 | 276652 | 0.2336892   | 136.0151 | ≤ 0.001 | C2⇔P                    |
| C1C2A <sup>b</sup>        | 7756    | 12114778  | 396219 | 292561 | 0.1504951   | 101.3243 | ≤ 0.001 | A⇔C2                    |
| ABP                       | 8206    | 12622625  | 276319 | 312060 | -0.06074486 | 36.64264 | ≤ 0.001 | A⇔P                     |
| C1BP <sup>b</sup>         | 8793    | 13712853  | 273286 | 261620 | 0.02180944  | 18.08364 | ≤ 0.001 | B⇔P                     |
| PBC2                      | 8379    | 13074019  | 217549 | 415616 | -0.3128205  | 196.8972 | ≤ 0.001 | C2⇔P                    |

785 <sup>a</sup>Each quartet is named following the species tree topology, where the first two are sister. A =  
786 Amaranthaceae. s.s. (*Amaranthus hypochondriacus*), B = Betoideae (*Beta vulgaris*), C1 =  
787 Chenopods I (*Chenopodium quinoa*), C2 = Chenopods II (*Caroxylum vermiculatum*), P =  
788 Polycnemoideae (*Polycnemonum majus*). H0 topologies can be found in Figure 6

789 <sup>b</sup>Quartet compatible with the complete 105-taxon species trees

790

791 The synteny analysis between the diploid ingroup reference genome *Beta vulgaris* and  
792 the diploid outgroup reference genome *Mesembryanthemum crystallinum* recovered 22,179 (out  
793 of 52,357) collinear genes in 516 syntenic blocks. With the collinear ortholog pair information,  
794 we found that of the 8,258 orthologs of the BC1A quartet 6,941 contained orthologous genes  
795 within 383 syntenic blocks. The distribution of the BC1A quartet topologies along the  
796 chromosomes of *Beta vulgaris* did not reveal any spatial clustering along the chromosomes (Fig.  
797 S9).

798

799 *Assessment of substitutional saturation, codon usage bias, compositional heterogeneity,*  
800 *and sequence evolution model misspecification*

801 We assembled a second 11-taxon(tree) dataset that included 5,936 genes and a minimum of 300  
802 bp (aligned length after removal of low occupancy columns) and no missing taxon. The  
803 saturation plots of uncorrected and predicted genetic distances showed that the first and second  
804 codon position are unsaturated ( $y = 0.8841002x$ ), while the slope of the third codon positions ( $y$   
805  $= 0.5710071x$ ) showed a clear signal of saturation (Fig. S10). The correspondence analyses of  
806 RSCU show that some codons are more frequently used in different species, but overall the  
807 codon usage seems to be randomly dispersed among all species and not clustered by clade (Fig.  
808 S11). This suggests that the phylogenetic signal is unlikely to be driven by differences in codon  
809 usage bias among clades. Furthermore, 549 (~9%) genes showed signal of compositional  
810 heterogeneity ( $p < 0.05$ ) (Table S10). The topology and support (LPP = 1.0) for all branches was  
811 the same for the ASTRAL species trees obtained from the different data schemes while  
812 accounting for saturation, codon usage, compositional heterogeneity, and model of sequence  
813 evolution, and was also congruent with the ASTRAL species tree and concatenated ML from the

814 full-taxon analyses (Fig. 7). In general, the proportion of gene trees supporting each bipartition  
 815 remained the same in every analysis and showed high levels of conflict among the main clades of  
 816 Amaranthaceae s.l. (Fig 7). Gene trees inferred accounting for selection of model of sequence  
 817 evolution had higher bootstrap support resulting in higher proportion of both concordant and  
 818 discordant trees (Fig 7b, 7d, 7e), but the proportion among them is the same as in the gene trees  
 819 that used a single model of sequence evolution (Fig 7a–7c).  
 820

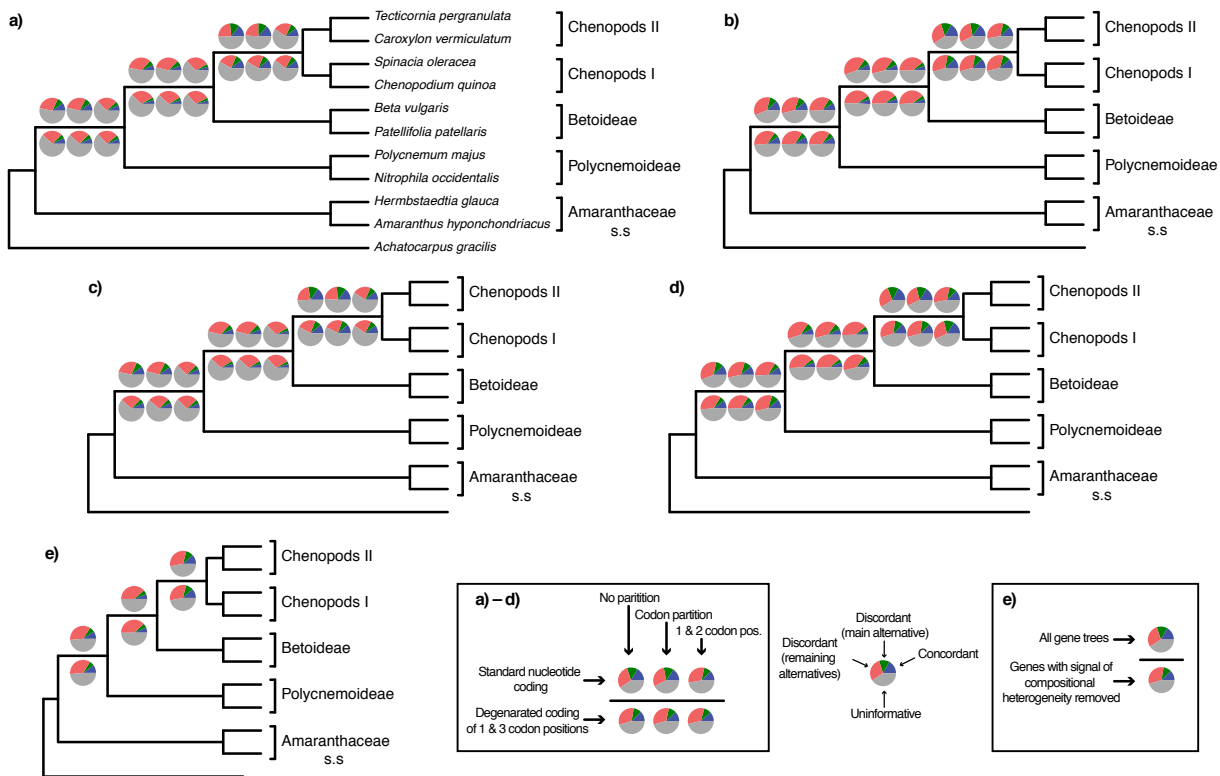

821  
 822 **FIGURE 7.** ASTRAL species trees from the 11-taxon(net) dataset estimated from gene trees  
 823 inferred using multiple data schemes. a) Gene trees inferred with RAxML with a GTR-GAMMA  
 824 model. b) Gene trees inferred with IQ-tree allowing for automatic model selection of sequence  
 825 evolution. c) Gene trees inferred with RAxML with a GTR-GAMMA model and removal of  
 826 genes that had signal of compositional heterogeneity. d) Gene trees inferred with IQ-tree  
 827 allowing for automatic model selection of sequence evolution and removal of genes that had

828 signal of compositional heterogeneity. a–d) Gene trees were inferred with no partition, codon  
829 partition (first and second codon, and third codon) and, only first and second codon positions  
830 (third codon position removed and no partition). Gene trees were inferred using codon  
831 alignments with standard nucleotide coding, and alignments with degenerated coding of the first  
832 and third codon positions. e) All gene trees and gene trees after removal of genes that had signal  
833 of compositional heterogeneity, inferred with IQ-tree using amino acid sequences allowing for  
834 automatic model selection of sequence evolution. Pie charts on nodes present the proportion of  
835 gene trees that support that clade (blue), the proportion that support the main alternative  
836 bifurcation (green), the proportion that support the remaining alternatives (red), and the  
837 proportion (conflict or support) that have < 50% bootstrap support (gray).

838

#### 839 *Polytomy test*

840 The ASTRAL polytomy test resulted in the same bifurcating species tree for the 11-taxon(tree)  
841 dataset and rejected the null hypothesis that any branch is a polytomy ( $p < 0.01$  in all cases).  
842 These results were identical when using gene trees with collapsed branches.

843

#### 844 *Coalescent simulations*

845 The distribution of tree-to-tree distances of the empirical and simulated gene trees to the species  
846 tree largely overlapped in all seven partition schemes tested (Fig. 8), suggesting that ILS alone  
847 was able to largely account for the gene tree heterogeneity seen in the 11-taxon(tree) dataset. The  
848 least overlap between empirical vs. simulated gene trees was observed in the dataset that only  
849 included the first and second codon positions in CDS, and in the amino acid dataset. This can be  
850 attributed to higher gene tree inference error due to removal of informative sites from the third  
851 codon position.

852

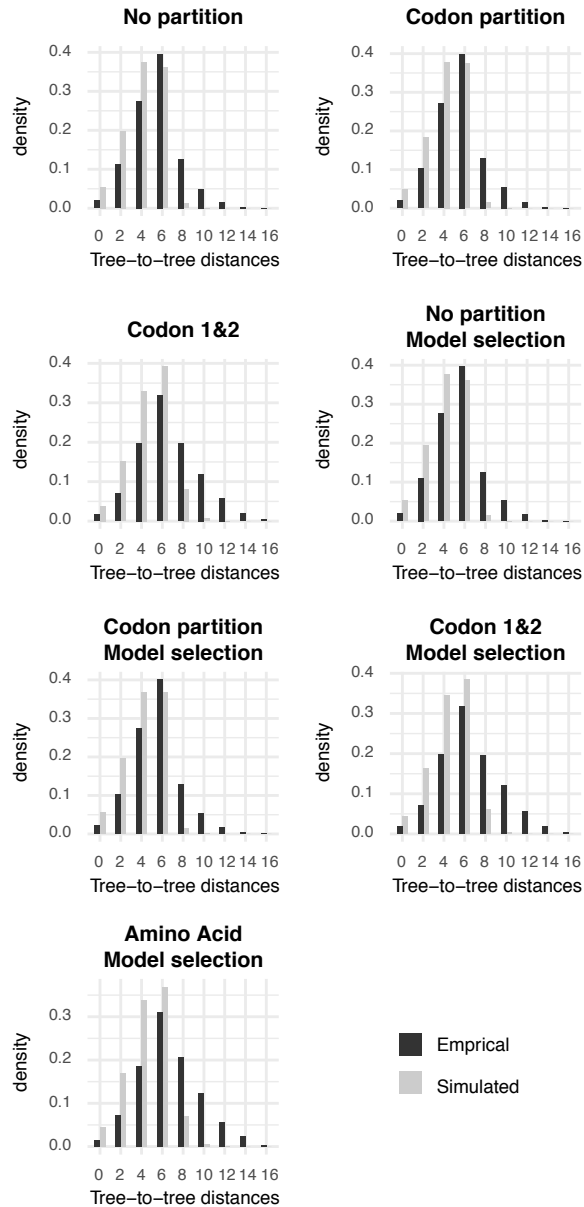

853

854 **FIGURE 8.** Distribution of tree-to-tree distances from empirical gene trees and species tree versus  
855 coalescent simulation. Simulations were carried out using the ASTRAL species trees from the  
856 11-taxon(tree) dataset estimated from gene trees inferred using seven data schemes. Species trees  
857 used for the coalescent simulation can be seen in Figure 9.

858

859

860

861 *Test of anomaly zone*

862 The anomaly zone limit calculations using species trees from the 11-taxon(tree) dataset revealed

863 that two pairs of internodes in the Amaranthaceae s.l. species tree fell into the anomaly zone.

864 These internodes are characterized by having very short branches relative to the rest of the tree.

865 The branch lengths among species trees from the seven different data schemes varied among the

866 trees, but the same internodes were identified under the anomaly zone in all cases. The first pair

867 of internodes is located between the clade comprised of all Amaranthaceae s.l. and the clade that

868 includes Chenopods I, Chenopods II, and Betoideae. The second pair of internodes is located

869 between the clade that includes Chenopods I, Chenopods II, and Betoideae and the clade

870 composed of Chenopods I and Chenopods II (Table 4, Fig. 9).

871

872 **TABLE 4.** Anomaly zone limit calculations in 11-taxon species trees. Bold rows show pair of

873 internodes in the anomaly zone when  $y < a(x)$ .

| Species tree <sup>a</sup> | Clade (x) <sup>b</sup>    | Clade (y) <sup>b</sup> | x             | y             | a(x)          |
|---------------------------|---------------------------|------------------------|---------------|---------------|---------------|
| No partition              | (C1, C2)                  | (C1)                   | 0.1467        | 2.722         | 0.1799        |
|                           | (C1, C2)                  | (C2)                   | 0.1467        | 2.1102        | 0.1799        |
|                           | <b>((C1, C2), B)</b>      | <b>(C1, C2)</b>        | <b>0.1045</b> | <b>0.1467</b> | <b>0.3084</b> |
|                           | ((C1, C2), B)             | (B)                    | 0.1045        | 2.6081        | 0.3084        |
|                           | <b>(((C1, C2), B), P)</b> | <b>((C1, C2), B)</b>   | <b>0.0846</b> | <b>0.1045</b> | <b>0.4003</b> |
|                           | (((C1, C2), B), P)        | (P)                    | 0.0846        | 3.5424        | 0.4003        |
| Codon partition           | (C1, C2)                  | (C1)                   | 0.1433        | 2.6766        | 0.1882        |
|                           | (C1, C2)                  | (C2)                   | 0.1433        | 2.0655        | 0.1882        |
|                           | <b>((C1, C2), B)</b>      | <b>(C1, C2)</b>        | <b>0.0931</b> | <b>0.1433</b> | <b>0.3572</b> |
|                           | ((C1, C2), B)             | (B)                    | 0.0931        | 2.5862        | 0.3572        |
|                           | <b>(((C1, C2), B), P)</b> | <b>((C1, C2), B)</b>   | <b>0.0734</b> | <b>0.0931</b> | <b>0.4669</b> |
|                           | (((C1, C2), B), P)        | (P)                    | 0.0734        | 3.5366        | 0.4669        |
| Codon 1&2                 | (C1, C2)                  | (C1)                   | 0.118         | 1.3092        | 0.26          |
|                           | (C1, C2)                  | (C2)                   | 0.118         | 1.7645        | 0.26          |
|                           | <b>((C1, C2), B)</b>      | <b>(C1, C2)</b>        | <b>0.1009</b> | <b>0.118</b>  | <b>0.3231</b> |
|                           | ((C1, C2), B)             | (B)                    | 0.1009        | 1.6229        | 0.3231        |
|                           | <b>(((C1, C2), B), P)</b> | <b>((C1, C2), B)</b>   | <b>0.0673</b> | <b>0.1009</b> | <b>0.5102</b> |

GENE TREE DISCORDANCE IN PHYLOTRANSCRIPTOMICS

|                                         |                           |                      |               |               |               |
|-----------------------------------------|---------------------------|----------------------|---------------|---------------|---------------|
|                                         | (((C1, C2), B), P)        | (P)                  | 0.0673        | 2.3625        | 0.5102        |
|                                         | (C1, C2)                  | (C1)                 | 0.1439        | 2.1199        | 0.1865        |
|                                         | (C1, C2)                  | (C2)                 | 0.1439        | 2.7013        | 0.1865        |
| No partition -<br>Model selection       | <b>((C1, C2), B)</b>      | <b>(C1, C2)</b>      | <b>0.1079</b> | <b>0.1439</b> | <b>0.2951</b> |
|                                         | ((C1, C2), B)             | (B)                  | 0.1079        | 2.5846        | 0.2951        |
|                                         | <b>(((C1, C2), B), P)</b> | <b>((C1, C2), B)</b> | <b>0.0803</b> | <b>0.1079</b> | <b>0.4242</b> |
|                                         | (((C1, C2), B), P)        | (P)                  | 0.0803        | 3.58          | 0.4242        |
| Codon partition<br>- Model<br>selection | (C1, C2)                  | (C1)                 | 0.1427        | 2.6398        | 0.1896        |
|                                         | (C1, C2)                  | (C2)                 | 0.1427        | 2.0911        | 0.1896        |
|                                         | <b>((C1, C2), B)</b>      | <b>(C1, C2)</b>      | <b>0.0945</b> | <b>0.1427</b> | <b>0.351</b>  |
|                                         | ((C1, C2), B)             | (B)                  | 0.0945        | 2.6252        | 0.351         |
|                                         | <b>(((C1, C2), B), P)</b> | <b>((C1, C2), B)</b> | <b>0.0721</b> | <b>0.0945</b> | <b>0.4758</b> |
|                                         | (((C1, C2), B), P)        | (P)                  | 0.0721        | 3.5978        | 0.4758        |
| Codon 1&2 -<br>Model selection          | (C1, C2)                  | (C1)                 | 0.1232        | 1.9043        | 0.2432        |
|                                         | (C1, C2)                  | (C2)                 | 0.1232        | 1.415         | 0.2432        |
|                                         | <b>((C1, C2), B)</b>      | <b>(C1, C2)</b>      | <b>0.1024</b> | <b>0.1232</b> | <b>0.317</b>  |
|                                         | ((C1, C2), B)             | (B)                  | 0.1024        | 1.7399        | 0.317         |
|                                         | <b>(((C1, C2), B), P)</b> | <b>((C1, C2), B)</b> | <b>0.07</b>   | <b>0.1024</b> | <b>0.4906</b> |
|                                         | (((C1, C2), B), P)        | (P)                  | 0.07          | 2.5666        | 0.4906        |
| Amino Acid -<br>Model selection         | (C1, C2)                  | (C1)                 | 0.115         | 1.887         | 0.269         |
|                                         | (C1, C2)                  | (C2)                 | 0.115         | 1.317         | 0.269         |
|                                         | <b>((C1, C2), B)</b>      | <b>(C1, C2)</b>      | <b>0.122</b>  | <b>0.115</b>  | <b>0.247</b>  |
|                                         | ((C1, C2), B)             | (B)                  | 0.122         | 1.744         | 0.247         |
|                                         | <b>(((C1, C2), B), P)</b> | <b>((C1, C2), B)</b> | <b>0.077</b>  | <b>0.122</b>  | <b>0.444</b>  |
|                                         | (((C1, C2), B), P)        | (P)                  | 0.077         | 2.471         | 0.444         |

874 <sup>a</sup>Species tree topologies can be found in Figure 7.

875 <sup>b</sup> B = Betoideae (*Beta vulgaris*), C1 = Chenopods I (*Chenopodium quinoa*), C2 = Chenopods II  
876 (*Caroxylum vermiculatum*), P = Polycnemoideae (*Polycnemonum majus*).

877

878

879

880

881

882

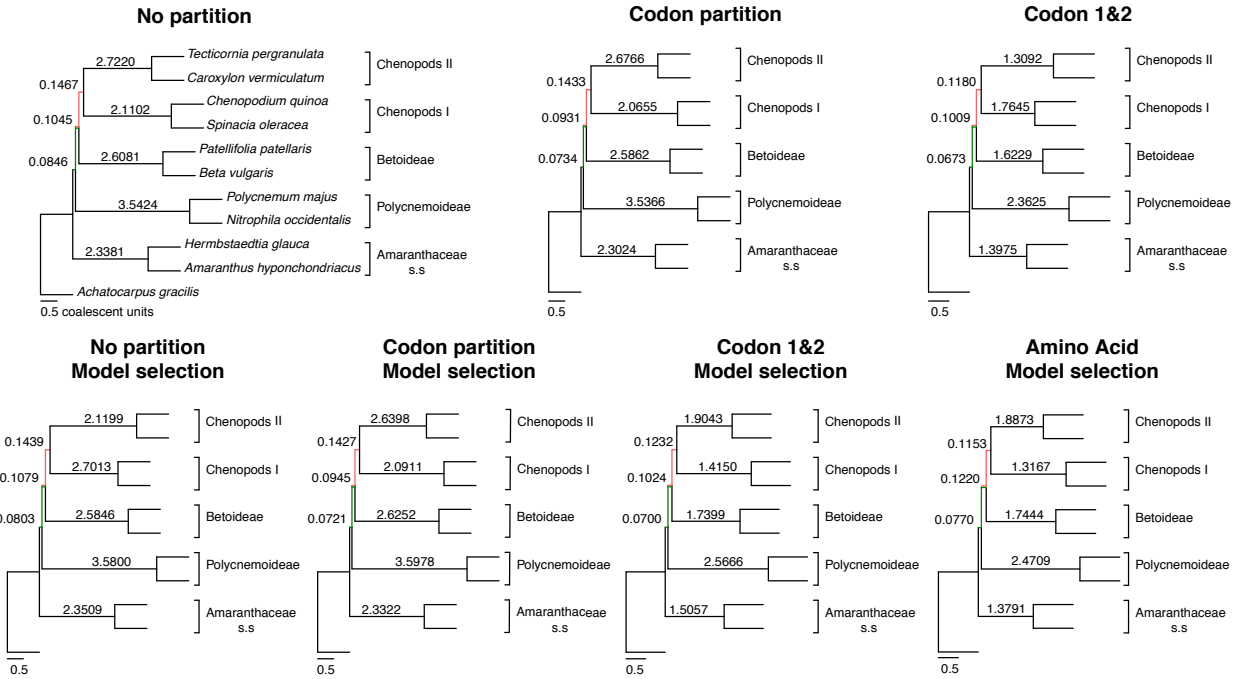

883

884 **FIGURE 9.** ASTRAL species trees from the 11-taxon(tree) dataset estimated from individual  
 885 gene trees inferred with seven data schemes. Number next or above branches represent branch  
 886 length in coalescent units. Colored branches represent pairs of internodes that fall in the anomaly  
 887 zone (see Table 4 for anomaly zone limits).

888

889 The gene tree counts showed that the species tree was not the most common gene tree  
 890 topology in four of the seven data schemes analyzed, as expected for the anomaly zone (Fig.  
 891 S12). When gene trees were inferred with no partition or partitioned by codon, the species tree  
 892 was the fourth most common gene tree topology (119 out of 5,936 gene trees), while the most  
 893 common gene tree topologies occurred between 170 and 149 times (Fig. 10). Similar patterns  
 894 were identified for gene trees inferred while accounting from model of sequence evolution  
 895 selection (Fig. 10). Interestingly, for the gene tree sets inferred using only the first and second  
 896 codons, and amino acids, the species tree was the most common topology.



GENE TREE DISCORDANCE IN PHYLOTRANSCRIPTOMICS

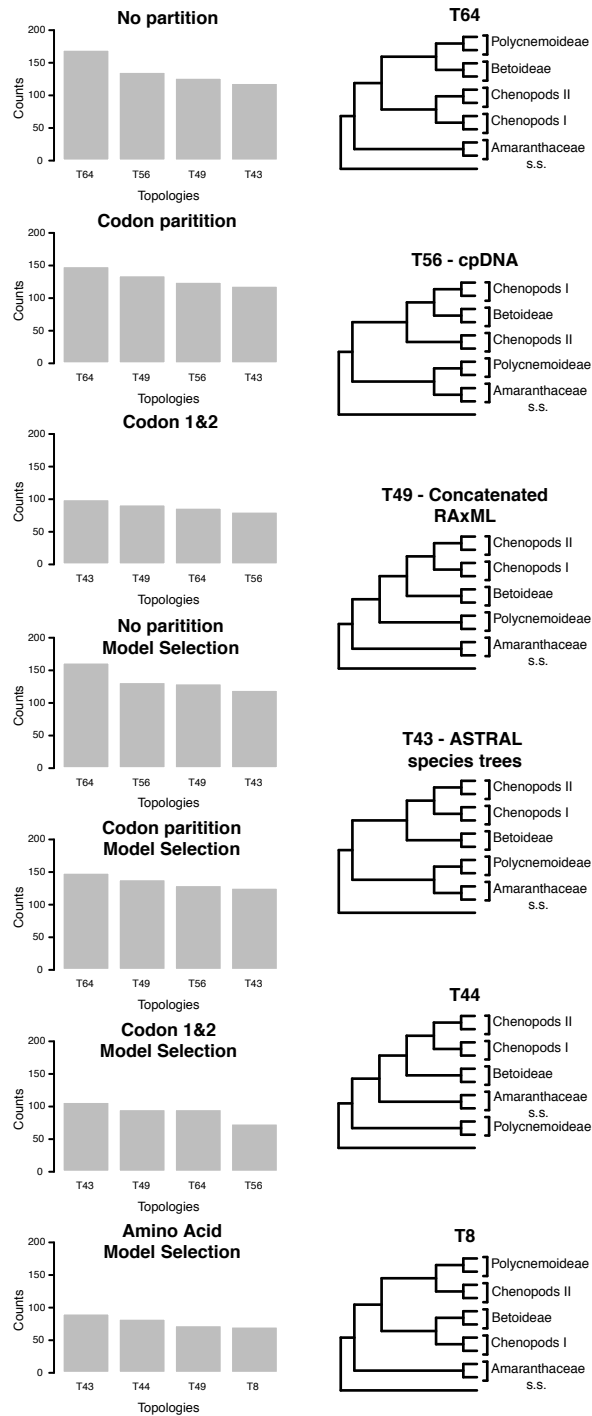

897

898 **FIGURE 10.** Gene tree counts (left) of the four most common topologies (right) of 11-taxon(tree)

899 dataset inferred with seven data schemes. Gene trees that do not support the monophyly of any of

900 the five major clades were ignored.

901

902 **DISCUSSION**

903 Using a phylotranscriptomic dataset in combination with reference genomes representing major  
904 clades, we have shown the prevalence of gene tree discordance in the backbone phylogeny of  
905 Amaranthaceae s.l. Interestingly, we found that this discordance is also present within the  
906 chloroplast dataset. Despite the strong signal of gene tree discordance, we were able to identify  
907 five well-supported major clades within Amaranthaceae s.l. that are congruent with morphology  
908 and previous taxonomic treatments of the group. Using multiple phylogenetic tools and  
909 simulations we comprehensively tested for processes that might have contributed to the gene tree  
910 discordance in Amaranthaceae s.l. Phylogenetic network analyses and ABBA-BABA tests both  
911 supported multiple reticulation events among the five major clades in Amaranthaceae s.l. At the  
912 same time, the patterns of gene tree discordance among these clades can also largely be  
913 explained by uninformative gene trees and ILS. We found evidence that three consecutive short  
914 internal branches produce anomalous trees contributing to the discordance. Molecular evolution  
915 model misspecification (i.e. substitutional saturation, codon usage bias, or compositional  
916 heterogeneity) was less likely to account for the gene tree discordance. Taken together, no single  
917 source can confidently be pointed out to account for the strong signal of gene tree discordance,  
918 suggesting that the discordance results primarily from ancient and rapid lineage diversification.  
919 Furthermore, the backbone of Amaranthaceae s.l. and remains—and probably will remain—  
920 unresolved even with genome-scale data. Our work highlights the need to test for multiple  
921 sources of conflict in phylogenomic analyses and provide a set of recommendations moving  
922 forward in resolving ancient and rapid diversification.

923

924

925 *Five well-supported major clades in Amaranthaceae s.l.*

926 Both our nuclear and chloroplast datasets strongly supported five major clades within  
927 Amaranthaceae s.l.: Amaranthaceae s.s., ‘Chenopods I’, ‘Chenopods II’, Betoideae, and  
928 Polycnemoideae (Figs. 2 & 4). We recovered Amaranthaceae s.s., Betoideae, and  
929 Polycnemoideae as monophyletic, which is consistent with morphology and the most recent  
930 molecular analyses of these lineages (Hohmann et al. 2006; Masson and Kadereit 2013; Di  
931 Vincenzo et al. 2018). In the case of Chenopodiaceae s.s., the nuclear analyses (Fig. 2) suggested  
932 the monophyly of this previously segregated family, but gene tree discordance analyses revealed  
933 high levels of conflict among two well-defined clades (Fig. 2), ‘Chenopods I’ and ‘Chenopods  
934 II’. Moreover, the chloroplast analyses did not support the monophyly of Chenopodiaceae s.s.  
935 While we also find evidence of gene tree discordance in the backbone cpDNA phylogeny (see  
936 below), a sister relationship between ‘Chenopods I’ and Betoideae had strong QS support  
937 (0.84/0.88/0.94; Fig. 4). Weak support and/or conflicting topologies along the backbone on the  
938 Amaranthaceae s.l. characterize all previous molecular studies of the lineage (Fig. 1), even with  
939 hundreds of loci (Walker et al. 2018). On the other hand, all studies support the five major clades  
940 found in our analysis.

941 For the sake of taxonomic stability, we therefore suggest retaining Amaranthaceae s.l.  
942 sensu APG IV (The Angiosperm Phylogeny Group et al. 2016), which includes the previously  
943 recognized Chenopodiaceae. Here we recognize five subfamilies within Amaranthaceae s.l.:  
944 Amaranthoideae representing Amaranthaceae s.s. (incl. Gomphrenoideae Schinz), Betoideae  
945 Ulbr., Chenopodioideae represented as ‘Chenopods I’ here (incl. Corispermoideae Ulbr.),  
946 Polycnemoideae Ulbr., and Salicornioideae Ulbr. represented by ‘Chenopods II’ (incl.  
947 Salsoloideae Ulbr., Suaedoideae Ulbr. and Camphorosmoideae A.J. Scott). The stem ages of

948 these five subfamilies date back to the early Tertiary (Paleocene, Fig. 3) which agrees with dates  
949 based on chloroplast markers (Kadereit et al. 2012; Di Vincenzo et al. 2018; Yao et al. 2019).  
950 Due to the gene tree discordance along the backbone, the geographic origin of *Amaranthaceae*  
951 s.l. remains ambiguous.

952

953 *Gene tree discordance detected among chloroplast genes*

954 Our concatenation-based chloroplast phylogeny (Fig. 4) retrieved the same five major clades of  
955 *Amaranthaceae* s.l. as in the nuclear phylogeny, but the relationships among the major clades are  
956 incongruent with the nuclear phylogeny (Fig. 2). Cytonuclear discordance is a well-known  
957 process in plants and it has been traditionally attributed to reticulate evolution (Rieseberg and  
958 Soltis 1991; Sang et al. 1995; Soltis and Kuzoff 1995). Such discordance continues to be treated  
959 as evidence in support of hybridization in more recent phylogenomic studies that assume the  
960 chloroplast to be a single, linked locus (e.g. Folk et al. 2017; Vargas et al. 2017; Morales-Briones  
961 et al. 2018b; Lee-Yaw et al. 2019). However, cytonuclear discordance can also be attributed to  
962 other processes like ILS (Doyle 1992; Ballard and Whitlock 2004). Recent work shows that  
963 chloroplast protein-coding genes may not necessarily act as a single locus, and high levels of tree  
964 conflict has been detected (Gonçalves et al. 2019; Walker et al. 2019).

965 In *Amaranthaceae* s.l., previous studies based on chloroplast protein-coding genes or  
966 introns (Kadereit et al. 2003; Müller and Borsch 2005; Hohmann et al. 2006; Kadereit et al.  
967 2017) resulted in different relationships among the five main clades and none in agreement with  
968 our 76-gene phylogeny. Our conflict and QS analyses of the chloroplast dataset (Fig. 4; Figs S4–  
969 S5) revealed strong signals of gene tree discordance among the five major clades of  
970 *Amaranthaceae* s.l. The strong conflicting signal in the chloroplast genome may be attributed to

971 heteroplasmy and difference in individual gene phylogenetic information (Walker et al. 2019),  
972 although the exact sources of conflict are yet to be clarified (Gonçalves et al. 2019). Unlike the  
973 results found by Walker et al. (2019), nodes showing conflicting signals in individual gene trees  
974 in our dataset were mostly highly supported (i.e.  $BS \geq 70$ , Fig S4), suggesting that low  
975 phylogenetic information is not the source of conflict in our chloroplast dataset.

976 Our results support previous studies showing RNA-seq data can be a reliable source for  
977 plastome assembly (Smith 2013; Osuna-Mascaró et al. 2018). While the approach has been used  
978 for deep-scale phylogenomic reconstruction in green plants (Gitzendanner et al. 2018), at present  
979 extracting plastome data is not part of routine phylotranscriptomic pipelines. RNA-seq libraries  
980 can contain some genomic DNA due to incomplete digestion during RNA purification (Smith  
981 2013) and given the AT-rich nature of plastomes, this allows plastome DNA to survive the poly-  
982 A selection during mRNA enrichment (Schliesky et al. 2012). However, our results showed that  
983 *Amaranthaceae* s.l. cpDNA assemblies came from RNA rather than DNA contamination  
984 regardless of library preparation strategies. Similarly, Osuna-Mascaró et al. (2018) also found  
985 highly similar plastome assemblies (i.e. general genome structure, and gene number and  
986 composition) from RNA-seq and genomic libraries, supports the idea that plastome genomes are  
987 fully transcribed in photosynthetic eukaryotes (Shi et al. 2016). Here we implemented additional  
988 steps to the Yang and Smith (2014) pipeline to filter chloroplast and mitochondrial reads prior to  
989 *de novo* transcriptome assembly, which allowed us to assemble plastome sequences from RNA-  
990 seq libraries, build a plastome phylogeny, and compare it to gene trees constructed from nuclear  
991 genes. Furthermore, the backbone topology of our cpDNA tree built mainly from RNA-seq data  
992 (97 out of 105 samples) was consistent with a recent complete plastome phylogeny of  
993 Caryophyllales (Yao et al. 2019), showing the potential value of using cpDNA from RNA-seq

994 data. Nonetheless, RNA editing might be problematic when combining samples from RNA and  
995 DNA, especially when trying to resolve phylogenetic relationships among closely related  
996 species.

997

998 *Hybridization*

999 Rapid advances have been made in recent years in developing methods to infer species networks  
1000 in the presence of ILS (reviewed in Elworth et al. 2019). These methods have been increasingly  
1001 used in phylogenetic studies (e.g. Marcussen et al. 2014; Wen et al. 2016a; Copetti et al. 2017);  
1002 Morales-Briones et al. 2018a; Crowl et al. 2019). To date, however, species network inference is  
1003 still computationally intensive and limited to a small number of species and a few hybridization  
1004 events (Hejase and Liu 2016; but see Hejase et al. 2018 and Zhu et al. 2019). Furthermore,  
1005 studies evaluating the performance of different phylogenetic network inference approaches are  
1006 scarce and restricted to simple hybridization scenarios. (Kamneva and Rosenberg 2017) showed  
1007 that likelihood methods like Yu et al. (2014) are often robust to ILS and gene tree error when  
1008 symmetric hybridization (equal genetic contribution of both parents) events are considered, and  
1009 while it usually does not overestimate hybridization events, it fails to detect skewed  
1010 hybridization (unequal genetic contribution of both parents) events in the presence of significant  
1011 ILS. Methods developed to scale to larger numbers of species and hybridizations like the ones  
1012 using pseudo-likelihood approximations (i.e. Solís-Lemus and Ané 2016; Yu and Nakhleh 2015)  
1013 are yet to be evaluated independently, but in the case of Yu and Nakhleh (2015), a method based  
1014 on rooted triples, it has been shown that this method cannot distinguish the correct network when  
1015 other networks can produce the same set of triples (Yu and Nakhleh 2015). The result of our 11-  
1016 taxon(net) phylogenetic analysis using a pseudo-likelihood approach detected up to five

1017 hybridization events involving all five major clades of Amaranthaceae s.l. (Fig. 5). Model  
1018 selection, after calculating the full likelihood of the obtained networks, chose the 5-reticulation  
1019 species as the best model. Also, any species network had a better score than a bifurcating tree  
1020 (Table 1). However, a further look of these hybridization events by breaking the 11-taxon dataset  
1021 into ten quartets showed that full likelihood networks searches with up to one hybridization event  
1022 are indistinguishable from each other (Table 2), resembling a random gene tree distribution. This  
1023 pattern can probably be explained by the high levels of gene tree discordance and lack of  
1024 phylogenetic signal in the inferred quartet gene trees (Fig. 6), suggesting that the 11-taxon(net)  
1025 network searches can potentially overestimate reticulation events due to high levels of gene tree  
1026 error or ILS.

1027         Using the *D*-Statistic (Green et al. 2010; Durand et al. 2011) we also found signals of  
1028 introgression in seven possible directions among the five main groups of Amaranthaceae s.l.  
1029 (Table 3). The inferred introgression events agreed with at least one of the reticulation scenarios  
1030 from the phylogenetic network analysis. However, the *D*-Statistic did not detect any  
1031 introgression that involves Betoideae, which was detected in the phylogenetic network analysis  
1032 with either four or five reticulations events. The *D*-Statistic has been shown to be robust to a  
1033 wide range of divergence times, but it is sensitive to relative population size (Zheng and Janke  
1034 2018), which agrees with the notion that large effective population sizes and short branches  
1035 increase the chances of ILS (Pamilo and Nei 1988) and in turn can dilute the signal for the *D*-  
1036 Statistic (Zheng and Janke 2018). Recently, Elworth et al. (2018) found that multiple or ‘hidden’  
1037 reticulations can cause the signal of the *D*-statistic to be lost or distorted. Furthermore, when  
1038 multiple reticulations are present, the traditional approach of subsetting datasets into quartets can  
1039 be problematic as it largely underestimates *D* values (Elworth et al. 2018). Given short internal

1040 branches in the backbone of Amaranthaceae s.l. and the phylogenetic network results showing  
1041 multiple hybridizations, it is plausible that our  $D$ -statistic may be affected by these issues. Our  
1042 analysis highlights the uncertainty of relying  $D$ -statistic as the only test for detecting reticulation  
1043 events, especially in cases of ancient and rapid diversification.

1044

1045

#### *ILS and the Anomaly Zone*

1046 Incomplete Lineage Sorting, or ILS, is ubiquitous in multi-locus phylogenetic datasets. In its  
1047 most severe cases ILS produces the ‘anomaly zone’, defined as a set of short internal branches in  
1048 the species tree that produce anomalous gene trees (AGTs) that are more likely than the gene tree  
1049 that matches the species tree (Degnan and Rosenberg 2006). Rosenberg (2013) expanded the  
1050 definition of the anomaly zone to require that a species tree contain two consecutive internal  
1051 branches in an ancestor–descendant relationship in order to produce AGTs. To date, only a few  
1052 examples of an empirical anomaly zone have been reported (Linkem et al. 2016; Cloutier et al.  
1053 2019). Furthermore, Huang and Knowles (2009) have pointed out that the gene tree discordance  
1054 produced from the anomaly zone can also be produced by uninformative gene trees and that for  
1055 species trees with short branches the most probable gene tree topology is a polytomy rather than  
1056 an AGT. Our results show that the species tree of Amaranthaceae s.l. have three consecutive  
1057 short internal branches that lay within the limits of the anomaly zone (i.e.  $y < a(x)$ ; Fig. 9; Table  
1058 4). While this is clear evidence that gene tree discordance in Amaranthaceae s.l may be product  
1059 of AGTs, it is important to point out that our quartet analysis showed that most quartet gene trees  
1060 were equivocal (94–96%; Fig. 6), and were therefore uninformative gene trees. Nonetheless, the  
1061 ASTRAL polytomy test rejected a polytomy along the backbone of Amaranthaceae s.l. in any of  
1062 the gene tree sets used. While we did not test for polytomies in individual gene trees, our



1063 ASTRAL polytomy test was also carried using gene trees with branches collapsed if they had  
1064 <75% bootstrap support, and obtained the same species tree with polytomy being rejected.  
1065 Furthermore, we found that for most of the partition schemes tested, the species tree is not the  
1066 most frequent gene tree (Fig. 10). The distribution of gene tree frequency in combination with  
1067 short internal branches in the species tree supports the presence of an anomaly zone in  
1068 Amaranthaceae s.l.

1069

1070 *Considerations in distinguishing sources of gene tree discordance*

1071 With the frequent generation of phylogenomic datasets, the need to explore and disentangle gene  
1072 tree discordance has become a fundamental step to understand the phylogenetic relationships of  
1073 recalcitrant groups across the Tree of Life. Recently, development of tools to identify and  
1074 visualize gene tree discordance has received great attention (e.g. Salichos et al. 2014; Smith et al.  
1075 2015; Huang et al. 2016; Pease et al. 2018). New tools have facilitated the detection of conflict,  
1076 which has led to the development of downstream phylogenetic analyses to attempt to  
1077 characterize it. Although exploring sources of conflicting signal in phylogenomic data is now  
1078 common, this is typically focused on data filtering approaches and its effect on concatenation-  
1079 based vs. coalescent-based tree inference methods (e.g. Alda et al. 2019; Mclean et al. 2019;  
1080 Roycroft et al. 2019). Methods to estimate species trees from phylogenomic dataset while  
1081 accounting for multiple sources of conflict and molecular substitution simultaneously are not  
1082 available, but by combining transcriptomes and genomes, we were able to create a rich and dense  
1083 dataset to start to tease apart alternative hypotheses concerning the sources of conflict in the  
1084 backbone phylogeny of Amaranthaceae s.l. Nonetheless, we could not attribute the strong gene  
1085 tree discordance signal to a single main source. Instead, we found that gene tree heterogeneity

1086 observed in Amaranthaceae s.l. is likely to be explained by a combination of processes, including  
1087 ILS, hybridization, uninformative genes, and molecular evolution model misspecification, that  
1088 might have acted simultaneously and/or cumulatively.

1089 Our results highlight the need to test for multiple sources of conflict in phylogenomic  
1090 analyses, especially when trying to resolve phylogenetic relationships in groups with a long  
1091 history of phylogenetic conflict. We consider that special attention should be put in data  
1092 processing, orthology inference, as well as the informativeness of individual gene trees.  
1093 Furthermore, we need to be aware of the strengths and limitations of different phylogenetic  
1094 methods and be cautious against relying on a single analysis, for example in the usage of  
1095 phylogenetics species networks over coalescent-based species trees (also see Blair and Ané  
1096 2019). While the backbone phylogeny of Amaranthaceae s.l. remains difficult to resolve despite  
1097 employing genome-scale data, a question emerges whether this is an atypical case, or as we  
1098 leverage more phylogenomic datasets and explore gene tree discordance in more detail, we could  
1099 find similar patterns in other groups, especially in those that are products of ancient and rapid  
1100 lineage diversification (Widhelm et al. 2019). Ultimately, such endeavor will be instrumental in  
1101 our fundamental understanding of the biology of the organisms.

1102

#### 1103 **SUPPLEMENTARY MATERIAL**

1104 Data available from the Dryad Digital Repository: [http://dx.doi.org/10.5061/.\[NNNN\]](http://dx.doi.org/10.5061/.[NNNN])

1105

#### 1106 **ACKNOWLEDGMENTS**

1107 The authors thank H. Freitag, J.M. Bena and the Millennium Seed Bank for providing seeds;  
1108 Ursula Martiné for assisting with RNA extraction; Alexandra Crum for help revising the

1109 manuscript; X anonymous reviewers for providing helpful comments; the Minnesota  
1110 Supercomputing Institute (MSI) at the University of Minnesota for providing access to  
1111 computational resources. This work was supported by the University of Minnesota, University of  
1112 Michigan, and the US National Science Foundation (DEB 1354048).

1113

1114

1115

1116

1117

1118

1119

1120

1121

1122

1123

1124

1125

1126

1127

1128

1129

1130

1131

REFERENCES

- 1132
- 1133
- 1134 Alda F., Tagliacollo V.A., Bernt M.J., Waltz B.T., Ludt W.B., Faircloth B.C., Alfaro M.E.,  
1135 Albert J.S., Chakrabarty P. 2019. Resolving Deep Nodes in an Ancient Radiation of  
1136 Neotropical Fishes in the Presence of Conflicting Signals from Incomplete Lineage  
1137 Sorting. *Syst. Biol.* 68:573–593.
- 1138 Arcila D., Ortí G., Vari R., Armbruster J.W., Stiassny M.L.J., Ko K.D., Sabaj M.H., Lundberg J.,  
1139 Revell L.J., Betancur-R. R. 2017. Genome-wide interrogation advances resolution of  
1140 recalcitrant groups in the tree of life. *Nat. Ecol. Evol.* 1:0020.
- 1141 Ballard J.W.O., Whitlock M.C. 2004. The incomplete natural history of mitochondria. *Mol. Ecol.*  
1142 13:729–744.
- 1143 Bankevich A., Nurk S., Antipov D., Gurevich A.A., Dvorkin M., Kulikov A.S., Lesin V.M.,  
1144 Nikolenko S.I., Pham S., Prjibelski A.D., Pyshkin A.V., Sirotkin A.V., Vyahhi N., Tesler  
1145 G., Alekseyev M.A., Pevzner P.A. 2012. SPAdes: A New Genome Assembly Algorithm  
1146 and Its Applications to Single-Cell Sequencing. *J. Comput. Biol.* 19:455–477.
- 1147 Bena M.J., Acosta J.M., Aagesen L. 2017. Macroclimatic niche limits and the evolution of C4  
1148 photosynthesis in Gomphrenoideae (Amaranthaceae). *Bot. J. Linn. Soc.* 184:283–297.
- 1149 Blackmon H., Adams R.A. 2015 EvobiR: Tools for comparative analyses and teaching  
1150 evolutionary biology. doi:10.5281/zenodo.30938

- 1151 Blair C., Ané C. 2019. Phylogenetic Trees and Networks Can Serve as Powerful and  
1152 Complementary Approaches for Analysis of Genomic Data. *Syst. Biol.* syz056,  
1153 <https://doi.org/10.1093/sysbio/syz056>
- 1154 Bolger A.M., Lohse M., Usadel B. 2014. Trimmomatic - a flexible trimmer for Illumina  
1155 sequence data. *Bioinformatics.* 30:2112–2120.
- 1156 Bouckaert R., Heled J. 2014. DensiTree 2: Seeing Trees Through the Forest. *BioRxiv.* 012401.
- 1157 Brown J.W., Walker J.F., Smith S.A. 2017. Phyx - phylogenetic tools for unix. *Bioinformatics.*  
1158 33:1886–1888.
- 1159 Bruen T.C., Philippe H., Bryant D. 2006. A Simple and Robust Statistical Test for Detecting the  
1160 Presence of Recombination. *Genetics.* 172:2665–2681.
- 1161 Buchfink B., Xie C., Huson D.H. 2015. Fast and sensitive protein alignment using DIAMOND.  
1162 *Nat. Methods.* 12:59–60.
- 1163 Buckley T.R., Cordeiro M., Marshall D.C., Simon C. 2006. Differentiating between Hypotheses  
1164 of Lineage Sorting and Introgression in New Zealand Alpine Cicadas (*Maoricicada*  
1165 *Dugdale*). *Syst. Biol.* 55:411–425.
- 1166 Castresana J. 2000. Selection of Conserved Blocks from Multiple Alignments for Their Use in  
1167 Phylogenetic Analysis. *Mol. Biol. Evol.* 17:540–552.
- 1168 Chen L.-Y., Morales-Briones D.F., Passow C.N., Yang Y. 2019. Performance of gene expression  
1169 analyses using de novo assembled transcripts in polyploid species. *Bioinformatics.*  
1170 btz620, <https://doi.org/10.1093/bioinformatics/btz620>

- 1171 Cloutier A., Sackton T.B., Grayson P., Clamp M., Baker A.J., Edwards S.V. 2019. Whole-  
1172 Genome Analyses Resolve the Phylogeny of Flightless Birds (Palaeognathae) in the  
1173 Presence of an Empirical Anomaly Zone. *Syst. Biol.* syz019,  
1174 <https://doi.org/10.1093/sysbio/syz019>
- 1175 Cooper E.D. 2014. Overly simplistic substitution models obscure green plant phylogeny. *Trends*  
1176 *Plant Sci.* 19:576–582.
- 1177 Copetti D., Búrquez A., Bustamante E., Charboneau J.L.M., Childs K.L., Eguiarte L.E., Lee S.,  
1178 Liu T.L., McMahon M.M., Whiteman N.K., Wing R.A., Wojciechowski M.F., Sanderson  
1179 M.J. 2017. Extensive gene tree discordance and hemiplasy shaped the genomes of North  
1180 American columnar cacti. *Proc. Natl. Acad. Sci.* 114:12003–12008.
- 1181 Cox C.J., Li B., Foster P.G., Embley T.M., Civián P. 2014. Conflicting Phylogenies for Early  
1182 Land Plants are Caused by Composition Biases among Synonymous Substitutions. *Syst.*  
1183 *Biol.* 63:272–279.
- 1184 Crowl A.A., Manos P.S., McVay J.D., Lemmon A.R., Lemmon E.M., Hipp A.L. 2019.  
1185 Uncovering the genomic signature of ancient introgression between white oak lineages  
1186 (*Quercus*). *New Phytol.* nph.15842, <https://doi.org/10.1111/nph.15842>
- 1187 Davidson N.M., Oshlack A. 2014. Corset: enabling differential gene expression analysis for de  
1188 novo assembled transcriptomes. *Genome Biol.* 15:57.
- 1189 Degnan J.H., Rosenberg N.A. 2006. Discordance of Species Trees with Their Most Likely Gene  
1190 Trees. *PLoS Genet.* 2:e68.

- 1191 Degnan J.H., Rosenberg N.A. 2009. Gene tree discordance, phylogenetic inference and the  
1192 multispecies coalescent. *Trends Ecol. Evol.* 24:332–340.
- 1193 Di Vincenzo V., Gruenstaeudl M., Nauheimer L., Wondafrash M., Kamau P., Demissew S.,  
1194 Borsch T. 2018. Evolutionary diversification of the African achyranthoid clade  
1195 (Amaranthaceae) in the context of sterile flower evolution and epizoochory. *Ann. Bot.*  
1196 122:69–85.
- 1197 Dohm J.C., Minoche A.E., Holtgräwe D., Capella-Gutiérrez S., Zakrzewski F., Tafer H., Rupp  
1198 O., Sörensen T.R., Stracke R., Reinhardt R., Goesmann A., Kraft T., Schulz B., Stadler  
1199 P.F., Schmidt T., Gabaldón T., Lehrach H., Weisshaar B., Himmelbauer H. 2014. The  
1200 genome of the recently domesticated crop plant sugar beet (*Beta vulgaris*). *Nature.*  
1201 505:546–549.
- 1202 van Dongen S.M. 2000. Graph Clustering by Flow Simulation. PhD diss., Utrecht University.
- 1203 Doyle J.J. 1992. Gene Trees and Species Trees: Molecular Systematics as One-Character  
1204 Taxonomy. *Syst. Bot.* 17:144.
- 1205 Duchêne D.A., Bragg J.G., Duchêne S., Neaves L.E., Potter S., Moritz C., Johnson R.N., Ho  
1206 S.Y.W., Eldridge M.D.B. 2018. Analysis of Phylogenomic Tree Space Resolves  
1207 Relationships Among Marsupial Families. *Syst. Biol.* 67:400–412.
- 1208 Durand E.Y., Patterson N., Reich D., Slatkin M. 2011. Testing for Ancient Admixture between  
1209 Closely Related Populations. *Mol. Biol. Evol.* 28:2239–2252.

- 1210 Eaton D.A.R., Ree R.H. 2013. Inferring Phylogeny and Introgression using RADseq Data: An  
1211 Example from Flowering Plants (Pedicularis: Orobanchaceae). *Syst. Biol.* 62:689–706.
- 1212 Edwards S.V. 2009. Is A New and General Theory of Molecular Systematics Emerging?  
1213 *Evolution.* 63:1–19.
- 1214 Edwards S.V., Xi Z., Janke A., Faircloth B.C., McCormack J.E., Glenn T.C., Zhong B., Wu S.,  
1215 Lemmon E.M., Lemmon A.R., Leaché A.D., Liu L., Davis C.C. 2016. Implementing and  
1216 testing the multispecies coalescent model: A valuable paradigm for phylogenomics. *Mol.*  
1217 *Phylogenet. Evol.* 94:447–462.
- 1218 Elworth R.A.L., Allen C., Benedict T., Dulworth P., Nakhleh L.K. 2018. DGEN: A Test Statistic  
1219 for Detection of General Introgression Scenarios. *WABI.*
- 1220 Elworth R.A.L., Ogilvie H.A., Zhu J., Nakhleh L. 2019. Advances in Computational Methods for  
1221 Phylogenetic Networks in the Presence of Hybridization. In: Warnow T., editor.  
1222 *Bioinformatics and Phylogenetics: Seminal Contributions of Bernard Moret.* Cham:  
1223 Springer International Publishing. p. 317–360.
- 1224 Erfan Sayyari, Siavash Mirarab. 2018. Testing for Polytomies in Phylogenetic Species Trees  
1225 Using Quartet Frequencies. *Genes.* 9:132.
- 1226 Flowers T.J., Colmer T.D. 2015. Plant salt tolerance: adaptations in halophytes. *Ann. Bot.*  
1227 115:327–331.



- 1228 Folk R.A., Mandel J.R., Freudenstein J.V. 2017. Ancestral Gene Flow and Parallel Organellar  
1229 Genome Capture Result in Extreme Phylogenomic Discord in a Lineage of Angiosperms.  
1230 *Syst. Biol.* 66:320-337.
- 1231 Foster P.G. 2004. Modeling Compositional Heterogeneity. *Syst. Biol.* 53:485–495.
- 1232 Fu L., Niu B., Zhu Z., Wu S., Li W. 2012. CD-HIT: accelerated for clustering the next-  
1233 generation sequencing data. *Bioinformatics.* 28:3150–3152.
- 1234 Galtier N., Daubin V. 2008. Dealing with incongruence in phylogenomic analyses. *Philos. Trans.*  
1235 *R. Soc. B Biol. Sci.* 363:4023–4029.
- 1236 Gitzendanner M.A., Soltis P.S., Yi T.-S., Li D.-Z., Soltis D.E. 2018. Plastome Phylogenetics: 30  
1237 Years of Inferences Into Plant Evolution. *Plastid Genome Evolution.* Elsevier. p. 293–  
1238 313.
- 1239 Glémin S., Scornavacca C., Dainat J., Burgarella C., Viader V., Ardisson M., Sarah G., Santoni  
1240 S., David J., Ranwez V. 2019. Pervasive hybridizations in the history of wheat relatives.  
1241 *Sci. Adv.* 5:eaav9188.
- 1242 Gonçalves D.J.P., Simpson B.B., Ortiz E.M., Shimizu G.H., Jansen R.K. 2019. Incongruence  
1243 between gene trees and species trees and phylogenetic signal variation in plastid genes.  
1244 *Mol. Phylogenet. Evol.* 138:219–232.
- 1245 Green R.E., Krause J., Briggs A.W., Maricic T., Stenzel U., Kircher M., Patterson N., Li H., Zhai  
1246 W., Fritz M.H.Y., Hansen N.F., Durand E.Y., Malaspinas A.S., Jensen J.D., Marques-  
1247 Bonet T., Alkan C., Prufer K., Meyer M., Burbano H.A., Good J.M., Schultz R., Aximu-

- 1248 Petri A., Butthof A., Hober B., Hoffner B., Siegemund M., Weihmann A., Nusbaum C.,  
1249 Lander E.S., Russ C., Novod N., Affourtit J., Egholm M., Verna C., Rudan P., Brajkovic  
1250 D., Kucan Z., Gusic I., Doronichev V.B., Golovanova L.V., Lalueza-Fox C., de la Rasilla  
1251 M., Fortea J., Rosas A., Schmitz R.W., Johnson P.L.F., Eichler E.E., Falush D., Birney  
1252 E., Mullikin J.C., Slatkin M., Nielsen R., Kelso J., Lachmann M., Reich D., Paabo S.  
1253 2010. A Draft Sequence of the Neandertal Genome. *Science*. 328:710–722.
- 1254 Haas B.J., Papanicolaou A., Yassour M., Grabherr M., Blood P.D., Bowden J., Couger M.B.,  
1255 Eccles D., Li B., Lieber M., MacManes M.D., Ott M., Orvis J., Pochet N., Strozzi F.,  
1256 Weeks N., Westerman R., William T., Dewey C.N., Henschel R., LeDuc R.D., Friedman  
1257 N., Regev A. 2013. De novo transcript sequence reconstruction from RNA-seq using the  
1258 Trinity platform for reference generation and analysis. *Nat. Protoc.* 8:1494–1512.
- 1259 Hejase H.A., Liu K.J. 2016. A scalability study of phylogenetic network inference methods using  
1260 empirical datasets and simulations involving a single reticulation. *BMC Bioinformatics*.  
1261 17:422.
- 1262 Hejase H.A., VandePol N., Bonito G.M., Liu K.J. 2018. FastNet: Fast and Accurate Statistical  
1263 Inference of Phylogenetic Networks Using Large-Scale Genomic Sequence Data. *Comp.*  
1264 *Genomics*.:242–259.
- 1265 Hernández-Ledesma P., Berendsohn W.G., Borsch T., Mering S.V., Akhiani H., Arias S.,  
1266 Castañeda-Noa I., Egli U., Eriksson R., Flores-Olvera H., Fuentes-Bazán S., Kadereit  
1267 G., Klak C., Korotkova N., Nyffeler R., Ocampo G., Ochoterena H., Oxelman B.,  
1268 Rabeler R.K., Sanchez A., Schlumpberger B.O., Uotila P. 2015. A taxonomic backbone

- 1269 for the global synthesis of species diversity in the angiosperm order Caryophyllales.  
1270 *Willdenowia*. 45:281.
- 1271 Hoang D.T., Chernomor O. 2018. UFBoot2: Improving the Ultrafast Bootstrap Approximation.  
1272 *Mol. Biol. Evol.* 35:518–522.
- 1273 Hohmann S., Kadereit J.W., Kadereit G. 2006. Understanding Mediterranean-Californian  
1274 disjunctions: molecular evidence from Chenopodiaceae-Betoideae. *TAXON*. 55:67–78.
- 1275 Holder M.T., Anderson J.A., Holloway A.K. 2001. Difficulties in Detecting Hybridization. *Syst.*  
1276 *Biol.* 50:978–982.
- 1277 Huang H., Knowles L.L. 2009. What Is the Danger of the Anomaly Zone for Empirical  
1278 Phylogenetics? *Syst. Biol.* 58:527–536.
- 1279 Huang W., Zhou G., Marchand M., Ash J.R., Morris D., Van Dooren P., Brown J.M., Gallivan  
1280 K.A., Wilgenbusch J.C. 2016. TreeScaper: Visualizing and Extracting Phylogenetic  
1281 Signal from Sets of Trees. *Mol. Biol. Evol.* 33:3314–3316.
- 1282 Hughes L.C., Ortí G., Huang Y., Sun Y., Baldwin C.C., Thompson A.W., Arcila D., Betancur-R.  
1283 R., Li C., Becker L., Bellora N., Zhao X., Li X., Wang M., Fang C., Xie B., Zhou Z.,  
1284 Huang H., Chen S., Venkatesh B., Shi Q. 2018. Comprehensive phylogeny of ray-finned  
1285 fishes (Actinopterygii) based on transcriptomic and genomic data. *Proc. Natl. Acad. Sci.*  
1286 115:6249–6254.
- 1287 Jarvis D.E., Ho Y.S., Lightfoot D.J., Schmöckel S.M., Li B., Borm T.J.A., Ohyanagi H., Mineta  
1288 K., Michell C.T., Saber N., Kharbatia N.M., Rupper R.R., Sharp A.R., Dally N.,

- 1289 Boughton B.A., Woo Y.H., Gao G., Schijlen E.G.W.M., Guo X., Momin A.A., Negrão  
1290 S., Al-Babili S., Gehring C., Roessner U., Jung C., Murphy K., Arold S.T., Gojobori T.,  
1291 Linden C.G.V.D., van Loo E.N., Jellen E.N., Maughan P.J., Tester M. 2017. The genome  
1292 of *Chenopodium quinoa*. *Nature*. 542:307–312.
- 1293 Jarvis E.D., Mirarab S., Aberer A.J., Li B., Houde P., Li C., Ho S.Y.W., Faircloth B.C., Nabholz  
1294 B., Howard J.T., Suh A., Weber C.C., da Fonseca R.R., Li J., Zhang F., Li H., Zhou L.,  
1295 Narula N., Liu L., Ganapathy G., Boussau B., Bayzid Md.S., Zavidovych V.,  
1296 Subramanian S., Gabaldón T., Capella-Gutiérrez S., Huerta-Cepas J., Rekepalli B.,  
1297 Munch K., Schierup M., Lindow B., Warren W.C., Ray D., Green R.E., Bruford M.W.,  
1298 Zhan X., Dixon A., Li S., Li N., Huang Y., Derryberry E.P., Bertelsen M.F., Sheldon  
1299 F.H., Brumfield R.T., Mello C.V., Lovell P.V., Wirthlin M., Schneider M.P.C.,  
1300 Prosdocimi F., Samaniego J.A., Velazquez A.M.V., Alfaro-Núñez A., Campos P.F.,  
1301 Petersen B., Sicheritz-Ponten T., Pas A., Bailey T., Scofield P., Bunce M., Lambert D.M.,  
1302 Zhou Q., Perelman P., Driskell A.C., Shapiro B., Xiong Z., Zeng Y., Liu S., Li Z., Liu B.,  
1303 Wu K., Xiao J., Yinqi X., Zheng Q., Zhang Y., Yang H., Wang J., Smeds L., Rheindt  
1304 F.E., Braun M., Fjeldsa J., Orlando L., Barker F.K., Jönsson K.A., Johnson W., Koepfli  
1305 K.-P., O’Brien S., Haussler D., Ryder O.A., Rahbek C., Willerslev E., Graves G.R.,  
1306 Glenn T.C., McCormack J., Burt D., Ellegren H., Alström P., Edwards S.V., Stamatakis  
1307 A., Mindell D.P., Cracraft J., Braun E.L., Warnow T., Jun W., Gilbert M.T.P., Zhang G.  
1308 2014. Whole-genome analyses resolve early branches in the tree of life of modern birds.  
1309 *Science*. 346:1320.
- 1310 Joly S., McLenachan P.A., Lockhart P.J. 2009. A Statistical Approach for Distinguishing  
1311 Hybridization and Incomplete Lineage Sorting. *Am. Nat.* 174:E54–E70.

- 1312 Kadereit G., Ackerly D., Pirie M.D. 2012. A broader model for C4 photosynthesis evolution in  
1313 plants inferred from the goosefoot family (Chenopodiaceae s.s.). Proc. R. Soc. B Biol.  
1314 Sci. 279:3304–3311.
- 1315 Kadereit G., Borsch T., Weising K., Freitag H. 2003. Phylogeny of Amaranthaceae and  
1316 Chenopodiaceae and the Evolution of C4 Photosynthesis. Int. J. Plant Sci. 164:959–986.
- 1317 Kadereit G., Hohmann S., Kadereit J.W. 2006. A synopsis of Chenopodiaceae subfam. Betoideae  
1318 and notes on the taxonomy of *Beta*. Willdenowia. 36:9–19.
- 1319 Kadereit G., Newton R.J., Vandeloock F. 2017. Evolutionary ecology of fast seed germination—  
1320 A case study in Amaranthaceae/Chenopodiaceae. Perspect. Plant Ecol. Evol. Syst. 29:1–  
1321 11.
- 1322 Kalyaanamoorthy S., Minh B.Q., Wong T.K.F., von Haeseler A., Jermini L.S. 2017.  
1323 ModelFinder: fast model selection for accurate phylogenetic estimates. Nat. Methods.  
1324 14:587–589.
- 1325 Kamneva O.K., Rosenberg N.A. 2017. Simulation-Based Evaluation of Hybridization Network  
1326 Reconstruction Methods in the Presence of Incomplete Lineage Sorting. Evol.  
1327 Bioinforma. 13:117693431769193.
- 1328 Katoh K., Standley D.M. 2013. MAFFT Multiple Sequence Alignment Software Version 7:  
1329 Improvements in Performance and Usability. Mol. Biol. Evol. 30:772–780.
- 1330 Kearse M., Moir R., Wilson A., Stones-Havas S., Cheung M., Sturrock S., Buxton S., Cooper A.,  
1331 Markowitz S., Duran C., Thierer T., Ashton B., Meintjes P., Drummond A. 2012.

- 1332 Geneious Basic: An integrated and extendable desktop software platform for the  
1333 organization and analysis of sequence data. *Bioinformatics*. 28:1647–1649.
- 1334 Knowles L.L., Huang H., Sukumaran J., Smith S.A. 2018. A matter of phylogenetic scale:  
1335 Distinguishing incomplete lineage sorting from lateral gene transfer as the cause of gene  
1336 tree discord in recent versus deep diversification histories. *Am. J. Bot.* 105:376–384.
- 1337 Kubatko L.S., Chifman J. 2019. An invariants-based method for efficient identification of hybrid  
1338 species from large-scale genomic data. *BMC Evol. Biol.* 19:112.
- 1339 Lanfear R., Calcott B., Ho S.Y.W., Guindon S. 2012. PartitionFinder: Combined Selection of  
1340 Partitioning Schemes and Substitution Models for Phylogenetic Analyses. *Mol. Biol.*  
1341 *Evol.* 29:1695–1701.
- 1342 Langmead B., Salzberg S.L. 2012. Fast gapped-read alignment with Bowtie 2. *Nat. Methods*.  
1343 9:357–359.
- 1344 Laumer C.E., Fernández R., Lemer S., Combosch D., Kocot K.M., Riesgo A., Andrade S.C.S.,  
1345 Sterrer W., Sørensen M.V., Giribet G. 2019. Revisiting metazoan phylogeny with  
1346 genomic sampling of all phyla. *Proc. R. Soc. B Biol. Sci.* 286:20190831.
- 1347 Lê S., Josse J., Husson F. 2008. FactoMineR : An R Package for Multivariate Analysis. *J. Stat.*  
1348 *Softw.* 25: 1–18.
- 1349 Lee-Yaw J.A., Grassa C.J., Joly S., Andrew R.L., Rieseberg L.H. 2019. An evaluation of  
1350 alternative explanations for widespread cytonuclear discordance in annual sunflowers  
1351 (*Helianthus*). *New Phytol.* 221:515–526.

- 1352 Li B., Lopes J.S., Foster P.G., Embley T.M., Cox C.J. 2014. Compositional Biases among  
1353 Synonymous Substitutions Cause Conflict between Gene and Protein Trees for Plastid  
1354 Origins. *Mol. Biol. Evol.* 31:1697–1709.
- 1355 Lightfoot D.J., Jarvis D.E., Ramaraj T., Lee R., Jellen E.N., Maughan P.J. 2017. Single-molecule  
1356 sequencing and Hi-C-based proximity-guided assembly of amaranth (*Amaranthus*  
1357 *hypochondriacus*) chromosomes provide insights into genome evolution. *BMC Biol.*  
1358 15:74.
- 1359 Linkem C.W., Minin V.N., Leaché A.D. 2016. Detecting the Anomaly Zone in Species Trees  
1360 and Evidence for a Misleading Signal in Higher-Level Skink Phylogeny (Squamata:  
1361 Scincidae). *Syst. Biol.* 65:465–477.
- 1362 Liu L., Yu L. 2010. Phybase: an R package for species tree analysis. *Bioinformatics.* 26:962–  
1363 963.
- 1364 Liu Y., Cox C.J., Wang W., Goffinet B. 2014. Mitochondrial Phylogenomics of Early Land  
1365 Plants: Mitigating the Effects of Saturation, Compositional Heterogeneity, and Codon-  
1366 Usage Bias. *Syst. Biol.* 63:862–878.
- 1367 Maddison W.P. 1997. Gene Trees in Species Trees. *Syst. Biol.* 46:532–536.
- 1368 Mai U., Mirarab S. 2018. TreeShrink: fast and accurate detection of outlier long branches in  
1369 collections of phylogenetic trees. *BMC Genomics.* 19:4046.

- 1370 Marcussen T., Sandve S.R., Heier L., Spannagl M., Pfeifer M., Jakobsen K.S., Wulff B.B.H.,  
1371 Steuernagel B., Mayer K.F.X., Olsen O.-A. 2014. Ancient hybridizations among the  
1372 ancestral genomes of bread wheat. *Science*. 345:1250092.
- 1373 Masson R., Kadereit G. 2013. Phylogeny of Polycnemoideae (Amaranthaceae): Implications for  
1374 biogeography, character evolution and taxonomy. *TAXON*. 62:100–111.
- 1375 Maureira-Butler I.J., Pfeil B.E., Muangprom A., Osborn T.C., Doyle J.J. 2008. The Reticulate  
1376 History of *Medicago* (Fabaceae). *Syst. Biol.* 57:466–482.
- 1377 Mclean B.S., Bell K.C., Allen J.M., Helgen K.M., Cook J.A. 2019. Impacts of Inference Method  
1378 and Data set Filtering on Phylogenomic Resolution in a Rapid Radiation of Ground  
1379 Squirrels (Xerinae: Marmotini). *Syst. Biol.* 68:298–316.
- 1380 Meyer B.S., Matschiner M., Salzburger W. 2017. Disentangling Incomplete Lineage Sorting and  
1381 Introgression to Refine Species-Tree Estimates for Lake Tanganyika Cichlid Fishes. *Syst.*  
1382 *Biol.* 66:531–550.
- 1383 Mirarab S., Bayzid M.S., Warnow T. 2016. Evaluating Summary Methods for Multilocus  
1384 Species Tree Estimation in the Presence of Incomplete Lineage Sorting. *Syst. Biol.*  
1385 65:366–380.
- 1386 Misof B., Liu S., Meusemann K., Peters R.S., Donath A., Mayer C., Frandsen P.B., Ware J.,  
1387 Flouri T., Beutel R.G., Niehuis O., Petersen M., Izquierdo-Carrasco F., Wappler T., Rust  
1388 J., Aberer A.J., Aspöck U., Aspöck H., Bartel D., Blanke A., Berger S., Böhm A.,  
1389 Buckley T.R., Calcott B., Chen J., Friedrich F., Fukui M., Fujita M., Greve C., Grobe P.,  
1390 Gu S., Huang Y., Jermiin L.S., Kawahara A.Y., Krogmann L., Kubiak M., Lanfear R.,



- 1391 Letsch H., Li Y., Li Z., Li J., Lu H., Machida R., Mashimo Y., Kapli P., McKenna D.D.,  
1392 Meng G., Nakagaki Y., Navarrete-Heredia J.L., Ott M., Ou Y., Pass G., Podsiadlowski  
1393 L., Pohl H., von Reumont B.M., Schutte K., Sekiya K., Shimizu S., Slipinski A.,  
1394 Stamatakis A., Song W., Su X., Szucsich N.U., Tan M., Tan X., Tang M., Tang J.,  
1395 Timelthaler G., Tomizuka S., Trautwein M., Tong X., Uchifune T., Walz M.G.,  
1396 Wiegmann B.M., Wilbrandt J., Wipfler B., Wong T.K.F., Wu Q., Wu G., Xie Y., Yang  
1397 S., Yang Q., Yeates D.K., Yoshizawa K., Zhang Q., Zhang R., Zhang W., Zhang Y.,  
1398 Zhao J., Zhou C., Zhou L., Ziesmann T., Zou S., Li Y., Xu X., Zhang Y., Yang H., Wang  
1399 J., Wang J., Kjer K.M., Zhou X. 2014. Phylogenomics resolves the timing and pattern of  
1400 insect evolution. *Science*. 346:763–767.
- 1401 Morales-Briones D.F., Liston A., Tank D.C. 2018a. Phylogenomic analyses reveal a deep history  
1402 of hybridization and polyploidy in the Neotropical genus *Lachemilla* (Rosaceae). *New*  
1403 *Phytol.* 218:1668–1684.
- 1404 Morales-Briones D.F., Romoleroux K., Kolář F., Tank D.C. 2018b. Phylogeny and Evolution of  
1405 the Neotropical Radiation of *Lachemilla* (Rosaceae): Uncovering a History of Reticulate  
1406 Evolution and Implications for Infrageneric Classification. *Syst. Bot.* 43:17–34.
- 1407 Moray C., Goolsby E.W., Bromham L. 2016. The Phylogenetic Association Between Salt  
1408 Tolerance and Heavy Metal Hyperaccumulation in Angiosperms. *Evol. Biol.* 43:119–  
1409 130.
- 1410 Mower J.P. 2009. The PREP suite: predictive RNA editors for plant mitochondrial genes,  
1411 chloroplast genes and user-defined alignments. *Nucleic Acids Res.* 37:W253–W259.

- 1412 Müller K., Borsch T. 2005. Phylogenetics of Amaranthaceae Based on *matK/trnK* Sequence  
1413 Data: Evidence from Parsimony, Likelihood, and Bayesian Analyses. *Ann. Mo. Bot.*  
1414 *Gard.* 92:66–102.
- 1415 Nguyen L.-T., Schmidt H.A., von Haeseler A., Minh B.Q. 2015. IQ-TREE: A Fast and Effective  
1416 Stochastic Algorithm for Estimating Maximum-Likelihood Phylogenies. *Mol. Biol. Evol.*  
1417 32:268–274.
- 1418 Osuna-Mascaró C., Rubio de Casas R., Perfectti F. 2018. Comparative assessment shows the  
1419 reliability of chloroplast genome assembly using RNA-seq. *Sci. Rep.* 8:17404.
- 1420 Pamilo P., Nei M. 1988. Relationships between Gene Trees and Species Trees. *Mol. Biol. Evol.*  
1421 5:568–583.
- 1422 Paradis E., Schliep K. 2019. ape 5.0: an environment for modern phylogenetics and evolutionary  
1423 analyses in R. *Bioinformatics.* 35:526–528.
- 1424 Patro R., Duggal G., Love M.I., Irizarry R.A., Kingsford C. 2017. Salmon provides fast and bias-  
1425 aware quantification of transcript expression. *Nat. Methods.* 14:417–419.
- 1426 Patterson N., Moorjani P., Luo Y., Mallick S., Rohland N., Zhan Y., Genschoreck T., Webster  
1427 T., Reich D. 2012. Ancient Admixture in Human History. *Genetics.* 192:1065–1093.
- 1428 Pease J.B., Brown J.W., Walker J.F., Hinchliff C.E., Smith S.A. 2018. Quartet Sampling  
1429 distinguishes lack of support from conflicting support in the green plant tree of life. *Am.*  
1430 *J. Bot.* 105:385–403.

- 1431 Pease J.B., Hahn M.W. 2015. Detection and Polarization of Introgression in a Five-Taxon  
1432 Phylogeny. *Syst. Biol.* 64:651–662.
- 1433 Peden J. 1999. Analysis of Codon Usage. PhD diss., University of Nottingham.
- 1434 Philippe H., Forterre P. 1999. The Rooting of the Universal Tree of Life Is Not Reliable. *J. Mol.*  
1435 *Evol.* 49:509–523.
- 1436 Piirainen M., Liebisch O., Kadereit G. 2017. Phylogeny, biogeography, systematics and  
1437 taxonomy of Salicornioideae (Amaranthaceae/Chenopodiaceae) – A cosmopolitan, highly  
1438 specialized hygrohalophyte lineage dating back to the Oligocene. *Taxon.* 66:109–132.
- 1439 Prasanna A.N., Gerber D., Kijpornyongpan T., Aime M.C., Doyle V.P., Nagy L.G. 2019. Model  
1440 Choice, Missing Data, and Taxon Sampling Impact Phylogenomic Inference of Deep  
1441 Basidiomycota Relationships. *sys029*, <https://doi.org/10.1093/sysbio/sys029>
- 1442 Pruitt K.D., Tatusova T., Maglott D.R. 2007. NCBI reference sequences (RefSeq): a curated  
1443 non-redundant sequence database of genomes, transcripts and proteins. *Nucleic Acids*  
1444 *Res.* 35:D61–D65.
- 1445 R Core Team. 2019. R: A Language and Environment for Statistical Computing. Vienna,  
1446 Austria: R Foundation for Statistical Computing.
- 1447 Rannala B., Yang Z. 2003. Bayes Estimation of Species Divergence Times and Ancestral  
1448 Population Sizes Using DNA Sequences From Multiple Loci. *Genetics.* 166:1645–1656.

- 1449 Ranwez V., Douzery E.J.P., Cambon C., Chantret N., Delsuc F. 2018. MACSE v2: Toolkit for  
1450 the Alignment of Coding Sequences Accounting for Frameshifts and Stop Codons. *Mol.*  
1451 *Biol. Evol.* 35:2582–2584.
- 1452 Regier J.C., Shultz J.W., Zwick A., Hussey A., Ball B., Wetzer R., Martin J.W., Cunningham  
1453 C.W. 2010. Arthropod relationships revealed by phylogenomic analysis of nuclear  
1454 protein-coding sequences. *Nature*. 463:1079–1083.
- 1455 Rieseberg L.H., Soltis D.E. 1991. Phylogenetic consequences of cytoplasmic gene flow in plants.  
1456 *Evol. Trends Plants*. 5:65–84.
- 1457 Robinson D.F., Foulds L.R. 1981. Comparison of phylogenetic trees. *Math. Biosci.* 53:131–147.
- 1458 Rosenberg N.A. 2013. Discordance of Species Trees with Their Most Likely Gene Trees: A  
1459 Unifying Principle. *Mol. Biol. Evol.* 30:2709–2713.
- 1460 Roycroft E.J., Moussalli A., Rowe K.C. 2019. Phylogenomics Uncovers Confidence and  
1461 Conflict in the Rapid Radiation of Australo-Papuan Rodents. *Syst. Biol.* syz044,  
1462 <https://doi.org/10.1093/sysbio/syz044>
- 1463 Salichos L., Stamatakis A., Rokas A. 2014. Novel Information Theory-Based Measures for  
1464 Quantifying Incongruence among Phylogenetic Trees. *Mol. Biol. Evol.* 31:1261–1271.
- 1465 Sang T., Crawford D.J., Stuessy T.F. 1995. Documentation of reticulate evolution in peonies  
1466 (*Paeonia*) using internal transcribed spacer sequences of nuclear ribosomal DNA:  
1467 implications for biogeography and concerted evolution. *Proc. Natl. Acad. Sci.* 92:6813–  
1468 6817.

- 1469 Sayyari E., Mirarab S. 2016. Fast Coalescent-Based Computation of Local Branch Support from  
1470 Quartet Frequencies. *Mol. Biol. Evol.* 33:1654–1668.
- 1471 Schliep K.P. 2011. phangorn: phylogenetic analysis in R. *Bioinformatics.* 27:592–593.
- 1472 Schliesky S., Gowik U., Weber A.P.M., Bräutigam A. 2012. RNA-Seq Assembly – Are We  
1473 There Yet? *Front. Plant Sci.* 3.
- 1474 Schwarz G. 1978. Estimating the Dimension of a Model. *Ann. Stat.* 6:461–464.
- 1475 Sharp P.M., Li W.-H. 1986. An evolutionary perspective on synonymous codon usage in  
1476 unicellular organisms. *J. Mol. Evol.* 24:28–38.
- 1477 Shi C., Wang S., Xia E.-H., Jiang J.-J., Zeng F.-C., Gao L.-Z. 2016. Full transcription of the  
1478 chloroplast genome in photosynthetic eukaryotes. *Sci. Rep.* 6:30135.
- 1479 Shimodaira H. 2002. An Approximately Unbiased Test of Phylogenetic Tree Selection. *Syst.*  
1480 *Biol.* 51:492–508.
- 1481 Shimodaira H., Hasegawa M. 2001. CONSEL: for assessing the confidence of phylogenetic tree  
1482 selection. *Bioinformatics.* 17:1246–1247.
- 1483 Smith D.R. 2013. RNA-Seq data: a goldmine for organelle research. *Brief. Funct. Genomics.*  
1484 12:454–456.
- 1485 Smith S.A., Moore M.J., Brown J.W., Yang Y. 2015. Analysis of phylogenomic datasets reveals  
1486 conflict, concordance, and gene duplications with examples from animals and plants.  
1487 *BMC Evol. Biol.* 15:745.

- 1488 Smith S.A., O'Meara B.C. 2012. treePL: divergence time estimation using penalized likelihood  
1489 for large phylogenies. *Bioinformatics*. 28:2689–2690.
- 1490 Smith-Unna R., Boursnell C., Patro R., Hibberd J.M., Kelly S. 2016. TransRate: reference-free  
1491 quality assessment of de novo transcriptome assemblies. *Genome Res*. 26:1134–1144.
- 1492 Solís-Lemus C., Ané C. 2016a. Inferring Phylogenetic Networks with Maximum  
1493 Pseudolikelihood under Incomplete Lineage Sorting. *PLOS Genet*. 12:e1005896.
- 1494 Soltis D.E., Kuzoff R.K. 1995. Discordance between nuclear and chloroplast phylogenies in the  
1495 *Heuchera* group (Saxifragaceae). *Evolution*. 49:727–742.
- 1496 Song L., Florea L. 2015. Rcorrector: efficient and accurate error correction for Illumina RNA-  
1497 seq reads. *GigaScience*. 4:48.
- 1498 Srivastava S.K. 1969. Assorted angiosperm pollen from the Edmonton Formation  
1499 (Maestrichtian), Alberta, Canada. *Can. J. Bot*. 47:975–989.
- 1500 Stamatakis A. 2014. RAxML version 8 - a tool for phylogenetic analysis and post-analysis of  
1501 large phylogenies. *Bioinformatics*. 30:1312–1313.
- 1502 Sugiura N. 1978. Further analysts of the data by akaike' s information criterion and the finite  
1503 corrections. *Commun. Stat. - Theory Methods*. 7:13–26.
- 1504 Swofford D. 2002. PAUP\*. Phylogenetic analysis using parsimony (\*and other methods) version  
1505 4. Sunderland MA Sinauer Assoc.
- 1506 Than C., Ruths D., Nakhleh L. 2008. PhyloNet: a software package for analyzing and  
1507 reconstructing reticulate evolutionary relationships. *BMC Bioinformatics*. 9:322–16.

- 1508 The Angiosperm Phylogeny Group, Chase M.W., Christenhusz M.J.M., Fay M.F., Byng J.W.,  
1509 Judd W.S., Soltis D.E., Mabberley D.J., Sennikov A.N., Soltis P.S., Stevens P.F. 2016.  
1510 An update of the Angiosperm Phylogeny Group classification for the orders and families  
1511 of flowering plants: APG IV. *Bot. J. Linn. Soc.* 181:1–20.
- 1512 Varga T., Krizsán K., Földi C., Dima B., Sánchez-García M., Sánchez-Ramírez S., Szöllősi G.J.,  
1513 Szarkándi J.G., Papp V., Albert L., Andreopoulos W., Angelini C., Antonín V., Barry  
1514 K.W., Bougher N.L., Buchanan P., Buyck B., Bense V., Catcheside P., Chovatia M.,  
1515 Cooper J., Dämon W., Desjardin D., Finy P., Geml J., Haridas S., Hughes K., Justo A.,  
1516 Karasiński D., Kautmanova I., Kiss B., Kocsubé S., Kotiranta H., LaButti K.M., Lechner  
1517 B.E., Liimatainen K., Lipzen A., Lukács Z., Mihaltcheva S., Morgado L.N., Niskanen T.,  
1518 Noordeloos M.E., Ohm R.A., Ortiz-Santana B., Ovrebo C., Rácz N., Riley R., Savchenko  
1519 A., Shiryayev A., Soop K., Spirin V., Szebenyi C., Tomšovský M., Tulloss R.E., Uehling  
1520 J., Grigoriev I.V., Vágvölgyi C., Papp T., Martin F.M., Miettinen O., Hibbett D.S., Nagy  
1521 L.G. 2019. Megaphylogeny resolves global patterns of mushroom evolution. *Nat. Ecol.*  
1522 *Evol.* 3:668–678.
- 1523 Vargas O.M., Ortiz E.M., Simpson B.B. 2017. Conflicting phylogenomic signals reveal a pattern  
1524 of reticulate evolution in a recent high-Andean diversification (*Asteraceae*: *Astereae*:  
1525 *Diplostephium*). *New Phytol.* 214:1736–1750.
- 1526 Walker J.F., Walker-Hale N., Vargas O.M., Larson D.A., Stull G.W. 2019. Characterizing gene  
1527 tree conflict in plastome-inferred phylogenies. *PeerJ.* 7:e7747.

- 1528 Walker J.F., Yang Y., Feng T., Timoneda A., Mikenas J., Hutchison V., Edwards C., Wang N.,  
1529 Ahluwalia S., Olivieri J., Walker-Hale N., Majure L.C., Puente R., Kadereit G.,  
1530 Lauterbach M., Eggli U., Flores-Olvera H., Ochoterena H., Brockington S.F., Moore  
1531 M.J., Smith S.A. 2018. From cacti to carnivores: Improved phylotranscriptomic sampling  
1532 and hierarchical homology inference provide further insight into the evolution of  
1533 Caryophyllales. *Am. J. Bot.* 105:446–462.
- 1534 Wang Y., Tang H., DeBarry J.D., Tan X., Li J., Wang X., Lee T. -h., Jin H., Marler B., Guo H.,  
1535 Kissinger J.C., Paterson A.H. 2012. MCScanX: a toolkit for detection and evolutionary  
1536 analysis of gene synteny and collinearity. *Nucleic Acids Res.* 40:e49–e49.
- 1537 Wen D., Nakhleh L. 2018. Coestimating Reticulate Phylogenies and Gene Trees from Multilocus  
1538 Sequence Data. *Syst. Biol.* 67:439–457.
- 1539 Wen D., Yu Y., Hahn M.W., Nakhleh L. 2016a. Reticulate evolutionary history and extensive  
1540 introgression in mosquito species revealed by phylogenetic network analysis. *Mol. Ecol.*  
1541 25:2361–2372.
- 1542 Wen D., Yu Y., Nakhleh L. 2016b. Bayesian Inference of Reticulate Phylogenies under the  
1543 Multispecies Network Coalescent. *PLOS Genet.* 12:e1006006.
- 1544 Wickett N.J., Mirarab S., Nguyen N., Warnow T., Carpenter E., Matasci N., Ayyampalayam S.,  
1545 Barker M.S., Burleigh J.G., Gitzendanner M.A., Ruhfel B.R., Wafula E., Der J.P.,  
1546 Graham S.W., Mathews S., Melkonian M., Soltis D.E., Soltis P.S., Miles N.W., Rothfels  
1547 C.J., Pokorny L., Shaw A.J., DeGironimo L., Stevenson D.W., Surek B., Villarreal J.C.,  
1548 Roure B., Philippe H., dePamphilis C.W., Chen T., Deyholos M.K., Baucom R.S.,



- 1549 Kutchan T.M., Augustin M.M., Wang J., Zhang Y., Tian Z., Yan Z., Wu X., Sun X.,  
1550 Wong G.K.-S., Leebens-Mack J. 2014. Phylotranscriptomic analysis of the origin and  
1551 early diversification of land plants. *Proc. Natl. Acad. Sci.* 111:E4859–E4868.
- 1552 Widhelm T.J., Grewe F., Huang J.-P., Mercado-Díaz J.A., Goffinet B., Lücking R., Moncada B.,  
1553 Mason-Gamer R., Lumbsch H.T. 2019. Multiple historical processes obscure  
1554 phylogenetic relationships in a taxonomically difficult group (Lobariaceae, Ascomycota).  
1555 *Sci. Rep.* 9:8968.
- 1556 Xu B., Yang Z. 2016. Challenges in Species Tree Estimation Under the Multispecies Coalescent  
1557 Model. *Genetics.* 204:1353–1368.
- 1558 Xu C., Jiao C., Sun H., Cai X., Wang X., Ge C., Zheng Y., Liu W., Sun X., Xu Y., Deng J.,  
1559 Zhang Z., Huang S., Dai S., Mou B., Wang Q., Fei Z., Wang Q. 2017. Draft genome of  
1560 spinach and transcriptome diversity of 120 *Spinacia* accessions. *Nat. Commun.* 8:15275.
- 1561 Yang Y., Moore M.J., Brockington S.F., Timoneda A., Feng T., Marx H.E., Walker J.F., Smith  
1562 S.A. 2017. An Efficient Field and Laboratory Workflow for Plant Phylotranscriptomic  
1563 Projects. *Appl. Plant Sci.* 5:1600128.
- 1564 Yang Y., Smith S.A. 2013. Optimizing de novo assembly of short-read RNA-seq data for  
1565 phylogenomics. *BMC Genomics.* 14:328.
- 1566 Yang Y., Smith S.A. 2014. Orthology Inference in Nonmodel Organisms Using Transcriptomes  
1567 and Low-Coverage Genomes: Improving Accuracy and Matrix Occupancy for  
1568 Phylogenomics. *Mol. Biol. Evol.* 31:3081–3092.

- 1569 Yao G., Jin J.-J., Li H.-T., Yang J.-B., Mandala V.S., Croley M., Mostow R., Douglas N.A.,  
1570 Chase M.W., Christenhusz M.J.M., Soltis D.E., Soltis P.S., Smith S.A., Brockington S.F.,  
1571 Moore M.J., Yi T.-S., Li D.-Z. 2019. Plastid phylogenomic insights into the evolution of  
1572 Caryophyllales. *Mol. Phylogenet. Evol.* 134:74–86.
- 1573 Yu Y., Degnan J.H., Nakhleh L. 2012. The Probability of a Gene Tree Topology within a  
1574 Phylogenetic Network with Applications to Hybridization Detection. *PLoS Genet.*  
1575 8:e1002660–10.
- 1576 Yu Y., Dong J., Liu K.J., Nakhleh L. 2014. Maximum likelihood inference of reticulate  
1577 evolutionary histories. *Proc. Natl. Acad. Sci.* 111:16448–16453.
- 1578 Yu Y., Nakhleh L. 2015. A maximum pseudo-likelihood approach for phylogenetic networks.  
1579 *BMC Genomics.* 16:S10.
- 1580 Zhang C., Ogilvie H.A., Drummond A.J., Stadler T. 2018a. Bayesian Inference of Species  
1581 Networks from Multilocus Sequence Data. *Mol. Biol. Evol.* 35:504–517.
- 1582 Zhang C., Rabiee M., Sayyari E., Mirarab S. 2018b. ASTRAL-III: polynomial time species tree  
1583 reconstruction from partially resolved gene trees. *BMC Bioinformatics.* 19:523.
- 1584 Zhao T., Schranz M.E. 2019. Network-based microsynteny analysis identifies major differences  
1585 and genomic outliers in mammalian and angiosperm genomes. *Proc. Natl. Acad. Sci.*  
1586 116:2165–2174.
- 1587 Zheng Y., Janke A. 2018. Gene flow analysis method, the D-statistic, is robust in a wide  
1588 parameter space. *BMC Bioinformatics.* 19:10.

- 1589 Zhu J., Liu X., Ogilvie H.A., Nakhleh L.K. 2019. A divide-and-conquer method for scalable  
1590 phylogenetic network inference from multilocus data. *Bioinformatics*. 35:i370–i378.
- 1591 Zhu J., Wen D., Yu Y., Meudt H.M., Nakhleh L. 2018. Bayesian inference of phylogenetic  
1592 networks from bi-allelic genetic markers. *PLOS Comput. Biol.* 14:e1005932.
- 1593 Zwick A., Regier J.C., Zwickl D.J. 2012. Resolving Discrepancy between Nucleotides and  
1594 Amino Acids in Deep-Level Arthropod Phylogenomics: Differentiating Serine Codons in  
1595 21-Amino-Acid Models. *PLoS ONE*. 7:e47450.
