1 **Disentangling Sources of Gene Tree Discordance in Phylogenomic Datasets: Testing**

2 **Ancient Hybridizations in Amaranthaceae s.l.**

3

4 Diego F. Morales-Briones<sup>1\*</sup>, Gudrun Kadereit<sup>2</sup>, Delphine T. Tefarikis<sup>2</sup>, Michael J. Moore<sup>3</sup>,

5 Stephen A. Smith<sup>4</sup>, Samuel F. Brockington<sup>5</sup>, Alfonso Timoneda<sup>5</sup>, Won C. Yim<sup>6</sup>, John C.

6 Cushman<sup>6</sup>, Ya Yang<sup>1\*</sup>

7

8 <sup>1</sup>Department of Plant and Microbial Biology, University of Minnesota-Twin Cities, 1445

9 Gortner Avenue, St. Paul, MN 55108, USA

10 <sup>2</sup>Institut für Molekulare Physiologie, Johannes Gutenberg-Universität Mainz, D-55099, Mainz,

11 Germany

12 <sup>3</sup>Department of Biology, Oberlin College, Science Center K111, 119 Woodland Street, Oberlin,

13 OH 44074-1097, USA

14 <sup>4</sup>Department of Ecology & Evolutionary Biology, University of Michigan, 830 North University

15 Avenue, Ann Arbor, MI 48109-1048, USA

16 <sup>5</sup>Department of Plant Sciences, University of Cambridge, Tennis Court Road, Cambridge, CB2

17 3EA, United Kingdom

18 <sup>6</sup>Department of Biochemistry and Molecular Biology, University of Nevada, Reno, NV, 89577,

19 USA

20

21 \*Correspondence to be sent to: Diego F. Morales-Briones and Ya Yang. Department of Plant and

22 Microbial Biology, University of Minnesota, 1445 Gortner Avenue, St. Paul, MN 55108, USA,

23 Telephone: +1 612-625-6292 (YY) Email: [dfmoralesb@gmail.com](mailto:dfmoralesb@gmail.com); [yangya@umn.edu](mailto:yangya@umn.edu)

24 **Abstract.** — Gene tree discordance in large genomic datasets can be caused by evolutionary  
25 processes such as incomplete lineage sorting and hybridization, as well as model violation, and  
26 errors in data processing, orthology inference, and gene tree estimation. Species tree methods  
27 that identify and accommodate all sources of conflict are not available, but a combination of  
28 multiple approaches can help tease apart alternative sources of conflict. Here, using a  
29 phylotranscriptomic analysis in combination with reference genomes, we test a hypothesis of  
30 ancient hybridization within the plant family Amaranthaceae s.l. that was previously supported  
31 by morphological, ecological, and Sanger-based molecular data. The dataset included seven  
32 genomes and 88 transcriptomes, 17 generated for this study. We examined gene-tree discordance  
33 using coalescent-based species trees and network inference, gene tree discordance analyses, site  
34 pattern tests of introgression, topology tests, synteny analyses, and simulations. We found that a  
35 combination of processes might have acted simultaneously and/or cumulatively to generate the  
36 high levels of gene tree discordance in the backbone of Amaranthaceae s.l. Furthermore,  
37 uninformative genes and model misspecification also contributed to discordance. No single  
38 source or evolutionary process can account for the strong signal of gene tree discordance,  
39 suggesting that the backbone of Amaranthaceae s.l. might be a product of an ancient and rapid  
40 lineage diversification, and remains —and probably will remain— unresolved. This work  
41 highlights the potential problems of identifiability associated with the sources of gene tree  
42 discordance including, in particular, phylogenetic network methods. Our results also demonstrate  
43 the importance of thoroughly testing for multiple sources of conflict in phylogenomic analyses,  
44 especially in the context of ancient, rapid radiations. We provide several recommendations for  
45 exploring conflicting signals in such situations.

46 **Keywords:** Amaranthaceae; gene tree discordance; hybridization; incomplete lineage sorting;

47 phylogenomics; transcriptomics; species tree; species network.

48

49

50

51

52

53

54

55

56

57

58

59

60

61

62

63 The exploration of gene tree discordance has become common in the phylogenetic era (Salichos  
64 et al. 2014; Smith et al. 2015; Huang et al. 2016; Pease et al. 2018) and is essential for  
65 understanding the underlying processes that shape the Tree of Life. Discordance among gene  
66 trees can be the product of multiple sources. These include errors and noise in data assembly and  
67 filtering, hidden paralogy, incomplete lineage sorting (ILS), gene duplication/loss (Pamilo and  
68 Nei 1988; Doyle 1992; Maddison 1997; Galtier and Daubin 2008), random noise from  
69 uninformative genes, as well as misspecified model parameters of molecular evolution such as  
70 substitutional saturation, codon usage bias, or compositional heterogeneity (Foster 2004; Cooper  
71 2014; Cox et al. 2014; Liu et al. 2014). Among these potential sources of gene tree discordance,  
72 ILS is the most studied in the systematics literature (Edwards 2009), and several phylogenetic  
73 inference methods have been developed to accommodate ILS as the source of discordance  
74 (reviewed in Edwards et al. 2016; Mirarab et al. 2016; Xu and Yang 2016). More recently,  
75 methods that account for additional processes such as hybridization or introgression have gained  
76 attention. These include methods that estimate phylogenetic networks while accounting for ILS  
77 and hybridization simultaneously (e.g., Solís-Lemus and Ané 2016; Wen et al. 2018), and  
78 methods that detect introgression based on site patterns or phylogenetic invariants (e.g., Green et  
79 al. 2010; Durand et al. 2011; Kubatko and Chifman 2019). Frequently, multiple of these sources  
80 of gene tree discordance can contribute to gene tree heterogeneity (Holder et al. 2001; Buckley et  
81 al. 2006; Meyer et al. 2017; Knowles et al. 2018). However, at present, no method can estimate  
82 species trees from phylogenomic data while modeling multiple sources of conflict and molecular  
83 substitution simultaneously. To overcome these limitations, the use of multiple phylogenetic  
84 tools and data partitioning schemes in phylogenomic datasets is essential to disentangle sources  
85 of gene tree heterogeneity and resolve recalcitrant relationships at deep and shallow nodes of the

86 Tree of Life (e.g., Alda et al. 2019; Roycroft et al. 2019; Widhelm et al. 2019; Prasanna et al.  
87 2020).

88 In this study, we explore multiple sources of gene tree conflict to test controversial  
89 hypotheses of ancient hybridization among subfamilies in the plant family Amaranthaceae s.l.  
90 Amaranthaceae s.l. includes the previously segregated family Chenopodiaceae (Hernández-  
91 Ledesma et al. 2015; The Angiosperm Phylogeny Group 2016). With ca. 2050 to 2500 species in  
92 181 genera and a worldwide distribution (Hernández-Ledesma et al. 2015), Amaranthaceae s.l. is  
93 iconic for the repeated evolution of complex traits representing adaptations to extreme  
94 environments such as C<sub>4</sub> photosynthesis in hot and often dry environments (e.g., Kadereit et al.  
95 2012; Bena et al. 2017), various modes of extreme salt tolerance (e.g., Flowers and Colmer 2015;  
96 Piirainen et al. 2017) that in several species are coupled with heavy metal tolerance (Moray et al.  
97 2016), and very fast seed germination and production of multiple diaspore types on one  
98 individual (Kadereit et al. 2017). Several important crops are members of Amaranthaceae s.l.,  
99 such as the pseudocereals quinoa and amaranth, sugar beet, spinach, glassworts, and *Salsola*  
100 *soda*. Many species of the family are also important fodder plants in arid regions and several are  
101 currently being investigated for their soil ameliorating and desalinating effects. Due to their  
102 economic importance, reference genomes are available for *Beta vulgaris* (sugar beet, subfamily  
103 Betoideae; Dohm et al. 2014), *Chenopodium quinoa* (quinoa, Chenopodioideae; Jarvis et al.  
104 2017), *Spinacia oleracea* (spinach; Chenopodioideae; Xu et al. 2017) and *Amaranthus*  
105 *hypochondriacus* (amaranth; Amaranthoideae; Lightfoot et al. 2017), representing three of the 13  
106 currently recognized subfamilies of Amaranthaceae s.l. (sensu Kadereit et al. 2003; Kadereit et  
107 al. 2017).

108           Within the core Caryophyllales the previously segregated families Amaranthaceae s.s.  
109   and Chenopodiaceae have always been regarded as closely related, and their separate family  
110   status has long been the subject of phylogenetic and taxonomic debate (Kadereit et al. 2003;  
111   Masson and Kadereit 2013; Hernández-Ledesma et al. 2015; Walker et al. 2018; Fig. 1). Their  
112   close affinity is supported by a number of shared morphological, anatomical and phytochemical  
113   synapomorphies, and has been substantiated by molecular phylogenetic studies (discussed in  
114   Kadereit et al. 2003). Amaranthaceae s.s. has a predominantly tropical and subtropical  
115   distribution with the highest diversity found in the Neotropics, eastern and southern Africa and  
116   Australia (Müller and Borsch 2005), while Chenopodiaceae predominantly occurs in temperate  
117   regions and semi-arid or arid environments of subtropical regions (Kadereit et al. 2003). The key  
118   problem has always been the species-poor and heterogeneous subfamilies Polycnemoideae and  
119   Betoideae, neither of which fit easily within Chenopodiaceae or Amaranthaceae s.s. (cf. Table 5  
120   in Kadereit et al. 2003). Polycnemoideae is similar in ecology and distribution to  
121   Chenopodiaceae but shares important floral traits such as petaloid tepals, filament tubes and 2-  
122   locular anthers with Amaranthaceae s.s. Morphologically, Betoideae fits into either  
123   Chenopodiaceae or Amaranthaceae s.s. but has a unique fruit type—a capsule that opens with a  
124   circumscissile lid (Kadereit et al. 2006). Both Betoideae and Polycnemoideae possess only a few  
125   species each and each has a strongly disjunct distribution patterns across three continents.  
126   Furthermore, the genera of both subfamilies display a number of morphologically dissociating  
127   features. Both intercontinental disjunctions of species-poor genera and unique morphological  
128   traits led to the hypothesis that Betoideae and Polycnemoideae might have originated from  
129   hybridization events among early-branching lineages in Amaranthaceae s.l. (Hohmann et al.  
130   2006; Masson and Kadereit 2013). To test this hypothesis, a phylotranscriptomic approach is

131 particularly compelling as it not only provides thousands of low-copy nuclear genes for  
132 dissecting sources of phylogenetic discordance, but also enables future studies associating gene  
133 tree topology with gene function and habitat adaptation.

134         Previous molecular phylogenetic analyses struggled to resolve the relationships among  
135 Betoideae, Polycnemoideae and the rest of the Amaranthaceae s.l. (Fig. 1). The first  
136 phylogenomic study of Amaranthaceae s.l. using nuclear loci (Walker et al. 2018; Fig. 1e)  
137 revealed that gene tree discordance mainly occurred at deep nodes of the phylogeny involving  
138 Betoideae. Polycnemoideae was sister to Chenopodiaceae, albeit supported by only 17% of gene  
139 trees, which contradicted previous analyses based on plastid data (Fig. 1, a–d). However, only a  
140 single species of Betoideae (the cultivated beet and its wild relative) was sampled in Walker et  
141 al. (2018) and sources of conflicting signals among gene trees remained unexplored.

142         In this study, we used a large genomic dataset to examine sources of gene tree  
143 discordance in Amaranthaceae s.l. Specifically, we tested whether Polycnemoideae and  
144 Betoideae result from independent hybridizations between Amaranthaceae s.s. and  
145 Chenopodioideae by distinguishing the signal of hybridization from gene tree discordance  
146 produced by ILS, uninformative gene trees, hidden paralogy, misspecifications of model of  
147 molecular evolution, and hard polytomy. We show that phylogenetic networks may not be  
148 identifiable, even with large and well-sampled genomic datasets.

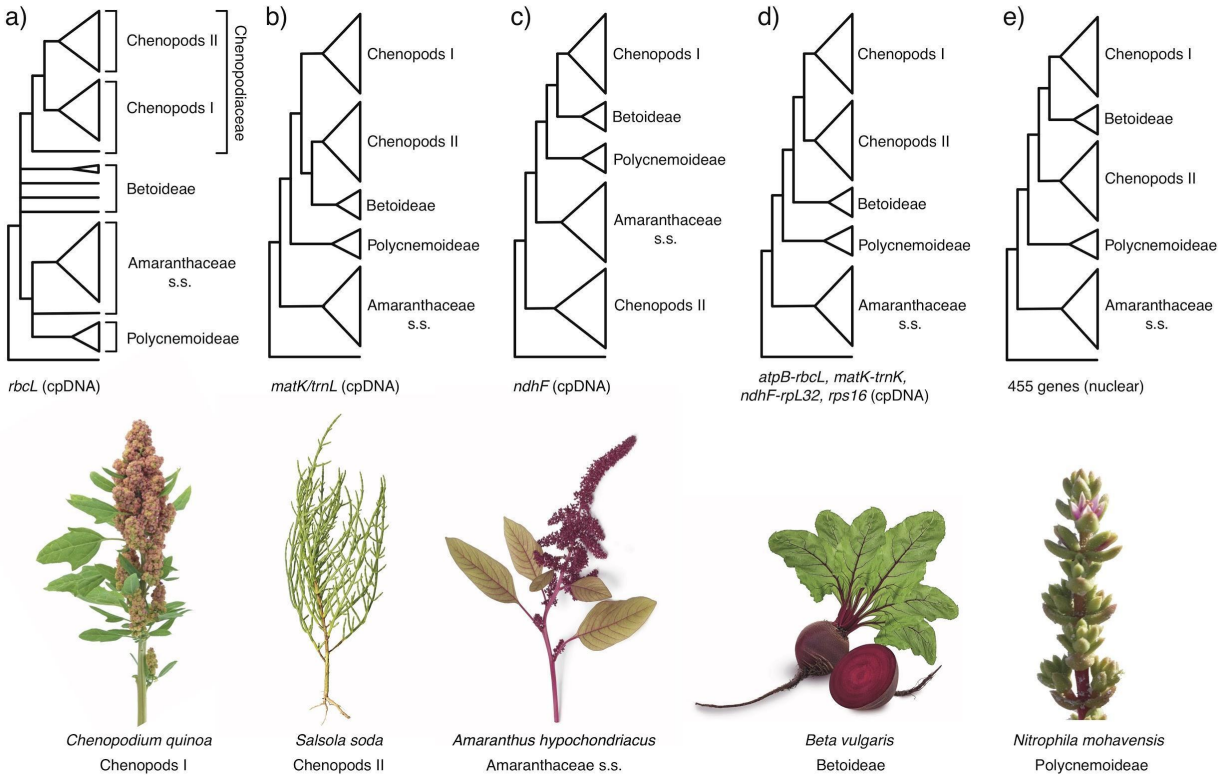

149

150 **FIGURE 1.** Phylogenetic hypothesis of Amaranthaceae s.l. from previous studies. a) Kadereit et  
 151 al. (2003) using the plastid (cpDNA) *rbcL* coding region. b) Müller and Borsch (2005); using the  
 152 cpDNA *matK* coding region and partial *trnL* intron. c) Hohmann et al. (2006) using the cpDNA  
 153 *ndhF* coding region. d) Kadereit et al. (2017) using the cpDNA *atpB-rbcL* spacer, *matK* with  
 154 *trnL* intron, *ndhF-rpL32* spacer, and *rps16* intron e) Walker et al. (2018) using 455 nuclear genes  
 155 from transcriptome data. Major clades of Amaranthaceae s.l. named following the results of this  
 156 study. Image credits: *Amaranthus hypochondriacus* by Picture Partners, *Beta vulgaris* by Olha  
 157 Huchek, *Chenopodium quinoa* by Diana Mower, *Nitrophila mohavensis* by James M. André, and  
 158 *Salsola soda* by Homeydesign.

159

160

161

## MATERIALS AND METHODS

162

An overview of all dataset and phylogenetic analyses can be found in Figure S1.

163



164 *Taxon sampling, transcriptome sequencing*

165 We sampled 92 ingroup species (88 transcriptomes and four genomes) representing 53 genera  
166 (out of ca. 181) of all 13 currently recognized subfamilies and 16 out of 17 tribes of  
167 Amaranthaceae s.l. (sensu [Kadereit et al. 2003; Kadereit et al. 2017]). In addition, 13 outgroups  
168 across the Caryophyllales were included (ten transcriptomes and three genomes; Table S1). We  
169 generated 17 new transcriptomes for this study on an Illumina HiSeq2500 platform (Table S2).  
170 Library preparation was carried out using either poly-A enrichment or ribosomal RNA depletion.  
171 See Supplemental Methods for details on tissue collection, RNA isolation, library preparation,  
172 and quality control.

173

174 *Transcriptome data processing, assembly, homology and orthology inference*

175

176 Read processing, assembly, translation, and homology and orthology inference followed the  
177 ‘phylogenomic dataset construction’ pipeline (Yang and Smith 2014) with multiple updates. We  
178 briefly describe our procedure below, with details in the Supplemental Methods and updated  
179 scripts in [https://bitbucket.org/yanglab/phylogenomic\\_dataset\\_construction/](https://bitbucket.org/yanglab/phylogenomic_dataset_construction/)

180 We processed raw reads for all 88 transcriptome datasets (except *Bienertia sinuspersici*)  
181 used in this study (Table S1). Reads were corrected for errors, trimmed for sequencing adapters  
182 and low-quality bases, and filtered for organellar reads. *De novo* assembly of processed nuclear  
183 reads was carried out with Trinity v 2.5.1 (Grabherr et al. 2011) with default settings, but without  
184 *in silico* normalization. Low quality and chimeric transcripts were removed. Filtered transcripts  
185 were clustered into putative genes with Corset v 1.07 (Davidson and Oshlack 2014) and only the  
186 longest transcript of each putative gene was retained (Chen et al. 2019). Lastly, transcripts were

187 translated, and identical coding sequences (CDS) were removed. Homology inference was  
188 carried out on CDS using reciprocal BLASTN, followed by orthology inference using the  
189 ‘monophyletic outgroup’ approach (Yang and Smith 2014), keeping only ortholog groups with at  
190 least 25 ingroup taxa.

191

#### 192 *Assessment of recombination*

193 Coalescent species tree methods assume that there is free recombination between loci and no  
194 recombination within loci. To determine the presence of recombination in our dataset, we used  
195 the pairwise homoplasy index test  $\Phi$  for recombination, as implemented in PhiPack (Bruen et al.  
196 2006). We tested recombination on the final set of ortholog alignments (with a minimum of 25  
197 taxa) with the default sliding window size of 100 bp. Alignments that showed a strong signal of  
198 recombination with  $p \leq 0.05$  were removed from all subsequent phylogenetic analyses.

199

#### 200 *Nuclear phylogenetic analysis*

201 We used both concatenation and coalescent-based methods to reconstruct the phylogeny of  
202 Amaranthaceae s.l. Sequences from final orthologs were aligned using MAFFT v 7.307 (Katoh  
203 and Standley 2013) with settings ‘—genafpair --maxiterate 1000’. Columns with more than 70%  
204 missing data were trimmed with Phyx (Brown et al. 2017), and alignments with at least 1,000  
205 characters and 99 out of 105 taxa were retained. We first estimated a maximum likelihood (ML)  
206 tree of the concatenated matrix with RAxML v 8.2.11 (Stamatakis 2014) using a partition-by-  
207 gene scheme with GTRCAT model for each partition and clade support assessed with 200 rapid  
208 bootstrap (BS) replicates. To estimate a coalescent-based species tree, first we inferred individual  
209 ML gene trees using RAxML with a GTRCAT model and 200 BS replicates to assess clade

210 support. Gene trees were then used to infer a species tree with ASTRAL-III v5.6.3 (Zhang et al.  
211 2018) using local posterior probabilities (LPP; Sayyari and Mirarab 2016) to assess clade  
212 support.

213

214 *Detecting and visualizing nuclear gene tree discordance*

215 To explore discordance among gene trees, we first calculated the internode certainty all (ICA)  
216 value to quantify the degree of conflict on each node of a target tree (i.e., species tree) given  
217 individual gene trees (Salichos et al. 2014). In addition, we calculated the number of conflicting  
218 and concordant bipartitions on each node of the species trees. Both the ICA scores and  
219 conflicting/concordant bipartitions were calculated with Phyparts (Smith et al. 2015), mapping  
220 against the inferred ASTRAL species trees, using individual gene trees with BS support of at  
221 least 50% for the corresponding node. Additionally, in order to distinguish strong conflict from  
222 weakly supported branches, we carried out Quartet Sampling (QS; Pease et al. 2018) with 100  
223 replicates. Quartet Sampling subsamples quartets from the input tree and alignment and assesses  
224 the confidence, consistency, and informativeness of each internal branch by the relative  
225 frequency of the three possible quartet topologies (Pease et al. 2018).

226 To further visualize conflict, we built a cloudogram using DensiTree v2.2.6 (Bouckaert  
227 and Heled 2014). As DensiTree cannot accommodate missing taxa among gene trees, we  
228 reduced the final ortholog alignments to include 41 species (38 ingroup and 3 outgroups) in order  
229 to include as many orthologs as possible while representing all main clades of Amaranthaceae  
230 s.l. (see results). Individual gene trees were inferred as previously described. Trees were time-  
231 calibrated with TreePL v1.0 (Smith and O'Meara 2012) by fixing the crown age of  
232 Amaranthaceae s.l. to 66–72.1 based on a pollen record of *Polyporina cribraria* from the late

233 Cretaceous (Maastrichtian; Srivastava 1969), and the root for the reduced 41-species dataset  
234 (most common recent ancestor of Achatocarpaceae and Aizoaceae) was set to 95 Ma based on  
235 the time-calibrated plastid phylogeny of Caryophyllales from Yao et al. (2019).

236

### 237 *Plastid assembly and phylogenetic analysis*

238 Although DNase treatment was carried out to remove genomic DNA, due to their high copy  
239 number, plastid sequences are often carried over in RNA-Seq libraries. In addition, as young leaf  
240 tissue was used for RNA-Seq, the presence of RNA from plastid genes is expected to be  
241 represented. To investigate phylogenetic signal from plastid sequences, *de novo* assemblies were  
242 carried out with the Fast-Plast v.1.2.6 pipeline (<https://github.com/mrmckain/Fast-Plast>) using  
243 the filtered organelle reads. Contigs produced by Spades v 3.9.0 (Bankevich et al. 2012) were  
244 mapped to the closest available reference plastomes (Table S3), one copy of the Inverted Repeat  
245 was removed, and the remaining contigs manually edited in Geneious v.11.1.5 (Kearse et al.  
246 2012) to produce the final oriented contigs.

247 Contigs were aligned with MAFFT with the setting ‘--auto’. Two samples (*Dysphania*  
248 *schraderiana* and *Spinacia turkestanica*) were removed due to low sequence occupancy. Using  
249 the annotations of the reference genomes (Table S3), the coding regions of 78 genes were  
250 extracted and each gene alignment was visually inspected in Geneious to check for potential  
251 misassemblies. From each gene alignment, taxa with short sequences (i.e., < 50% of the aligned  
252 length) were removed and the remaining sequences realigned with MAFFT. The genes *rpl32* and  
253 *ycf2* were excluded from downstream analyses due to low taxon occupancy (Table S4). For each  
254 individual gene we performed extended model selection (Kalyaanamoorthy et al. 2017) followed  
255 by ML gene tree inference and 1,000 ultrafast bootstrap replicates for branch support (Hoang and

256 Chernomor 2018) in IQ-TREE v.1.6.1 (Nguyen et al. 2015). For the concatenated matrix we  
257 searched for the best partition scheme (Lanfear et al. 2012) followed by ML gene tree inference  
258 and 1,000 ultrafast bootstrap replicates for branch support in IQ-Tree. Additionally, we evaluated  
259 branch support with QS using 1,000 replicates and gene tree discordance with PhyParts. Lastly,  
260 to identify the origin of the plastid reads (i.e., genomic or RNA), we predicted RNA editing from  
261 CDS alignments using PREP (Mower 2009) with the alignment mode (PREP-aln), and a cutoff  
262 value of 0.8.

263

264 *Species network analysis using a reduced 11-taxon dataset*

265 We inferred species networks that model ILS and gene flow using a maximum pseudo-likelihood  
266 approach (Yu and Nakhleh 2015). Species network searches were carried out with PhyloNet  
267 v.3.6.9 (Than et al. 2008) with the command ‘InferNetwork\_MPL’ and using the individual gene  
268 trees as input. Due to computational restrictions, and given our main focus to identify potential  
269 reticulating events among major clades of Amaranthaceae s.l., we reduced our taxon sampling to  
270 one outgroup and ten ingroup taxa to include two representative species from each of the five  
271 well-supported major lineages in Amaranthaceae s.l. (see results). We filtered the final 105-taxon  
272 ortholog set to include genes that have all 11 taxa [referred herein as 11-taxon(net) dataset].  
273 After alignment and trimming we kept genes with a minimum of 1,000 aligned base pairs and  
274 individual ML gene trees were inferred using RAxML with a GTRGAMMA model and 200  
275 bootstrap replicates. We carried out five network searches by allowing one to five reticulation  
276 events and ten runs for each search. To estimate the optimum number of reticulations, we  
277 optimized the branch lengths and inheritance probabilities and computed the likelihood of the  
278 best scored network from each of the five maximum reticulation events searches. Network

279 likelihoods were estimated given the individual gene trees using the command ‘CalGTProb’ in  
280 PhyloNet (Yu et al. 2012). Then, we performed model selection using the bias-corrected Akaike  
281 information criterion (AICc; Sugiura 1978), and the Bayesian information criterion (BIC;  
282 Schwarz 1978). The number of parameters was set to the number of branch lengths being  
283 estimated plus the number of hybridization probabilities being estimated. The number of gene  
284 trees used to estimate the likelihood was used to correct for finite sample size. To compare  
285 network models to bifurcating trees, we also estimated bifurcating concatenated ML and  
286 coalescent-based species trees and a plastid tree as previously described with the reduced 11-  
287 species taxon sampling.

288

#### 289 *Hypothesis testing and detecting introgression using four-taxon datasets*

290 Given the signal of multiple clades potentially involved in hybridization events detected by  
291 PhyloNet (see results), we next conducted quartet analyses to explore a single event at a time.  
292 First, we further reduced the 11-taxon(net) dataset to six taxa that included one outgroup genome  
293 (*Mesembryanthemum crystallinum*) and one ingroup from each of the five major ingroup clades:  
294 *Amaranthus hypochondriacus* (genome), *Beta vulgaris* (genome), *Chenopodium quinoa*  
295 (genome), *Caroxylon vermiculatum* (transcriptome), and *Polycnemum majus* (transcriptome) to  
296 represent Amaranthaceae s.s., Betoideae, 'Chenopods I', 'Chenopods II' and Polycnemoideae,  
297 respectively. We carried out a total of ten quartet analyses using all ten four-taxon combinations  
298 that included three out of five ingroup species and one outgroup. We filtered the final set of 105-  
299 taxon orthologs for genes with all four taxa for each combination and inferred individual gene  
300 trees as described before. For each quartet we carried out the following analyses. We first  
301 estimated a species tree with ASTRAL and explored gene tree conflict with PhyParts. We then

302 explored individual gene tree resolution by calculating the Tree Certainty (TC) score (Salichos et  
303 al. 2014) in RAxML using the majority rule consensus tree across the 200 bootstrap replicates.  
304 Next, we explored potential correlation between TC score and alignment length, GC content and  
305 alignment gap proportion using a linear regression model in R v.3.6.1 (R Core Team 2019).  
306 Lastly, we tested for the fit of gene trees to the three possible rooted quartet topologies for each  
307 gene using the approximately unbiased (AU) tests (Shimodaira 2002). We carried out ten  
308 constraint searches for each of three topologies in RAxML with the GTRGAMMA model, then  
309 calculated site-wise log-likelihood scores for the three constraint topologies in RAxML using  
310 GTRGAMMA and carried out the AU test using Consel v.1.20 (Shimodaira and Hasegawa  
311 2001). In order to detect possible introgression among species of each quartet, first we estimated  
312 a species network with PhyloNet using a full maximum likelihood approach (Yu et al. 2014)  
313 with 100 runs per search while optimizing the likelihood of the branch lengths and inheritance  
314 probabilities for every proposed species network. Furthermore, we also carried out the  
315 ABBA/BABA test to detect introgression (Green et al. 2010; Durand et al. 2011) in each of four-  
316 taxon species trees. We calculated the  $D$ -statistic and associated  $z$  score for the null hypothesis of  
317 no introgression ( $D = 0$ ) following each quartet ASTRAL species tree for taxon order assignment  
318 using 100 jackknife replicates and a block size of 10,000 bp with evobR v1.2 (Blackmon and  
319 Adams) in R.

320       Additionally, to detect any non-random genomic block of particular quartet topology  
321 (Fontaine et al. 2015), we mapped the physical location of genes supporting each alternative  
322 quartet topology onto the *Beta vulgaris* reference genome (See Supplemental Information for  
323 details).

324 *Assessment of substitutional saturation, codon usage bias, compositional heterogeneity, and*  
325 *model of sequence evolution misspecification*

326 Analyses were carried out in a 11-taxon dataset [referred herein as 11-taxon(tree)] that included  
327 the same taxa used for species network analyses, but was processed differently to account for  
328 codon structure (see Supplemental Methods for details). Saturation was evaluated by plotting the  
329 uncorrected genetic distances of the concatenated alignment against the inferred distances (see  
330 Supplemental Methods for details). To determine the effect of saturation in the phylogenetic  
331 inferences we estimated individual ML gene trees using an unpartitioned alignment, a partition  
332 by first and second codon positions, and the third codon positions, and by removing all third  
333 codon positions. All tree searches were carried out in RAxML with a GTRGAMMA model and  
334 200 bootstrap replicates. We then estimated a coalescent-based species trees and explored gene  
335 tree discordance with PhyParts.

336 Codon usage bias was evaluated using a correspondence analysis of the Relative  
337 Synonymous Codon Usage (RSCU; see Supplemental Methods for details). To determine the  
338 effect of codon usage bias in the phylogenetic inferences we estimated individual gene trees  
339 using codon-degenerated alignments (see Supplemental Methods for details). Gene tree inference  
340 and discordance analyses were carried out on the same three data schemes as previously  
341 described.

342 Among-lineage compositional heterogeneity was evaluated on individual genes using a  
343 compositional homogeneity test (Supplemental Methods for details). To assess if compositional  
344 heterogeneity had an effect in species tree inference and gene tree discordance, gene trees that  
345 showed the signal of compositional heterogeneity were removed from saturation and codon  
346 usage analyses and the species tree and discordance analyses were rerun.



347 To explore the effect of sequence evolution model misspecification, we reanalyzed the  
348 datasets from the saturation and codon usage analyses using inferred gene trees that accounted  
349 for model selection. Additionally, we also explored saturation and model misspecification in  
350 phylogenetic trees from amino acid alignments (see Supplemental Methods for details).

351

### 352 *Polytomy test*

353 To test if the gene tree discordance among the main clades of Amaranthaceae s.l. could be  
354 explained by polytomies instead of bifurcating nodes, we carried out the quartet-based polytomy  
355 test by Sayyari and Mirarab (2018) as implemented in ASTRAL. We performed the polytomy  
356 test using the gene trees inferred from the saturation and codon usage analyses [11-taxon(tree)  
357 dataset]. Because this test can be sensitive to gene tree error (Sayyari and Mirarab 2018), we  
358 performed a second test using gene trees where branches with less than 75% of bootstrap support  
359 were collapsed.

360

### 361 *Coalescent simulations*

362 To investigate if gene tree discordance can be explained by ILS alone, we carried out coalescent  
363 simulations similar to Cloutier et al. (2019). An ultrametric species tree with branch lengths in  
364 mutational units ( $\mu T$ ) was estimated by constraining an ML tree search of the 11-taxon(net)  
365 concatenated alignment to the ASTRAL species tree topology with a GTR+GAMMA model  
366 while enforcing a strict molecular clock in PAUP v4.0a (build 165; Swofford 2002). The  
367 mutational branch lengths from the constrained tree and branch lengths in coalescent units ( $\tau =$   
368  $T/4N_e$ ) from the ASTRAL species trees were used to estimate the population size parameter theta  
369 ( $\Theta = \mu T/\tau$ ; Degnan and Rosenberg 2009) for internal branches. Terminal branches were set with a

370 population size parameter theta of one. We used the R package Phybase v. 1.4 (Liu and Yu 2010)  
371 that uses the formula from Rannala and Yang (2003) to simulate 10,000 gene trees using the  
372 constraint tree and the estimated theta values. Then we calculated the distribution of Robinson  
373 and Foulds (1981) tree-to-tree distances between the species tree and each gene tree using the R  
374 package Phangorn v2.5.3 (Schliep 2011), and compared this with the distribution of tree-to-tree  
375 distances between the species tree and the simulated gene tree. We ran simulations using the  
376 species tree and associated gene tree distribution from the original no partition 11-taxon(net).

377

378

#### *Test of the anomaly zone*

379 The anomaly zone occurs where a set of short internal branches in the species tree produces gene  
380 trees that differ from the species tree more frequently than those that are concordant [ $a(x)$ ; as  
381 defined in equation 4 of Degnan and Rosenberg (2006)]. To explore if gene tree discordance  
382 observed in Amaranthaceae s.l. is a product of the anomaly zone, we estimated the boundaries of  
383 the anomaly zone [ $a(x)$ ; as defined in equation 4 of Degnan and Rosenberg (2006)] for the  
384 internal nodes of the species tree. Here,  $x$  is the branch length in coalescent units in the species  
385 tree that has a descendant internal branch. If the length of the descendant internal branch ( $y$ ) is  
386 smaller than  $a(x)$ , then the internode pair is in the anomaly zone and is likely to produce anomaly  
387 gene trees (AGTs). We carried out the calculation of  $a(x)$  following Linkem et al. (2016) in the  
388 same 11-taxon(tree) ASTRAL species tree used for coalescent simulations. Additionally, to  
389 establish the frequency of gene trees that were concordant with the estimated species trees, we  
390 quantified the frequency of all 105 possible rooted gene trees with Amaranthaceae s.l. being  
391 monophyletic.

392

393

## RESULTS

394

### *Transcriptome sequencing, assembly, translation, and quality control*

395

Raw reads for the 17 newly generated transcriptomes are available from the NCBI Sequence

396

Read Archive (BioProject: XXXX; Table S2). The number of raw read pairs ranged from 17 to

397

27 million. For the 16 samples processed using RiboZero, organelle reads accounted for 15% to

398

52% of read pairs (Table S2). For *Tidestromia oblongifolia* that poly-A enrichment was carried

399

out in library prep with ~5% of raw reads were from organelle (Table S2). The final number of

400

orthologs was 13,024 with a mean of 9,813 orthologs per species (Table S1). Of those, 82

401

orthologs had a strong signal of recombination ( $P \leq 0.05$ ) and were removed from downstream

402

analyses.

403

404

### *Analysis of the nuclear dataset of Amaranthaceae s.l.*

405

The final set of nuclear orthologous genes included 936 genes with at least 99 out of 105 taxa

406

and 1,000 bp in aligned length after removal of low occupancy columns (the 105-taxon dataset).

407

The concatenated matrix consisted of 1,712,054 columns with a gene and character occupancy of

408

96% and 82%, respectively. The species tree from ASTRAL and the concatenated ML tree from

409

RAxML recovered the exact same topology with most clades having maximal support [i.e.,

410

bootstrap percentage (BS) = 100, local posterior probabilities (LPP) = 1; Fig. 2; Figs S2–S3].

411

Both analyses recovered Chenopodiaceae as monophyletic with the relationships among major

412

clades concordant with the cpDNA analysis from Kadereit et al. (2017; Fig. 1d). Betoideae was

413

placed as sister of Chenopodiaceae, while Polycnemoideae was strongly supported as sister (BS

414

= 97, LPP = 0.98) to the clade composed of Chenopodiaceae and Betoideae. Amaranthaceae s.s.

415 had an overall topology concordant to Kadereit et al. (2017), with the exception of *Iresine*, which  
 416 was recovered among the Aervoids (Fig. 2; Figs S2–S3).  
 417

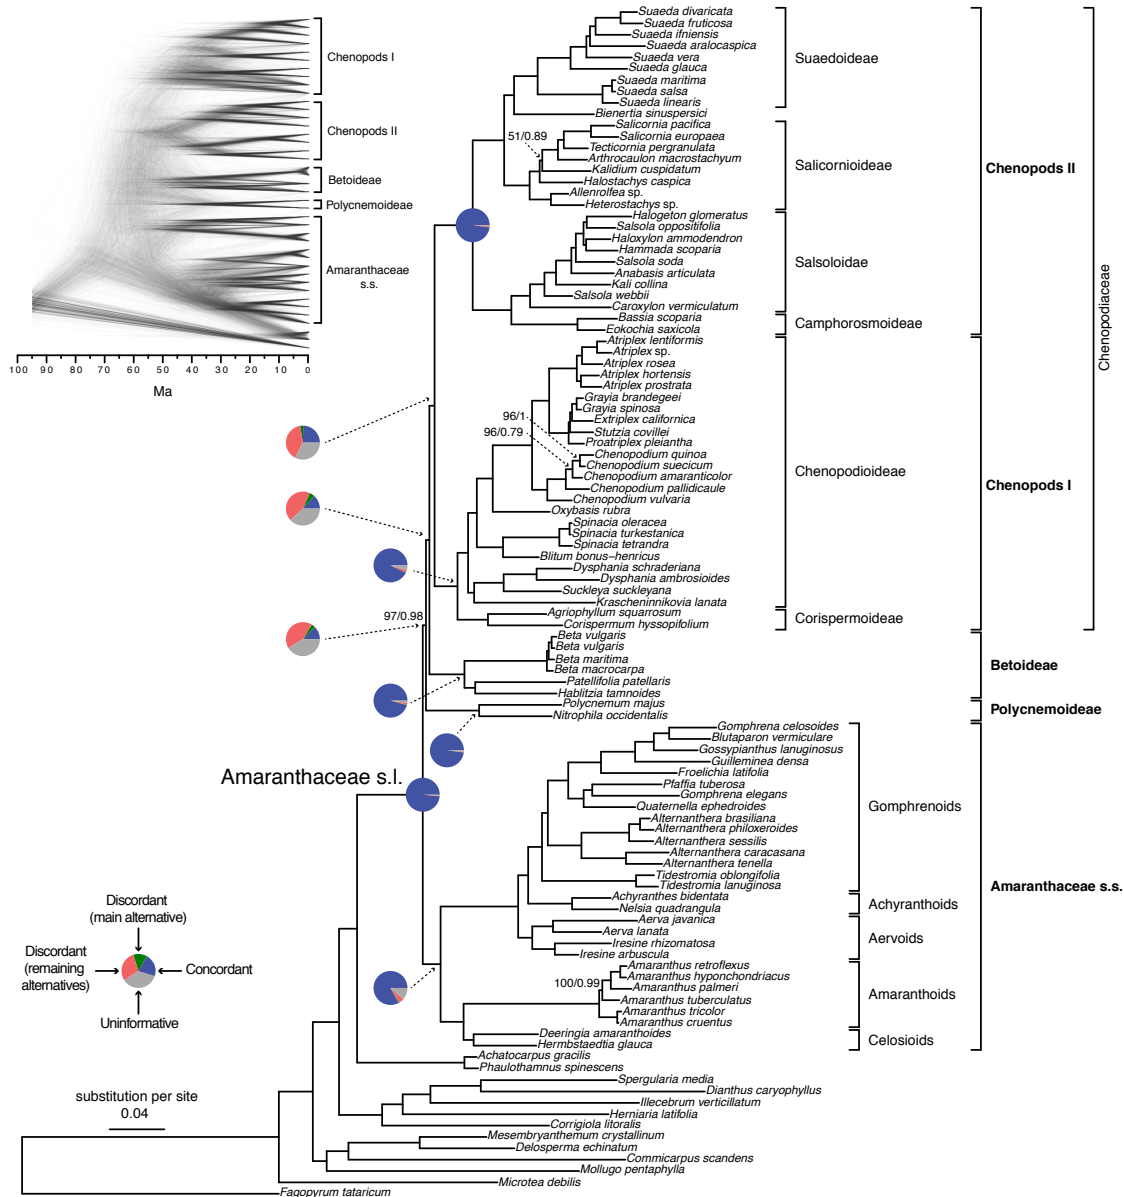

418  
 419 **FIGURE 2.** Maximum likelihood phylogeny of Amaranthaceae s.l. inferred from RAxML  
 420 analysis of the concatenated 936-nuclear gene supermatrix, which had the same topology as  
 421 recovered from ASTRAL. All nodes have maximal support (bootstrap = 100/ASTRAL local  
 422 posterior probability = 1) unless noted. Pie charts present the proportion of gene trees that

423 support that clade (blue), support the main alternative bifurcation (green), support the remaining  
424 alternatives (red), and the proportion (conflict or support) that have < 50% bootstrap support  
425 (gray). Only pie charts for major clades are shown (see Fig. S2 for all node pie charts). Branch  
426 lengths are in number of substitutions per site. The inset (top left) shows the Densitree  
427 cloudogram inferred from 1,242 nuclear genes for the reduced 41-taxon dataset.

428

429         The conflict analyses confirmed the monophyly of Amaranthaceae s.l. with 922 out of  
430 930 informative gene trees being concordant (ICA= 0.94) and having full QS support (1/–/1; i.e.,  
431 all sampled quartets supported that branch). Similarly, the monophyly of Amaranthaceae s.s. was  
432 highly supported by 755 of 809 informative gene trees (ICA =0.85) and the QS scores (0.92/0/1).  
433 The backbone of the family, however, was characterized by high levels of gene tree discordance  
434 (Fig. 2; Figs S2–S3). The monophyly of Chenopodiaceae was supported only by 231 out of 632  
435 informative gene trees (ICA = 0.42) and the QS score (0.25/0.19/0.99) suggested weak quartet  
436 support with a skewed frequency for an alternative placement of two well-defined clades within  
437 Chenopodiaceae, herein referred to as ‘Chenopods I’ and ‘Chenopods II’ (Fig. 2; Figs S2–S3).  
438 ‘Chenopods I’ and ‘Chenopods II’ were each supported by the majority of gene trees, 870 (ICA  
439 = 0.89) and 916 (ICA = 0.91), respectively and full QS support. Similarly, high levels of conflict  
440 among informative gene trees were detected in the placement of Betoideae (126 out of 579  
441 informative genes being concordant, ICA = 0.28; QS score 0.31/0.57/1) and Polycnemoideae  
442 (116/511; ICA = 0.29;0.3/0.81/0.99). The Densitree cloudogram also showed significant conflict  
443 along the backbone of Amaranthaceae s.l. (Fig. 2).

444         Together, analysis of nuclear genes recovered five well-supported clades in  
445 Amaranthaceae s.l.: Amaranthaceae s.s., Betoideae, ‘Chenopods I’, ‘Chenopods II’, and  
446 Polycnemoideae. However, relationships among these five clades showed a high level of conflict

447 among genes [ICA scores and gene counts (pie charts)] and among subsampled quartets (QS  
448 scores), despite having high support from both BS and LPP scores.

449

450 *Plastid phylogenetic analysis of Amaranthaceae s.l.*

451 The final alignment from 76 genes included 103 taxa and 55,517 bp in aligned length. The ML  
452 tree recovered the same five main clades within Amaranthaceae s.l. with maximal support (BS =  
453 100; Figs S4–S6). Within each main clade, relationships were fully congruent with Kadereit et  
454 al. (2017) and mostly congruent with our nuclear analyses. However, the relationship among the  
455 five main clades differed from the nuclear tree. Here, the sister relationships between Betoideae  
456 and 'Chenopods I', and between Amaranthaceae s.s. and Polycnemoideae were both supported by  
457 BS =100. The sister relationship between these two larger clades was moderately supported (BS  
458 = 73), leaving 'Chenopods II' as sister to the rest of Amaranthaceae s.l.

459 Conflict analysis confirmed the monophyly of Amaranthaceae s.l. with 51 out of 69  
460 informative gene trees supporting this clade (ICA = 0.29) and full QS support (1/–/1). On the  
461 other hand, and similar to the nuclear phylogeny, significant gene tree discordance was detected  
462 among plastid genes regarding placement of the five major clades (Figs S4–S6). The sister  
463 relationship of Betoideae and 'Chenopods I' was supported by only 20 gene trees (ICA = 0.06),  
464 but it had a strong support from QS (0.84/0.88/0/94). The relationship between Amaranthaceae  
465 s.s. and Polycnemoideae was supported by only 15 gene trees (ICA = 0.07), while QS showed  
466 weak support (0.41/0.21/0.78) with signals of a supported secondary evolutionary history. The  
467 clade uniting Betoideae, 'Chenopods I', Amaranthaceae s.s., and Polycnemoideae was supported  
468 by only four-gene trees, with counter-support from both QS (-0.29/0.42/0.75) and ICA (-0.03),  
469 suggesting that most gene trees and sampled quartets supported alternative topologies.

470 RNA editing prediction analysis revealed editing sites only on CDS sequences of  
471 reference plastomes (Table S3), suggesting that cpDNA reads in RNA-seq libraries come from  
472 RNA rather than DNA leftover from incomplete DNase digestion during sample processing (See  
473 Discussion for details in plastid assembly from RNA-seq data).

474

475 *Species network analysis of Amaranthaceae s.l.*

476 The reduced 11-taxon(net) dataset included 4,138 orthologous gene alignments with no missing  
477 taxon and a minimum of 1,000 bp (aligned length after removal of low occupancy columns). The  
478 11-taxon(net) ASTRAL species tree was congruent with the 105-taxon tree, while both the  
479 nuclear and plastid ML trees from concatenated supermatrices had different topologies than their  
480 corresponding 105-taxon trees (Fig. 3). PhyloNet identified up to five hybridization events  
481 among the clades of Amaranthaceae s.l. (Fig. 3), with the best model having five hybridization  
482 events involving all five clades (Table S5). ‘Chenopods II’ was involved in hybridization events  
483 in all networks with one to five hybridization events. Model selection indicated that any species  
484 network was a better model than the bifurcating nuclear or plastid trees (Table S5).

485

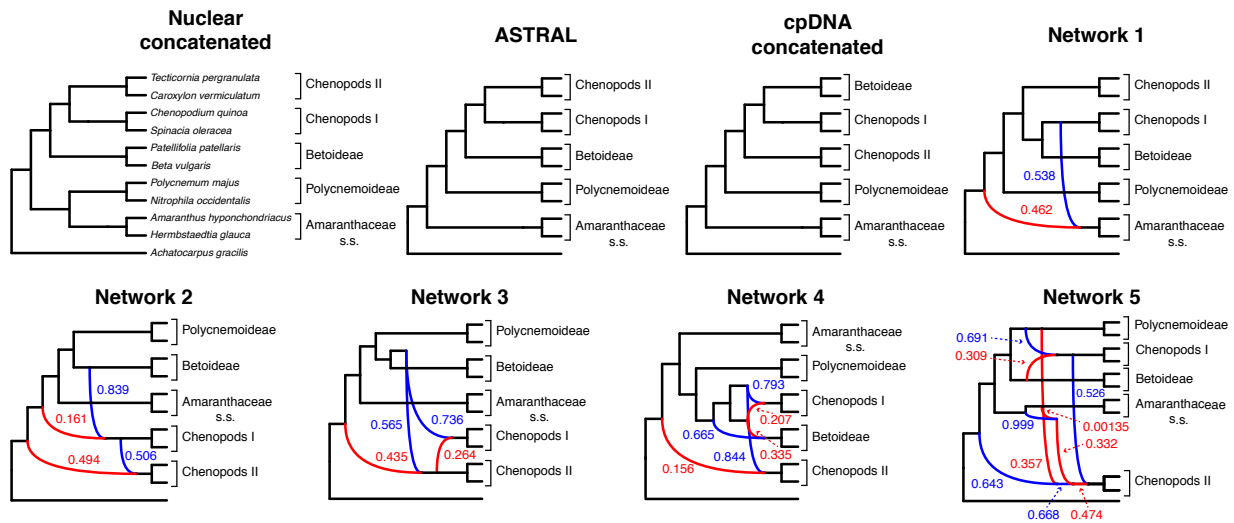



503 except for the quartet of Betoideae, ‘Chenopods II’ and Polycnemoideae (PBC2, which  
 504 correspond to the least frequent gene tree).

505

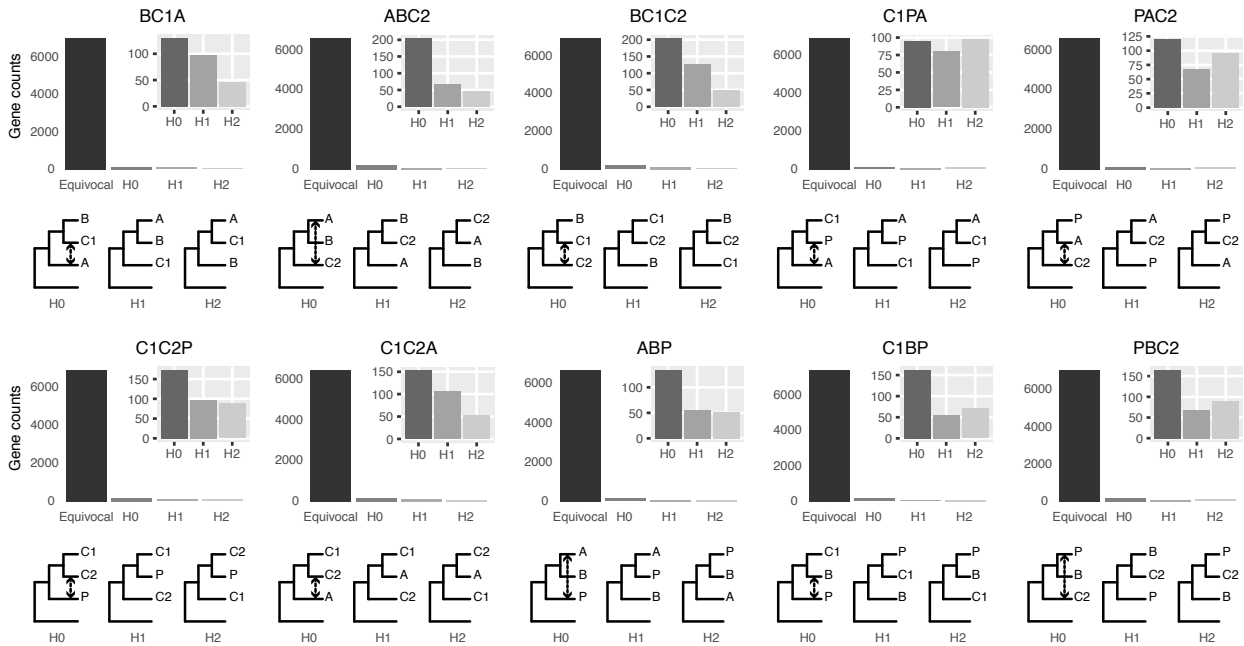

506

507 **FIGURE 4.** Gene counts from Approximate-Unbiased (AU) topology test of the 10 quartets from  
 508 the five main clades of Amaranthaceae s.l. AU tests were carried out between the three possible  
 509 topologies of each quartet. H0 represents the ASTRAL species tree of each quartet. “Equivocal”  
 510 indicates gene trees that fail to reject all three alternative topologies for a quartet with  $p \leq 0.05$ .  
 511 Gene counts for each of the three alternative topologies represent gene trees supporting  
 512 unequivocally one topology by rejecting the other two alternatives with  $p \leq 0.05$ . Insets represent  
 513 gene counts only for unequivocal topology support. Double arrowed lines in each H0 quartet  
 514 represent the direction of introgression from the ABBA/BABA test. Each quartet is named  
 515 following the species tree topology, where the first two species are sister to each other. A =  
 516 Amaranthaceae s.s. (represented by *Amaranthus hypochondriacus*), B = Betoideae (*Beta*  
 517 *vulgaris*), C1 = Chenopods I (*Chenopodium quinoa*), C2 = Chenopods II (*Caroxylum*  
 518 *vermiculatum*), P = Polycnemoideae (*Polycnemonum majus*). All quartets are rooted with  
 519 *Mesembryanthemum crystallinum*.

520

521 In each of the ten quartets, the ASTRAL species tree topology (H0) was the most  
522 frequent among individual gene trees (raw counts) but only accounted for 35%–41% of gene  
523 trees, with the other two alternative topologies having balanced to slightly skewed frequencies  
524 (Fig. S7a; Table S7). Gene counts based on the raw likelihood scores from the constraint  
525 analyses showed similar patterns (Fig. S7b; Table S7). When filtered by significant likelihood  
526 support (i.e.,  $\Delta AICc \geq 2$ ), the number of trees supporting each of the three possible topologies  
527 dropped between 34% and 45%, but the species tree remained the most frequent topology for all  
528 quartets (Fig. S7b; Table S7). The AU topology tests failed to reject ( $P \leq 0.05$ ) approximately  
529 85% of the gene trees for any of the three possible quartet topologies and rejected all but a single  
530 topology in only 3%–4.5% of cases. Among the unequivocally selected gene trees, the  
531 frequencies among the three alternative topologies were similar to ones based on raw likelihood  
532 scores (Fig S7; Table S7). Therefore, topology tests showed that most genes were uninformative  
533 for resolving the relationships among the major groups of Amaranthaceae s.l.

534 Across all ten quartets we found that most genes had very low TC scores (for any single  
535 node the maximum TC value is 1; Supplemental Fig. S8), showing that individual gene trees also  
536 had high levels of conflict among bootstrap replicates, which also indicated uninformative genes  
537 and was concordant with the AU topology test results. We were unable to detect any significant  
538 correlation between TC scores and alignment length, GC content or alignment gap fraction  
539 (Table S8), suggesting that filtering genes by any of these criteria is unlikely to increase the  
540 information content of the dataset.

541 Species network analyses followed by model selection using each of the four-taxon  
542 datasets showed that in seven out of the ten total quartets, the network with one hybridization  
543 event was a better model than any bifurcating tree topology. However, each of the best three

544 networks from PhyloNet had very close likelihood scores and no significant  $\Delta\text{AICc}$  among them  
545 (Table S6; Fig S9). For the remaining three quartets, the species trees (H0) was the best model.

546 The ABBA/BABA test results showed a significant signal of introgression within each of  
547 the ten quartets (Table S9; Fig 4). The possible introgression was detected between six out of the  
548 ten possible pairs of taxa. Potential introgression between Betoideae and Amaranthaceae s.s.,  
549 ‘Chenopods I’ or ‘Chenopods II’, and between ‘Chenopods I’ and Polycnemoideae was not  
550 detected.

551 To further evaluate whether alternative quartets were randomly distributed across the  
552 genome, we mapped quartet topologies of the BC1A quartet onto the reference genome of *Beta*  
553 *vulgaris*. We used the BC1A quartet as an example as all four species in this quartet have  
554 reference genomes. Synteny analysis between the diploid ingroup reference genome *Beta*  
555 *vulgaris* and the diploid outgroup reference genome *Mesembryanthemum crystallinum* recovered  
556 22,179 collinear genes in 516 syntenic blocks. With the collinear ortholog pair information, we  
557 found that of the 8,258 orthologs of the BC1A quartet, 6,941 contained syntenic orthologous  
558 genes within 383 syntenic blocks. The distribution of the BC1A quartet topologies along the  
559 chromosomes of *Beta vulgaris* did not reveal any spatial clustering of any particular topology  
560 along the chromosomes (Fig. S10).

561  
562 *Assessment of substitutional saturation, codon usage bias, compositional heterogeneity,*  
563 *and sequence evolution model misspecification*

564 We assembled a second 11-taxon(tree) dataset that included 5,936 genes and a minimum of 300  
565 bp (aligned length after removal of low occupancy columns) and no missing taxon. The  
566 saturation plots of uncorrected and predicted genetic distances showed that the first and second

567 codon positions were unsaturated ( $y = 0.884x$ ), while the slope of the third codon positions ( $y =$   
568  $0.571x$ ) showed a signal of saturation (Fig. S11). The correspondence analyses of RSCU show  
569 that some codons are more frequently used in different species, but overall the codon usage was  
570 randomly dispersed among all species and not clustered by clade (Fig. S12). This suggests that  
571 the phylogenetic signal is unlikely to be driven by differences in codon usage bias among clades.  
572 Furthermore, only 549 (~9%) genes showed a signal of compositional heterogeneity ( $p < 0.05$ ).  
573 The topology and support (LPP = 1.0) for all branches was the same for the ASTRAL species  
574 trees obtained from the different data schemes while accounting for saturation, codon usage,  
575 compositional heterogeneity, and model of sequence evolution, and was also congruent with the  
576 ASTRAL species tree and concatenated ML from the 105-taxon analyses (Fig. S13). In general,  
577 the proportion of gene trees supporting each bipartition remained the same in every analysis and  
578 showed high levels of conflict among the five major clades of Amaranthaceae s.l. (Fig S13).

579

#### 580 *Polytomy test*

581 The ASTRAL polytomy test resulted in the same bifurcating species tree for the 11-taxon(tree)  
582 dataset and rejected the null hypothesis that any branch is a polytomy ( $p < 0.01$  in all cases).  
583 These results were identical when using gene trees with collapsed branches.

584

#### 585 *Coalescent simulations and tests of the anomaly zone*

586 The distribution of tree-to-tree distances of the empirical and simulated gene trees to the species  
587 tree from the 11-taxon(tree) dataset largely overlapped (Fig 5a), suggesting that ILS alone is able  
588 to explain most of the observed gene tree heterogeneity (Maureira-Butler et al. 2008). The  
589 anomaly zone limit calculations using species trees from the 11-taxon(tree) dataset detected two

590 pairs of internodes among the five major groups in Amaranthaceae s.l. that fell into the anomaly  
 591 zone (the red pair and the green pair, Fig. 5b; Table S10). The gene tree counts showed that the  
 592 species tree was not the most common gene tree topology, as expected for the anomaly zone (Fig  
 593 5c). The species tree was the fourth most common gene tree topology (119 out of 4,425 gene  
 594 trees), while the three most common gene tree topologies occurred 170, 136, and 127 times (Fig.  
 595 5c).  
 596

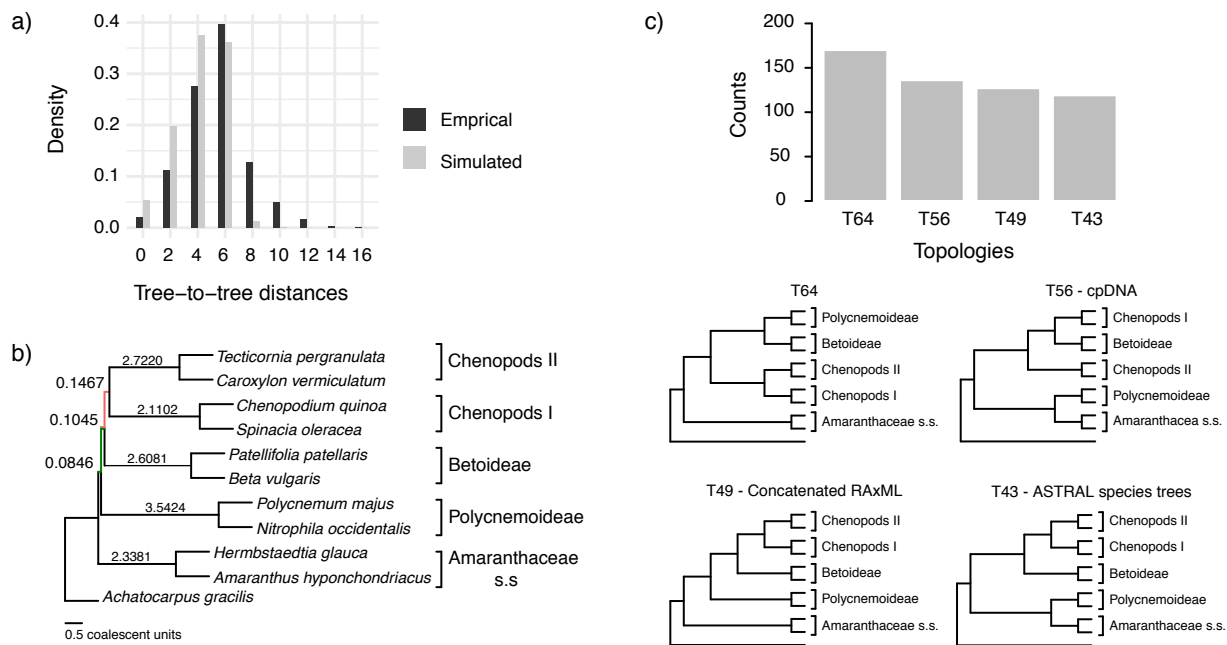

597  
 598 **FIGURE 5.** Coalescent simulations and tests of the anomaly zone from the 11-taxon(tree) dataset  
 599 estimated from individual gene trees. a) Distribution of tree-to-tree distances between empirical  
 600 gene trees and the ASTRAL species tree, compared to those from the coalescent simulation. b)  
 601 ASTRAL species tree showing branch length in coalescent units. Green and red branches  
 602 represent the two pairs of internodes that fall in the anomaly zone (see Table S10 for anomaly  
 603 zone limits). c) Gene tree counts (top) of the four most common topologies (bottom). Gene trees  
 604 that do not support the monophyly of any of the five major clades were ignored.  
 605

606  
607  
608  
609  
610  
611  
612  
613  
614  
615  
616  
617  
618  
619  
620  
621  
622  
623  
624  
625  
626  
627

## DISCUSSION

Using a phylotranscriptomic dataset in combination with reference genomes representing major clades, we have shown that gene tree discordance prevails along the backbone phylogeny of *Amaranthaceae* s.l. Interestingly, we found that this discordance is also present within the plastid dataset. Despite the strong signal of gene tree discordance, we were able to identify five well-supported major clades within *Amaranthaceae* s.l. that are congruent with morphology and previous taxonomic treatments of the group. Using multiple phylogenetic tools and simulations we comprehensively tested for processes that might have contributed to the gene tree discordance in *Amaranthaceae* s.l. Phylogenetic network analyses and ABBA-BABA tests both supported multiple reticulation events among the five major clades in *Amaranthaceae* s.l. At the same time, the patterns of gene tree discordance among these clades can also largely be explained by uninformative gene trees and ILS. We found evidence that three consecutive short internal branches produce anomalous trees contributing to the discordance. Molecular evolution model misspecification (i.e., substitutional saturation, codon usage bias, or compositional heterogeneity) was less likely to account for the gene tree discordance. Furthermore, synteny analysis of reference genomes did not support clustering of any particular topology along the chromosomes. Taken together, no single source can confidently be pointed out to account for the strong signal of gene tree discordance, suggesting that the discordance results primarily from ancient and rapid lineage diversification. Furthermore, the backbone of *Amaranthaceae* s.l. remains—and likely will remain—unresolved even with genome-scale data. Our work highlights problems with identifiability in phylogenetic network analyses, and the need to comprehensively test for multiple sources of conflict in phylogenomic analyses. Below we

628 discuss our findings in detail and ultimately provide a set of recommendations for dissecting  
629 phylogenetic signal in ancient and rapid diversifications.

630

631 *Broad taxonomic circumscription of Amaranthaceae*

632 Both our nuclear and plastid datasets strongly supported five major clades within Amaranthaceae  
633 s.l.: Amaranthaceae s.s., ‘Chenopods I’, ‘Chenopods II’, Betoideae, and Polycnemoideae (Figs. 2  
634 & S4). The monophyly of Amaranthaceae s.s., Betoideae, and Polycnemoideae is consistent with  
635 morphology and recent molecular phylogenetic analyses of these lineages using plastid DNA  
636 (Hohmann et al. 2006; Masson and Kadereit 2013; Di Vincenzo et al. 2018). However, our  
637 nuclear analyses (Fig. 2) supported the monophyly of Chenopodiaceae while the plastid analysis  
638 did not. Both nuclear and plastid datasets showed high levels of conflict among two well-defined  
639 clades, ‘Chenopods I’ and ‘Chenopods II’ (Figs 2 & S4). Weak support and/or conflicting  
640 topologies along the backbone on the Amaranthaceae s.l. characterize all previous molecular  
641 studies of the lineage (Fig. 1), even with hundreds of loci (Walker et al. 2018). On the other  
642 hand, all studies support the five major clades found in our analysis.

643 For the sake of taxonomic stability, we therefore suggest retaining Amaranthaceae s.l.  
644 sensu APG IV (The Angiosperm Phylogeny Group 2016), which includes the previously  
645 recognized Chenopodiaceae. Amaranthaceae s.l. is characterized by a long list of anatomical,  
646 morphological and phytochemical characters such as minute sessile flowers with five tepals, a  
647 single whorl of epitepalous stamens and one basal ovule (Kadereit et al. 2003). Here we  
648 recognize five subfamilies within Amaranthaceae s.l.: Amaranthoideae representing  
649 Amaranthaceae s.s. (incl. Gomphrenoideae Schinz), Betoideae Ulbr., Chenopodioideae  
650 represented as ‘Chenopods I’ here (incl. Corispermoideae Ulbr.), Polycnemoideae Ulbr., and

651 Salicornioideae Ulbr. represented by ‘Chenopods II’ (incl. Salsoloideae Ulbr., Suaedoideae Ulbr.  
652 and Camphorosmoideae A.J. Scott). The stem ages of these five subfamilies date back to the  
653 early Tertiary (Paleocene, Fig. 2) which agrees with dates based on plastid markers (Kadereit et  
654 al. 2012; Di Vincenzo et al. 2018; Yao et al. 2019). Due to the gene tree discordance along the  
655 backbone, the geographic origin of Amaranthaceae s.l. remains ambiguous.

656

657 *Gene tree discordance detected among plastid genes*

658 Although both our concatenation-based plastid and nuclear phylogenies supported the same five  
659 major clades of Amaranthaceae s.l., the relationships among these clades are incongruent (Figs. 2  
660 & S4). Cytonuclear discordance is well-known in plants and it has been traditionally attributed to  
661 reticulate evolution (Rieseberg and Soltis 1991; Sang et al. 1995; Soltis and Kuzoff 1995). Such  
662 discordance continues to be treated as evidence in support of hybridization in more recent  
663 phylogenomic studies that assume the plastome to be a single, linked locus (e.g., Folk et al.  
664 2017; Vargas et al. 2017; Morales-Briones et al. 2018b; Lee-Yaw et al. 2019). However, recent  
665 work shows that plastid protein-coding genes might not necessarily act as a single locus and high  
666 levels of tree conflict have been detected (Gonçalves et al. 2019; Walker et al. 2019).

667 In Amaranthaceae s.l., previous studies based on plastid protein-coding genes or introns  
668 (Fig. 1; Kadereit et al. 2003; Müller and Borsch 2005; Hohmann et al. 2006; Kadereit et al.  
669 2017) resulted in different relationships among the five main clades and none in agreement with  
670 our 76-gene plastid phylogeny. Our conflict and QS analyses of the plastid dataset (Figs S5–S6)  
671 revealed strong signals of gene tree discordance among the five major clades of Amaranthaceae  
672 s.l., likely due to heteroplasmy, although the exact sources of conflict are yet to be clarified  
673 (Gonçalves et al. 2019). Unlike the results found by Walker et al. (2019), our individual plastid



674 gene trees had highly supported nodes (i.e.,  $BS \geq 70$ , Fig S5), suggesting that low phylogenetic  
675 information content is not the main source of conflict in our plastid dataset.

676 Our results support previous studies showing RNA-seq data can be a reliable source for  
677 plastome assembly (Smith 2013; Osuna-Mascaró et al. 2018; Gitzendanner et al. 2018) RNA-seq  
678 libraries can contain some genomic DNA due to incomplete digestion during RNA purification  
679 (Smith 2013) and given the AT-rich nature of plastomes, this allows plastid DNA to survive the  
680 poly-A selection during mRNA enrichment (Schliesky et al. 2012). However, RNA editing  
681 prediction results showed that our Amaranthaceae s.l. cpDNA assemblies came from RNA rather  
682 than DNA contamination regardless of library preparation by poly-A enrichment (71  
683 transcriptomes) or RiboZero (16 transcriptomes). Similarly, Osuna-Mascaró et al. (2018) also  
684 found highly similar plastome assemblies (i.e., general genome structure, and gene number and  
685 composition) from RNA-seq and genomic libraries, supporting the idea that plastomes are fully  
686 transcribed in photosynthetic eukaryotes (Shi et al. 2016). Furthermore, the backbone topology  
687 of our plastid tree built mainly from RNA-seq data (97 out of 105 samples) was consistent with a  
688 recent complete plastome phylogeny of Caryophyllales mainly from genomic DNA (Yao et al.  
689 2019), showing the utility of recovering plastid gene sequences from RNA-seq data.  
690 Nonetheless, RNA editing might be problematic when combining samples from RNA and DNA,  
691 especially when resolving phylogenetic relationships among closely related species.

692

### 693 *Identifiability in methods for detecting reticulation events*

694 All methods that we used to detect ancient hybridization inferred the presence of reticulation  
695 events, but our results suggest that such methods are likely to struggle with ancient, rapid  
696 radiations. Rapid advances have been made in recent years in developing methods to infer

697 species networks in the presence of ILS (reviewed in Elworth et al. 2019). These methods have  
698 been increasingly used in phylogenetic studies (e.g., Wen et al. 2016; Copetti et al. 2017;  
699 Morales-Briones et al. 2018a; Crowl et al. 2019). To date, however, species network inference is  
700 still computationally intensive and limited to a small number of species and a few hybridization  
701 events (Hejase and Liu 2016; but see Hejase et al. 2018 and Zhu et al. 2019). Furthermore,  
702 studies evaluating the performance of different phylogenetic network inference approaches are  
703 scarce and restricted to simple hybridization scenarios. Kamneva and Rosenberg (2017) showed  
704 that likelihood methods like Yu et al. (2014) are often robust to ILS and gene tree error when  
705 symmetric hybridization (equal genetic contribution of both parents) events are considered.  
706 While this approach usually does not overestimate hybridization events, it fails to detect skewed  
707 hybridization (unequal genetic contribution of both parents) events in the presence of significant  
708 ILS. Methods developed to scale to larger numbers of species and hybridizations like the ones  
709 using pseudo-likelihood approximations (i.e., Solís-Lemus and Ané 2016; Yu and Nakhleh 2015)  
710 are yet to be evaluated independently, but in the case of the Yu and Nakhleh (2015) method  
711 based on rooted triples, cannot distinguish the correct network when other networks can produce  
712 the same set of triples (Yu and Nakhleh 2015). In contrast, the method of Solís-Lemus and Ané  
713 (2016), based on unrooted quartets, is better at avoiding indistinguishable networks, but it is  
714 limited to only level-1 network scenarios.

715         Applying the above methods to our data set yielded inferences of multiple reticulation  
716 events. The result of our 11-taxon(net) phylogenetic analysis using a pseudo-likelihood approach  
717 detected up to five hybridization events involving all five major clades of Amaranthaceae s.l.  
718 (Fig. 3). Model selection, after calculating the full likelihood of the obtained networks, also  
719 chose the 5-reticulation species as the best model. Likewise, we found that any species network

720 had a better ML score than a bifurcating tree (Table S5). However, further analyses demonstrated  
721 that full likelihood network searches with up to one hybridization event are indistinguishable  
722 from each other (Table S6), resembling a random gene tree distribution. This pattern can  
723 probably be explained by the high levels of gene tree discordance and lack of phylogenetic signal  
724 in the inferred quartet gene trees (Fig. 4), suggesting that the 11-taxon(net) network searches can  
725 potentially overestimate reticulation events due to high levels of gene tree error or ILS.

726 Using the *D*-Statistic (Green et al. 2010; Durand et al. 2011) we also detected signals of  
727 introgression in seven possible directions among the five main groups of Amaranthaceae s.l.  
728 (Table S9). The inferred introgression events agreed with at least one of the reticulation  
729 scenarios from the phylogenetic network analysis. However, the *D*-Statistic did not detect any  
730 introgression that involves Betoideae, which was detected in the phylogenetic network analysis  
731 with either four or five reticulations events. The *D*-Statistic has been shown to be robust to a  
732 wide range of divergence times, but it is sensitive to relative population size (Zheng and Janke  
733 2018), which agrees with the notion that large effective population sizes and short branches  
734 increase the chances of ILS (Pamilo and Nei 1988) and in turn can dilute the signal for the *D*-  
735 Statistic (Zheng and Janke 2018). Recently, Elworth et al. (2018) found that multiple or ‘hidden’  
736 reticulations can cause the signal of the *D*-statistic to be lost or distorted. Furthermore, when  
737 multiple reticulations are present, the traditional approach of subsetting datasets into quartets can  
738 be problematic as it largely underestimates *D* values (Elworth et al. 2018). Given short internal  
739 branches in the backbone of Amaranthaceae s.l. and the phylogenetic network results showing  
740 multiple hybridizations, it is plausible that our *D*-statistic may be affected by these issues. Our  
741 analysis highlights problems with identifiability in relying on *D*-statistic or phylogenetic network

742 analysis alone for detecting reticulation events, especially in cases of ancient and rapid  
743 diversification.

744

745 *ILS and the Anomaly Zone*

746 ILS is ubiquitous in multi-locus phylogenetic datasets. In its most severe cases ILS produces the  
747 ‘anomaly zone’, defined as a set of short internal branches in the species tree that produce  
748 anomalous gene trees (AGTs) that are more likely than the gene tree that matches the species tree  
749 (Degnan and Rosenberg 2006). Rosenberg (2013) expanded the definition of the anomaly zone  
750 to require that a species tree contain two consecutive internal branches in an ancestor–descendant  
751 relationship in order to produce AGTs. To date, only a few empirical examples of the anomaly  
752 zone have been reported (Linkem et al. 2016; Cloutier et al. 2019). Our results show that the  
753 species tree of Amaranthaceae s.l. has three consecutive short internal branches that lay within  
754 the limits of the anomaly zone (i.e.,  $y < a[x]$ ; Fig. 5; Table S10) and that the species tree is not  
755 the most frequent gene tree (Fig. 4). While both lines of evidence support the presence of AGTs,  
756 it is important to point out that our quartet analysis showed that most quartet gene trees were  
757 equivocal (94–96%; Fig. 4) and were therefore uninformative. Huang and Knowles (2009)  
758 pointed out that the gene tree discordance produced from the anomaly zone can alternatively be  
759 produced by uninformative gene trees and that for species trees with short branches the most  
760 probable gene tree topology is a polytomy rather than an AGT. Our ASTRAL polytomy test,  
761 however, rejected a polytomy along the backbone of Amaranthaceae s.l. in any of the gene tree  
762 sets used. While we did not test for polytomies in individual gene trees, our ASTRAL polytomy  
763 test using gene trees with branches of <75% bootstrap support collapsed also rejected the  
764 presence of a polytomy. Therefore the distribution of gene tree frequency in combination with

765 short internal branches in the species tree supports the presence of an anomaly zone in  
766 *Amaranthaceae* s.l.

767

768 *Considerations in distinguishing sources of gene tree discordance*

769 The exploration of gene tree discordance has become a fundamental step to understand  
770 recalcitrant relationships across the Tree of Life. Recently, new tools have been developed to  
771 identify and visualize gene tree discordance (e.g., Salichos et al. 2014; Smith et al. 2015; Huang  
772 et al. 2016; Pease et al. 2018). However, downstream methods that evaluate processes generating  
773 observed patterns of gene tree discordance are still in their infancy. In this study, by combining  
774 transcriptomes and genomes, we were able to create a rich and dense dataset to start to tease  
775 apart alternative hypotheses concerning the sources of conflict along the backbone phylogeny of  
776 *Amaranthaceae* s.l. We found that gene tree heterogeneity observed in *Amaranthaceae* s.l. can be  
777 explained by a combination of processes, including ILS, hybridization, uninformative genes, and  
778 molecular evolution model misspecification, that might have acted simultaneously and/or  
779 cumulatively.

780 Our results highlight the need to test for multiple sources of conflict in phylogenomic  
781 analyses, especially when trying to resolve phylogenetic relationships with extensive  
782 phylogenetic conflict. Furthermore, we need to be aware of the strengths and limitations of  
783 different phylogenetic methods and be cautious about relying on any single analysis, for example  
784 in the usage of phylogenetics species networks over coalescent-based species trees (Blair and  
785 Ané 2019). We make the following recommendation on five essential steps towards exploring  
786 heterogeneous phylogenetic signals in phylogenomic datasets in general. 1) Study design:  
787 consider whether the taxon sampling and marker choice enable testing alternative sources of

788 conflicting phylogenetic signal. For example, will there be sufficient phylogenetic signal and  
789 sufficient taxon coverage in individual gene trees for methods such as phylogenetic network  
790 analyses? 2) Data processing: care should be taken in data cleaning, partitioning (e.g., nuclear vs.  
791 plastid), and using orthology inference methods that explicitly address paralogy issues (e.g., tree-  
792 based orthology inference and synteny information). 3) Species tree inference using tools that  
793 accommodate the dataset size and data type (e.g., ASTRAL for gene tree-based inferences or  
794 SVDquartet [Chifman and Kubatko, 2014] for SNP-based inferences), followed by visualization  
795 of phylogenetic conflict using tools such as the pie charts (e.g., PhyParts) and quartet-based tools  
796 (e.g., Quartet Sampling) 4) Phylogenetic network analysis using reduced taxon sampling given  
797 results in step 3; 5) Hypothesis testing given the results of steps 3 and 4. Depending on the  
798 scenario, these can include testing for model misspecification, anomaly zone, uninformative gene  
799 tree, and if hybridization is hypothesized, testing putative reticulation events one at a time, as  
800 illustrated in this study. The backbone phylogeny of Amaranthaceae s.l. remains difficult to  
801 resolve despite employing genome-scale data, a situation that may not be atypical across the Tree  
802 of Life. As we leverage more genomic data and explore gene tree discordance in more detail,  
803 these steps will be informative in other clades, especially in those that are products of ancient  
804 and rapid lineage diversification (e.g., Widhelm et al. 2019). Ultimately, such endeavors will be  
805 instrumental in gaining a full understanding of the complexity of the Tree of Life.

806

807

#### SUPPLEMENTARY MATERIAL

808

Data available from the Dryad Digital Repository: [http://dx.doi.org/10.5061/.\[NNNN\]](http://dx.doi.org/10.5061/.[NNNN])

809

810

811 **ACKNOWLEDGMENTS**

812 The authors thank H. Freitag, J.M. Bena and the Millennium Seed Bank for providing seeds; U.  
813 Martiné for assisting with RNA extraction; N. Wang for sample sequencing. A. Crum, R. Ree, B.  
814 Carstens, and three anonymous reviewers for providing helpful comments; the Minnesota  
815 Supercomputing Institute (MSI) at the University of Minnesota for providing access to  
816 computational resources. This work was supported by the University of Minnesota, the  
817 University of Michigan, the US National Science Foundation (DEB 1354048), and the  
818 Department of Energy, Office of Science, Genomic Science Program (Contract Number DE-  
819 SC0008834).

820

821 **REFERENCES**

- 822 Alda F., Tagliacollo V.A., Bernt M.J., Waltz B.T., Ludt W.B., Faircloth B.C., Alfaro M.E.,  
823 Albert J.S., Chakrabarty P. 2019. Resolving Deep Nodes in an Ancient Radiation of  
824 Neotropical Fishes in the Presence of Conflicting Signals from Incomplete Lineage  
825 Sorting. *Syst. Biol.* 68:573–593.
- 826 Bankevich A., Nurk S., Antipov D., Gurevich A.A., Dvorkin M., Kulikov A.S., Lesin V.M.,  
827 Nikolenko S.I., Pham S., Prjibelski A.D., Pyshkin A.V., Sirotkin A.V., Vyahhi N., Tesler  
828 G., Alekseyev M.A., Pevzner P.A. 2012. SPAdes: A New Genome Assembly Algorithm  
829 and Its Applications to Single-Cell Sequencing. *J. Comput. Biol.* 19:455–477.
- 830 Bena M.J., Acosta J.M., Aagesen L. 2017. Macroclimatic niche limits and the evolution of C4  
831 photosynthesis in Gomphrenoideae (Amaranthaceae). *Bot. J. Linn. Soc.* 184:283–297.
- 832 Blackmon H., Adams R.A. 2015 EvobiR: Tools for comparative analyses and teaching  
833 evolutionary biology. doi:10.5281/zenodo.30938

- 834 Blair C., Ané C. 2019. Phylogenetic Trees and Networks Can Serve as Powerful and  
835 Complementary Approaches for Analysis of Genomic Data. *Syst. Biol.* syz056
- 836 Bouckaert R., Heled J. 2014. DensiTree 2: Seeing Trees Through the Forest. *BioRxiv.* 012401.
- 837 Brown J.W., Walker J.F., Smith S.A. 2017. Phyx - phylogenetic tools for unix. *Bioinformatics.*  
838 33:1886–1888.
- 839 Bruen T.C., Philippe H., Bryant D. 2006. A Simple and Robust Statistical Test for Detecting the  
840 Presence of Recombination. *Genetics.* 172:2665–2681.
- 841 Buckley T.R., Cordeiro M., Marshall D.C., Simon C. 2006. Differentiating between Hypotheses  
842 of Lineage Sorting and Introgression in New Zealand Alpine Cicadas (*Maoricicada*  
843 *Dugdale*). *Syst. Biol.* 55:411–425.
- 844 Chen L.-Y., Morales-Briones D.F., Passow C.N., Yang Y. 2019. Performance of gene expression  
845 analyses using de novo assembled transcripts in polyploid species. *Bioinformatics.*  
846 35:4314–4320.
- 847 Chifman J., Kubatko L. 2014. Quartet Inference from SNP Data Under the Coalescent Model.  
848 *Bioinformatics.* 30:3317–3324.
- 849 Cloutier A., Sackton T.B., Grayson P., Clamp M., Baker A.J., Edwards S.V. 2019. Whole-  
850 Genome Analyses Resolve the Phylogeny of Flightless Birds (*Palaeognathae*) in the  
851 Presence of an Empirical Anomaly Zone. *Syst. Biol.* 68:937–955
- 852 Cooper E.D. 2014. Overly simplistic substitution models obscure green plant phylogeny. *Trends*  
853 *Plant Sci.* 19:576–582.
- 854 Copetti D., Búrquez A., Bustamante E., Charboneau J.L.M., Childs K.L., Eguiarte L.E., Lee S.,  
855 Liu T.L., McMahon M.M., Whiteman N.K., Wing R.A., Wojciechowski M.F., Sanderson



- 856 M.J. 2017. Extensive gene tree discordance and hemiplasy shaped the genomes of North  
857 American columnar cacti. *Proc. Natl. Acad. Sci.* 114:12003–12008.
- 858 Cox C.J., Li B., Foster P.G., Embley T.M., Civián P. 2014. Conflicting Phylogenies for Early  
859 Land Plants are Caused by Composition Biases among Synonymous Substitutions. *Syst.*  
860 *Biol.* 63:272–279.
- 861 Crowl A.A., Manos P.S., McVay J.D., Lemmon A.R., Lemmon E.M., Hipp A.L. 2019.  
862 Uncovering the genomic signature of ancient introgression between white oak lineages  
863 (*Quercus*). *New Phytol.* nph.15842.
- 864 Davidson N.M., Oshlack A. 2014. Corset: enabling differential gene expression analysis for de  
865 novo assembled transcriptomes. *Genome Biol.* 15:57.
- 866 Degnan J.H., Rosenberg N.A. 2006. Discordance of Species Trees with Their Most Likely Gene  
867 Trees. *PLoS Genet.* 2:e68.
- 868 Degnan J.H., Rosenberg N.A. 2009. Gene tree discordance, phylogenetic inference and the  
869 multispecies coalescent. *Trends Ecol. Evol.* 24:332–340.
- 870 Di Vincenzo V., Gruenstaeudl M., Nauheimer L., Wondafrash M., Kamau P., Demissew S.,  
871 Borsch T. 2018. Evolutionary diversification of the African achyranthoid clade  
872 (*Amaranthaceae*) in the context of sterile flower evolution and epizoochory. *Ann. Bot.*  
873 122:69–85.
- 874 Dohm J.C., Minoche A.E., Holtgräwe D., Capella-Gutiérrez S., Zakrzewski F., Tafer H., Rupp  
875 O., Sörensen T.R., Stracke R., Reinhardt R., Goesmann A., Kraft T., Schulz B., Stadler  
876 P.F., Schmidt T., Gabaldón T., Lehrach H., Weisshaar B., Himmelbauer H. 2014. The  
877 genome of the recently domesticated crop plant sugar beet (*Beta vulgaris*). *Nature.*  
878 505:546–549.

- 879 Doyle J.J. 1992. Gene Trees and Species Trees: Molecular Systematics as One-Character  
880 Taxonomy. *Syst. Bot.* 17:144.
- 881 Durand E.Y., Patterson N., Reich D., Slatkin M. 2011. Testing for Ancient Admixture between  
882 Closely Related Populations. *Mol. Biol. Evol.* 28:2239–2252.
- 883 Edwards S.V. 2009. Is A New and General Theory of Molecular Systematics Emerging?  
884 Evolution. 63:1–19.
- 885 Edwards S.V., Xi Z., Janke A., Faircloth B.C., McCormack J.E., Glenn T.C., Zhong B., Wu S.,  
886 Lemmon E.M., Lemmon A.R., Leaché A.D., Liu L., Davis C.C. 2016. Implementing and  
887 testing the multispecies coalescent model: A valuable paradigm for phylogenomics. *Mol.*  
888 *Phylogenet. Evol.* 94:447–462.
- 889 Elworth R.A.L., Allen C., Benedict T., Dulworth P., Nakhleh L.K. 2018. DGEN: A Test Statistic  
890 for Detection of General Introgression Scenarios. *WABI*.
- 891 Elworth R.A.L., Ogilvie H.A., Zhu J., Nakhleh L. 2019. Advances in Computational Methods for  
892 Phylogenetic Networks in the Presence of Hybridization. In: Warnow T., editor.  
893 *Bioinformatics and Phylogenetics: Seminal Contributions of Bernard Moret*. Cham:  
894 Springer International Publishing. p. 317–360.
- 895 Erfan Sayyari, Siavash Mirarab. 2018. Testing for Polytomies in Phylogenetic Species Trees  
896 Using Quartet Frequencies. *Genes.* 9:132.
- 897 Flowers T.J., Colmer T.D. 2015. Plant salt tolerance: adaptations in halophytes. *Ann. Bot.*  
898 115:327–331.
- 899 Folk R.A., Mandel J.R., Freudenstein J.V. 2017. Ancestral Gene Flow and Parallel Organellar  
900 Genome Capture Result in Extreme Phylogenomic Discord in a Lineage of Angiosperms.  
901 *Syst. Biol.* 66:320-337.

- 902 Fontaine M.C., Pease J.B., Steele A., Waterhouse R.M., Neafsey D.E., Sharakhov I.V., Jiang X.,  
903 Hall A.B., Catteruccia F., Kakani E., Mitchell S.N., Wu Y.-C., Smith H.A., Love R.R.,  
904 Lawniczak M.K., Slotman M.A., Emrich S.J., Hahn M.W., Besansky N.J. 2015.  
905 Extensive introgression in a malaria vector species complex revealed by phylogenomics.  
906 *Science*. 347:1258524.
- 907 Foster P.G. 2004. Modeling Compositional Heterogeneity. *Syst. Biol.* 53:485–495.
- 908 Galtier N., Daubin V. 2008. Dealing with incongruence in phylogenomic analyses. *Philos. Trans.*  
909 *R. Soc. B Biol. Sci.* 363:4023–4029.
- 910 Gitzendanner M.A., Soltis P.S., Yi T.-S., Li D.-Z., Soltis D.E. 2018. Plastome Phylogenetics: 30  
911 Years of Inferences Into Plant Evolution. *Plastid Genome Evolution*. Elsevier. p. 293–  
912 313.
- 913 Gonçalves D.J.P., Simpson B.B., Ortiz E.M., Shimizu G.H., Jansen R.K. 2019. Incongruence  
914 between gene trees and species trees and phylogenetic signal variation in plastid genes.  
915 *Mol. Phylogenet. Evol.* 138:219–232.
- 916 Grabherr M.G., Haas B.J., Yassour M., Levin J.Z., Thompson D.A., Amit I., Adiconis X., Fan  
917 L., Raychowdhury R., Zeng Q., Chen Z., Mauceli E., Hacohen N., Gnirke A., Rhind N.,  
918 di Palma F., Birren B.W., Nusbaum C., Lindblad-Toh K., Friedman N., Regev A. 2011.  
919 Full-length transcriptome assembly from RNA-Seq data without a reference genome.  
920 *Nat. Biotechnol.* 29:644–652.
- 921 Green R.E., Krause J., Briggs A.W., Maricic T., Stenzel U., Kircher M., Patterson N., Li H., Zhai  
922 W., Fritz M.H.Y., Hansen N.F., Durand E.Y., Malaspinas A.S., Jensen J.D., Marques-  
923 Bonet T., Alkan C., Prufer K., Meyer M., Burbano H.A., Good J.M., Schultz R., Aximu-  
924 Petri A., Butthof A., Hober B., Hoffner B., Siegemund M., Weihmann A., Nusbaum C.,

- 925 Lander E.S., Russ C., Novod N., Affourtit J., Egholm M., Verna C., Rudan P., Brajkovic  
926 D., Kucan Z., Gusic I., Doronichev V.B., Golovanova L.V., Lalueza-Fox C., de la Rasilla  
927 M., Fortea J., Rosas A., Schmitz R.W., Johnson P.L.F., Eichler E.E., Falush D., Birney  
928 E., Mullikin J.C., Slatkin M., Nielsen R., Kelso J., Lachmann M., Reich D., Paabo S.  
929 2010. A Draft Sequence of the Neandertal Genome. *Science*. 328:710–722.
- 930 Hejase H.A., Liu K.J. 2016. A scalability study of phylogenetic network inference methods using  
931 empirical datasets and simulations involving a single reticulation. *BMC Bioinformatics*.  
932 17:422.
- 933 Hejase H.A., VandePol N., Bonito G.M., Liu K.J. 2018. FastNet: Fast and Accurate Statistical  
934 Inference of Phylogenetic Networks Using Large-Scale Genomic Sequence Data. *Comp.*  
935 *Genomics*.:242–259.
- 936 Hernández-Ledesma P., Berendsohn W.G., Borsch T., Mering S.V., Akhani H., Arias S.,  
937 Castañeda-Noa I., Eggli U., Eriksson R., Flores-Olvera H., Fuentes-Bazán S., Kadereit  
938 G., Klak C., Korotkova N., Nyffeler R., Ocampo G., Ochoterena H., Oxelman B.,  
939 Rabeler R.K., Sanchez A., Schlumpberger B.O., Uotila P. 2015. A taxonomic backbone  
940 for the global synthesis of species diversity in the angiosperm order Caryophyllales.  
941 *Willdenowia*. 45:281.
- 942 Hoang D.T., Chernomor O. 2018. UFBoot2: Improving the Ultrafast Bootstrap Approximation.  
943 *Mol. Biol. Evol.* 35:518–522.
- 944 Hohmann S., Kadereit J.W., Kadereit G. 2006. Understanding Mediterranean-Californian  
945 disjunctions: molecular evidence from Chenopodiaceae-Betoideae. *TAXON*. 55:67–78.
- 946 Holder M.T., Anderson J.A., Holloway A.K. 2001. Difficulties in Detecting Hybridization. *Syst.*  
947 *Biol.* 50:978–982.

- 948 Huang H., Knowles L.L. 2009. What Is the Danger of the Anomaly Zone for Empirical  
949 Phylogenetics? *Syst. Biol.* 58:527–536.
- 950 Huang W., Zhou G., Marchand M., Ash J.R., Morris D., Van Dooren P., Brown J.M., Gallivan  
951 K.A., Wilgenbusch J.C. 2016. TreeScaper: Visualizing and Extracting Phylogenetic  
952 Signal from Sets of Trees. *Mol. Biol. Evol.* 33:3314–3316.
- 953 Jarvis D.E., Ho Y.S., Lightfoot D.J., Schmöckel S.M., Li B., Borm T.J.A., Ohyanagi H., Mineta  
954 K., Michell C.T., Saber N., Kharbatia N.M., Rupper R.R., Sharp A.R., Dally N.,  
955 Boughton B.A., Woo Y.H., Gao G., Schijlen E.G.W.M., Guo X., Momin A.A., Negrão  
956 S., Al-Babili S., Gehring C., Roessner U., Jung C., Murphy K., Arold S.T., Gojobori T.,  
957 Linden C.G.V.D., van Loo E.N., Jellen E.N., Maughan P.J., Tester M. 2017. The genome  
958 of *Chenopodium quinoa*. *Nature*. 542:307–312.
- 959 Kadereit G., Ackerly D., Pirie M.D. 2012. A broader model for C<sub>4</sub> photosynthesis evolution in  
960 plants inferred from the goosefoot family (Chenopodiaceae s.s.). *Proc. R. Soc. B Biol.*  
961 *Sci.* 279:3304–3311.
- 962 Kadereit G., Borsch T., Weising K., Freitag H. 2003. Phylogeny of Amaranthaceae and  
963 Chenopodiaceae and the Evolution of C<sub>4</sub> Photosynthesis. *Int. J. Plant Sci.* 164:959–986.
- 964 Kadereit G., Hohmann S., Kadereit J.W. 2006. A synopsis of Chenopodiaceae subfam. Betoideae  
965 and notes on the taxonomy of *Beta*. *Willdenowia*. 36:9–19.
- 966 Kadereit G., Newton R.J., Vandeloos F. 2017. Evolutionary ecology of fast seed germination—  
967 A case study in Amaranthaceae/Chenopodiaceae. *Perspect. Plant Ecol. Evol. Syst.* 29:1–  
968 11.

- 969 Kalyaanamoorthy S., Minh B.Q., Wong T.K.F., von Haeseler A., Jermini L.S. 2017.  
970 ModelFinder: fast model selection for accurate phylogenetic estimates. *Nat. Methods*.  
971 14:587–589.
- 972 Kamneva O.K., Rosenberg N.A. 2017. Simulation-Based Evaluation of Hybridization Network  
973 Reconstruction Methods in the Presence of Incomplete Lineage Sorting. *Evol.*  
974 *Bioinforma.* 13:117693431769193.
- 975 Katoh K., Standley D.M. 2013. MAFFT Multiple Sequence Alignment Software Version 7:  
976 Improvements in Performance and Usability. *Mol. Biol. Evol.* 30:772–780.
- 977 Kearse M., Moir R., Wilson A., Stones-Havas S., Cheung M., Sturrock S., Buxton S., Cooper A.,  
978 Markowitz S., Duran C., Thierer T., Ashton B., Meintjes P., Drummond A. 2012.  
979 Geneious Basic: An integrated and extendable desktop software platform for the  
980 organization and analysis of sequence data. *Bioinformatics.* 28:1647–1649.
- 981 Knowles L.L., Huang H., Sukumaran J., Smith S.A. 2018. A matter of phylogenetic scale:  
982 Distinguishing incomplete lineage sorting from lateral gene transfer as the cause of gene  
983 tree discord in recent versus deep diversification histories. *Am. J. Bot.* 105:376–384.
- 984 Kubatko L.S., Chifman J. 2019. An invariants-based method for efficient identification of hybrid  
985 species from large-scale genomic data. *BMC Evol. Biol.* 19:112.
- 986 Lanfear R., Calcott B., Ho S.Y.W., Guindon S. 2012. PartitionFinder: Combined Selection of  
987 Partitioning Schemes and Substitution Models for Phylogenetic Analyses. *Mol. Biol.*  
988 *Evol.* 29:1695–1701.
- 989 Lee-Yaw J.A., Grassa C.J., Joly S., Andrew R.L., Rieseberg L.H. 2019. An evaluation of  
990 alternative explanations for widespread cytonuclear discordance in annual sunflowers  
991 (*Helianthus*). *New Phytol.* 221:515–526.

- 992 Lightfoot D.J., Jarvis D.E., Ramaraj T., Lee R., Jellen E.N., Maughan P.J. 2017. Single-molecule  
993 sequencing and Hi-C-based proximity-guided assembly of amaranth (*Amaranthus*  
994 *hypochondriacus*) chromosomes provide insights into genome evolution. BMC Biol.  
995 15:74.
- 996 Linkem C.W., Minin V.N., Leaché A.D. 2016. Detecting the Anomaly Zone in Species Trees  
997 and Evidence for a Misleading Signal in Higher-Level Skink Phylogeny (Squamata:  
998 Scincidae). Syst. Biol. 65:465–477.
- 999 Liu L., Yu L. 2010. Phybase: an R package for species tree analysis. Bioinformatics. 26:962–  
1000 963.
- 1001 Liu Y., Cox C.J., Wang W., Goffinet B. 2014. Mitochondrial Phylogenomics of Early Land  
1002 Plants: Mitigating the Effects of Saturation, Compositional Heterogeneity, and Codon-  
1003 Usage Bias. Syst. Biol. 63:862–878.
- 1004 Maddison W.P. 1997. Gene Trees in Species Trees. Syst. Biol. 46:532–536.
- 1005 Masson R., Kadereit G. 2013. Phylogeny of Polycnemoideae (Amaranthaceae): Implications for  
1006 biogeography, character evolution and taxonomy. TAXON. 62:100–111.
- 1007 Maureira-Butler I.J., Pfeil B.E., Muangprom A., Osborn T.C., Doyle J.J. 2008. The Reticulate  
1008 History of *Medicago* (Fabaceae). Syst. Biol. 57:466–482.
- 1009 Mclean B.S., Bell K.C., Allen J.M., Helgen K.M., Cook J.A. 2019. Impacts of Inference Method  
1010 and Data set Filtering on Phylogenomic Resolution in a Rapid Radiation of Ground  
1011 Squirrels (Xerinae: Marmotini). Syst. Biol. 68:298–316.
- 1012 Meyer B.S., Matschiner M., Salzburger W. 2017. Disentangling Incomplete Lineage Sorting and  
1013 Introgression to Refine Species-Tree Estimates for Lake Tanganyika Cichlid Fishes. Syst.  
1014 Biol. 66:531–550.

- 1015 Mirarab S., Bayzid M.S., Warnow T. 2016. Evaluating Summary Methods for Multilocus  
1016 Species Tree Estimation in the Presence of Incomplete Lineage Sorting. *Syst. Biol.*  
1017 65:366–380.
- 1018 Morales-Briones D.F., Liston A., Tank D.C. 2018a. Phylogenomic analyses reveal a deep history  
1019 of hybridization and polyploidy in the Neotropical genus *Lachemilla* (Rosaceae). *New*  
1020 *Phytol.* 218:1668–1684.
- 1021 Morales-Briones D.F., Romoleroux K., Kolář F., Tank D.C. 2018b. Phylogeny and Evolution of  
1022 the Neotropical Radiation of *Lachemilla* (Rosaceae): Uncovering a History of Reticulate  
1023 Evolution and Implications for Infrageneric Classification. *Syst. Bot.* 43:17–34.
- 1024 Moray C., Goolsby E.W., Bromham L. 2016. The Phylogenetic Association Between Salt  
1025 Tolerance and Heavy Metal Hyperaccumulation in Angiosperms. *Evol. Biol.* 43:119–  
1026 130.
- 1027 Mower J.P. 2009. The PREP suite: predictive RNA editors for plant mitochondrial genes,  
1028 chloroplast genes and user-defined alignments. *Nucleic Acids Res.* 37:W253–W259.
- 1029 Müller K., Borsch T. 2005. Phylogenetics of Amaranthaceae Based on *matK/trnK* Sequence  
1030 Data: Evidence from Parsimony, Likelihood, and Bayesian Analyses. *Ann. Mo. Bot.*  
1031 *Gard.* 92:66–102.
- 1032 Nguyen L.-T., Schmidt H.A., von Haeseler A., Minh B.Q. 2015. IQ-TREE: A Fast and Effective  
1033 Stochastic Algorithm for Estimating Maximum-Likelihood Phylogenies. *Mol. Biol. Evol.*  
1034 32:268–274.
- 1035 Osuna-Mascaró C., Rubio de Casas R., Perfectti F. 2018. Comparative assessment shows the  
1036 reliability of chloroplast genome assembly using RNA-seq. *Sci. Rep.* 8:17404.



- 1037 Pamilo P., Nei M. 1988. Relationships between Gene Trees and Species Trees. *Mol. Biol. Evol.*  
1038 5:568–583.
- 1039 Pease J.B., Brown J.W., Walker J.F., Hinchliff C.E., Smith S.A. 2018. Quartet Sampling  
1040 distinguishes lack of support from conflicting support in the green plant tree of life. *Am.*  
1041 *J. Bot.* 105:385–403.
- 1042 Piirainen M., Liebisch O., Kadereit G. 2017. Phylogeny, biogeography, systematics and  
1043 taxonomy of Salicornioideae (Amaranthaceae/Chenopodiaceae) – A cosmopolitan, highly  
1044 specialized hygrohalophyte lineage dating back to the Oligocene. *Taxon.* 66:109–132.
- 1045 Prasanna A.N., Gerber D., Kijpornyongpan T., Aime M.C., Doyle V.P., Nagy L.G. 2020. Model  
1046 Choice, Missing Data, and Taxon Sampling Impact Phylogenomic Inference of Deep  
1047 Basidiomycota Relationships. 69:17–37
- 1048 R Core Team. 2019. R: A Language and Environment for Statistical Computing. Vienna,  
1049 Austria: R Foundation for Statistical Computing.
- 1050 Rannala B., Yang Z. 2003. Bayes Estimation of Species Divergence Times and Ancestral  
1051 Population Sizes Using DNA Sequences From Multiple Loci. *Genetics.* 166:1645–1656.
- 1052 Rieseberg L.H., Soltis D.E. 1991. Phylogenetic consequences of cytoplasmic gene flow in plants.  
1053 *Evol. Trends Plants.* 5:65–84.
- 1054 Robinson D.F., Foulds L.R. 1981. Comparison of phylogenetic trees. *Math. Biosci.* 53:131–147.
- 1055 Rosenberg N.A. 2013. Discordance of Species Trees with Their Most Likely Gene Trees: A  
1056 Unifying Principle. *Mol. Biol. Evol.* 30:2709–2713.
- 1057 Roycroft E.J., Moussalli A., Rowe K.C. 2019. Phylogenomics Uncovers Confidence and  
1058 Conflict in the Rapid Radiation of Australo-Papuan Rodents. *Syst. Biol.* syz044.

- 1059 Salichos L., Stamatakis A., Rokas A. 2014. Novel Information Theory-Based Measures for  
1060 Quantifying Incongruence among Phylogenetic Trees. *Mol. Biol. Evol.* 31:1261–1271.
- 1061 Sang T., Crawford D.J., Stuessy T.F. 1995. Documentation of reticulate evolution in peonies  
1062 (*Paeonia*) using internal transcribed spacer sequences of nuclear ribosomal DNA:  
1063 implications for biogeography and concerted evolution. *Proc. Natl. Acad. Sci.* 92:6813–  
1064 6817.
- 1065 Sayyari E., Mirarab S. 2016. Fast Coalescent-Based Computation of Local Branch Support from  
1066 Quartet Frequencies. *Mol. Biol. Evol.* 33:1654–1668.
- 1067 Schliep K.P. 2011. phangorn: phylogenetic analysis in R. *Bioinformatics.* 27:592–593.
- 1068 Schliesky S., Gowik U., Weber A.P.M., Bräutigam A. 2012. RNA-Seq Assembly – Are We  
1069 There Yet? *Front. Plant Sci.* 3.
- 1070 Schwarz G. 1978. Estimating the Dimension of a Model. *Ann. Stat.* 6:461–464.
- 1071 Sharp P.M., Li W.-H. 1986. An evolutionary perspective on synonymous codon usage in  
1072 unicellular organisms. *J. Mol. Evol.* 24:28–38.
- 1073 Shi C., Wang S., Xia E.-H., Jiang J.-J., Zeng F.-C., Gao L.-Z. 2016. Full transcription of the  
1074 chloroplast genome in photosynthetic eukaryotes. *Sci. Rep.* 6:30135.
- 1075 Shimodaira H. 2002. An Approximately Unbiased Test of Phylogenetic Tree Selection. *Syst.*  
1076 *Biol.* 51:492–508.
- 1077 Shimodaira H., Hasegawa M. 2001. CONSEL: for assessing the confidence of phylogenetic tree  
1078 selection. *Bioinformatics.* 17:1246–1247.
- 1079 Smith D.R. 2013. RNA-Seq data: a goldmine for organelle research. *Brief. Funct. Genomics.*  
1080 12:454–456.

- 1081 Smith S.A., Moore M.J., Brown J.W., Yang Y. 2015. Analysis of phylogenomic datasets reveals  
1082 conflict, concordance, and gene duplications with examples from animals and plants.  
1083 BMC Evol. Biol. 15:745.
- 1084 Smith S.A., O’Meara B.C. 2012. treePL: divergence time estimation using penalized likelihood  
1085 for large phylogenies. Bioinformatics. 28:2689–2690.
- 1086 Solís-Lemus C., Ané C. 2016a. Inferring Phylogenetic Networks with Maximum  
1087 Pseudolikelihood under Incomplete Lineage Sorting. PLOS Genet. 12:e1005896.
- 1088 Soltis D.E., Kuzoff R.K. 1995. Discordance between nuclear and chloroplast phylogenies in the  
1089 Heuchera group (Saxifragaceae). Evolution. 49:727–742.
- 1090 Srivastava S.K. 1969. Assorted angiosperm pollen from the Edmonton Formation  
1091 (Maestrichtian), Alberta, Canada. Can. J. Bot. 47:975–989.
- 1092 Stamatakis A. 2014. RAxML version 8 - a tool for phylogenetic analysis and post-analysis of  
1093 large phylogenies. Bioinformatics. 30:1312–1313.
- 1094 Sugiura N. 1978. Further analysts of the data by akaike’ s information criterion and the finite  
1095 corrections. Commun. Stat. - Theory Methods. 7:13–26.
- 1096 Swofford D. 2002. PAUP\*. Phylogenetic analysis using parsimony (\*and other methods) version  
1097 4. Sunderland MA Sinauer Assoc.
- 1098 Than C., Ruths D., Nakhleh L. 2008. PhyloNet: a software package for analyzing and  
1099 reconstructing reticulate evolutionary relationships. BMC Bioinformatics. 9:322–16.
- 1100 The Angiosperm Phylogeny Group, Chase M.W., Christenhusz M.J.M., Fay M.F., Byng J.W.,  
1101 Judd W.S., Soltis D.E., Mabberley D.J., Sennikov A.N., Soltis P.S., Stevens P.F. 2016.  
1102 An update of the Angiosperm Phylogeny Group classification for the orders and families  
1103 of flowering plants: APG IV. Bot. J. Linn. Soc. 181:1–20.

- 1104 Vargas O.M., Ortiz E.M., Simpson B.B. 2017. Conflicting phylogenomic signals reveal a pattern  
1105 of reticulate evolution in a recent high-Andean diversification (Asteraceae: Astereae:  
1106 *Diplostephium*). *New Phytol.* 214:1736–1750.
- 1107 Walker J.F., Walker-Hale N., Vargas O.M., Larson D.A., Stull G.W. 2019. Characterizing gene  
1108 tree conflict in plastome-inferred phylogenies. *PeerJ.* 7:e7747.
- 1109 Walker J.F., Yang Y., Feng T., Timoneda A., Mikenas J., Hutchison V., Edwards C., Wang N.,  
1110 Ahluwalia S., Olivieri J., Walker-Hale N., Majure L.C., Puente R., Kadereit G.,  
1111 Lauterbach M., Eggli U., Flores-Olvera H., Ochoterena H., Brockington S.F., Moore  
1112 M.J., Smith S.A. 2018. From cacti to carnivores: Improved phylotranscriptomic sampling  
1113 and hierarchical homology inference provide further insight into the evolution of  
1114 Caryophyllales. *Am. J. Bot.* 105:446–462.
- 1115 Wen D., Yu Y., Hahn M.W., Nakhleh L. 2016. Reticulate evolutionary history and extensive  
1116 introgression in mosquito species revealed by phylogenetic network analysis. *Mol. Ecol.*  
1117 25:2361–2372.
- 1118 Wen D., Yu Y., Zhu J., Nakhleh L. 2018. Inferring Phylogenetic Networks Using PhyloNet.  
1119 *Syst. Biol.* 67:735–740.
- 1120 Widhelm T.J., Grewe F., Huang J.-P., Mercado-Díaz J.A., Goffinet B., Lücking R., Moncada B.,  
1121 Mason-Gamer R., Lumbsch H.T. 2019. Multiple historical processes obscure  
1122 phylogenetic relationships in a taxonomically difficult group (Lobariaceae, Ascomycota).  
1123 *Sci. Rep.* 9:8968.
- 1124 Xu B., Yang Z. 2016. Challenges in Species Tree Estimation Under the Multispecies Coalescent  
1125 Model. *Genetics.* 204:1353–1368.

- 1126 Xu C., Jiao C., Sun H., Cai X., Wang X., Ge C., Zheng Y., Liu W., Sun X., Xu Y., Deng J.,  
1127 Zhang Z., Huang S., Dai S., Mou B., Wang Q., Fei Z., Wang Q. 2017. Draft genome of  
1128 spinach and transcriptome diversity of 120 *Spinacia* accessions. *Nat. Commun.* 8:15275.
- 1129 Yang Y., Moore M.J., Brockington S.F., Timoneda A., Feng T., Marx H.E., Walker J.F., Smith  
1130 S.A. 2017. An Efficient Field and Laboratory Workflow for Plant Phylotranscriptomic  
1131 Projects. *Appl. Plant Sci.* 5:1600128.
- 1132 Yang Y., Smith S.A. 2014. Orthology Inference in Nonmodel Organisms Using Transcriptomes  
1133 and Low-Coverage Genomes: Improving Accuracy and Matrix Occupancy for  
1134 Phylogenomics. *Mol. Biol. Evol.* 31:3081–3092.
- 1135 Yao G., Jin J.-J., Li H.-T., Yang J.-B., Mandala V.S., Croley M., Mostow R., Douglas N.A.,  
1136 Chase M.W., Christenhusz M.J.M., Soltis D.E., Soltis P.S., Smith S.A., Brockington S.F.,  
1137 Moore M.J., Yi T.-S., Li D.-Z. 2019. Plastid phylogenomic insights into the evolution of  
1138 Caryophyllales. *Mol. Phylogenet. Evol.* 134:74–86.
- 1139 Yu Y., Degnan J.H., Nakhleh L. 2012. The Probability of a Gene Tree Topology within a  
1140 Phylogenetic Network with Applications to Hybridization Detection. *PLoS Genet.*  
1141 8:e1002660–10.
- 1142 Yu Y., Dong J., Liu K.J., Nakhleh L. 2014. Maximum likelihood inference of reticulate  
1143 evolutionary histories. *Proc. Natl. Acad. Sci.* 111:16448–16453.
- 1144 Yu Y., Nakhleh L. 2015. A maximum pseudo-likelihood approach for phylogenetic networks.  
1145 *BMC Genomics.* 16:S10.
- 1146 Zhang C., Rabiee M., Sayyari E., Mirarab S. 2018. ASTRAL-III: polynomial time species tree  
1147 reconstruction from partially resolved gene trees. *BMC Bioinformatics.* 19:523.

- 1148 Zhao T., Schranz M.E. 2019. Network-based microsynteny analysis identifies major differences  
1149 and genomic outliers in mammalian and angiosperm genomes. *Proc. Natl. Acad. Sci.*  
1150 116:2165–2174.
- 1151 Zheng Y., Janke A. 2018. Gene flow analysis method, the D-statistic, is robust in a wide  
1152 parameter space. *BMC Bioinformatics.* 19:10.
- 1153 Zhu J., Liu X., Ogilvie H.A., Nakhleh L.K. 2019. A divide-and-conquer method for scalable  
1154 phylogenetic network inference from multilocus data. *Bioinformatics.* 35:i370–i378.
